# Supplementary material for: Asymmetric copper-catalyzed alkynylallylic dimethylamination
Source: Royal Society of Chemistry journal article supplement (doi:10.1039/d3qo01749d), 2023-12-05

Supporting Information for

# Asymmetric Copper-Catalyzed Alkynylallylic Dimethylamination

Si-Yuan Luo,<sup>a,b,c</sup> Guo-Qiang Lin<sup>a,b</sup> and Zhi-Tao He<sup>c,d\*</sup>

<sup>a</sup>State Key Laboratory of Chemical Biology, Shanghai Institute of Organic Chemistry, University of Chinese Academy of Sciences, Shanghai, 200032, China.

<sup>b</sup>School of Physical Science and Technology, ShanghaiTech University, Shanghai, 201210, China.

<sup>a</sup>State Key Laboratory of Organometallic Chemistry, Shanghai Institute of Organic Chemistry, University of Chinese Academy of Sciences, Shanghai, 200032, China.

<sup>d</sup>School of Chemistry and Materials Science, Hangzhou Institute for Advanced Study, University of Chinese Academy of Sciences, Hangzhou 310024, China.

## Table of Contents

|                                                                                           |     |
|-------------------------------------------------------------------------------------------|-----|
| 1. General information.....                                                               | S2  |
| 2. Synthesis of substrates.....                                                           | S2  |
| 3. Development of reaction conditions.....                                                | S6  |
| 4. General procedure for Cu-catalyzed alkynylallylic dimethylamination.....               | S12 |
| 5. Determination of absolute configuration.....                                           | S22 |
| 6. Mechanistic studies.....                                                               | S22 |
| 7. Computational studies.....                                                             | S24 |
| 8. References.....                                                                        | S40 |
| 9. Copies of <sup>1</sup> H NMR, <sup>13</sup> C NMR and <sup>19</sup> F NMR spectra..... | S41 |

## 1. General information

All air-sensitive procedures were conducted by Schlenk techniques under argon. Unless otherwise indicated, all commercially available starting materials and dry solvents were purchased and used directly without further purification.  $^1\text{H}$ ,  $^{13}\text{C}$  and  $^{19}\text{F}$  NMR spectra were acquired on 400 MHz Bruker or 500 MHz Agilent instruments at Shanghai Institute of Organic Chemistry. For High-resolution mass spectra: ESI mass spectra were recorded on Thermo Scientific Q Exactive HF Orbitrap-FTMS; MALDI was measured on Voyager-DE STR; EI mass spectra were recorded on Waters Premier GC-TOF MS; FI mass spectra were recorded on JEOL-AccuTOF-GCv4G-GCT MS. Optical rotation was measured using a 1 mL cell with 1.0 dm path length on a JASCO P-1030 polarimeter. HPLC analysis was conducted on a Shimadzu HPLC system equipped with Daicel or Chiralpak chiral-stationary-phase columns ( $\phi$  4.6 mm $\times$ 250 mm). Chemical shifts are reported in  $\delta$  (ppm) referenced to an internal TMS standard or  $\text{CHCl}_3$  in  $\text{CDCl}_3$  (7.26 ppm) for  $^1\text{H}$  NMR,  $\text{CDCl}_3$  ( $\delta$  = 77.10 ppm) for  $^{13}\text{C}$  NMR, and  $\text{CFC}_3$  (0 ppm) for  $^{19}\text{F}$  NMR. Coupling constants ( $J$ ) are reported in Hz. Multiplicities are reported using the following abbreviations: br = broad, s = singlet, d = doublet, t = triplet, q = quartet, m = multiplet. Column chromatography was performed with 300-400 mesh silica gel using flash column chromatography technique.

## 2. Synthesis of substrates

### 2.1 Synthesis of enyne esters

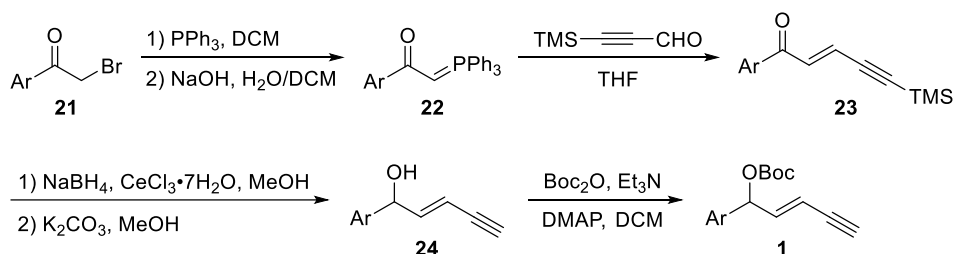

General procedure: To a solution of **21** (10 mmol) in DCM (20 mL) were added the solution of PPh<sub>3</sub> (10 mmol) in DCM (20 mL) dropwise at 0 °C. The reaction mixture was then allowed to stir at room temperature for 24 hours followed by the addition of aqueous NaOH (1.2 M, 10 mL). The new mixture was allowed to stir at room temperature for another 2 hours. After this time, the resulting mixture was quenched with water (20 mL), extracted with DCM (20 mL  $\times$  3), washed by brine, dried over anhydrous Na<sub>2</sub>SO<sub>4</sub> and concentrated under reduced pressure to afford Wittig reagent **22** without further purification. Then, to a solution of **22** in THF (50 mL) was added 3-(trimethylsilyl) propionaldehyde (10 mmol) dropwise at 0 °C. The reaction mixture was allowed to stir at room temperature for 4 hours. After this time, the resulting mixture was concentrated and purified by flash column chromatography on silica gel to give **23**.

To a solution of **23** (1.0 equiv) and CeCl<sub>3</sub>·7H<sub>2</sub>O (1.2 equiv) in MeOH (0.5 M) was added NaBH<sub>4</sub> (1.3 equiv) slowly at 0 °C. The reaction mixture was then allowed to stir at room temperature for 4

hours. After this time, the resulting mixture was quenched with water (10 mL), extracted with EtOAc (20 mL  $\times$  3), washed by brine, dried over anhydrous Na<sub>2</sub>SO<sub>4</sub> and concentrated under reduced pressure to give crude alcohol. To a solution of the crude alcohol in MeOH (0.5 M) was added K<sub>2</sub>CO<sub>3</sub> (1.2 equiv). The reaction mixture was then allowed to stir at room temperature for 1 hours. After this time, the resulting mixture was quenched with water (20 mL), extracted with DCM (20 mL  $\times$  3), washed by brine, dried over anhydrous Na<sub>2</sub>SO<sub>4</sub> and concentrated under reduced pressure to afford crude products **24**. Next, to a solution of **24** (1.0 equiv) in DCM (0.5 M) was added DMAP (0.1 equiv), Et<sub>3</sub>N (2.0 equiv) and Boc<sub>2</sub>O (1.5 equiv) sequentially. The reaction mixture was allowed to stir at room temperature for 12 hours. After this time, the resulting mixture was quenched with saturated aqueous NH<sub>4</sub>Cl (10 mL), extracted with DCM (20 mL  $\times$  3), washed by brine, dried over anhydrous Na<sub>2</sub>SO<sub>4</sub> and concentrated. The residue was finally purified by flash column chromatography on silica gel to give pure **1**.

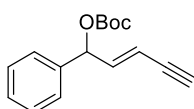

**(E)-tert-Butyl (1-phenylpent-2-en-4-yn-1-yl) carbonate (1a)**

Known compound<sup>1</sup>. White solid, 66% yield. <sup>1</sup>H NMR (400 MHz, chloroform-*d*)  $\delta$  7.41 – 7.28 (m, 5H), 6.36 (dd, *J* = 15.9, 6.1 Hz, 1H), 6.06 (dd, *J* = 6.1, 1.3 Hz, 1H), 5.73 (ddd, *J* = 15.9, 2.2, 1.6 Hz, 1H), 2.92 (d, *J* = 2.3 Hz, 1H), 1.47 (s, 9H).

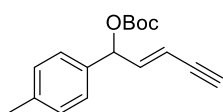

**(E)-tert-Butyl (1-(p-tolyl)pent-2-en-4-yn-1-yl) carbonate (1b)**

Yellow solid, 70% yield. <sup>1</sup>H NMR (400 MHz, chloroform-*d*)  $\delta$  7.24 (d, *J* = 8.0 Hz, 2H), 7.17 (d, *J* = 8.0 Hz, 2H), 6.35 (dd, *J* = 15.9, 6.1 Hz, 1H), 6.03 (d, *J* = 6.1 Hz, 1H), 5.75 – 5.67 (m, 1H), 2.91 (d, *J* = 2.1 Hz, 1H), 2.34 (s, 3H), 1.46 (s, 9H). <sup>13</sup>C NMR (126 MHz, CDCl<sub>3</sub>)  $\delta$  152.6, 142.4, 138.5, 134.7, 129.5, 127.2, 111.0, 82.7, 81.2, 79.1, 77.9, 27.8, 21.3. HRMS (FI): [M]<sup>+</sup> calcd for C<sub>17</sub>H<sub>20</sub>O<sub>3</sub><sup>+</sup> 272.1407, found 272.1405.

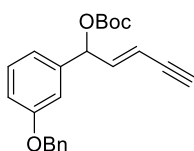

**(E)-1-(3-(Benzyloxy)phenyl)pent-2-en-4-yn-1-yl tert-butyl carbonate (1c)**

Known compound<sup>1</sup>. Yellow solid, 80% yield. <sup>1</sup>H NMR (400 MHz, chloroform-*d*)  $\delta$  7.49 – 7.22 (m, 6H), 7.02 – 6.86 (m, 3H), 6.33 (dd, *J* = 15.9, 6.1 Hz, 1H), 6.02 (dd, *J* = 6.2, 1.5 Hz, 1H), 5.77 – 5.66 (m, 1H), 5.06 (s, 2H), 2.93 (d, *J* = 2.3 Hz, 1H), 1.47 (s, 9H).

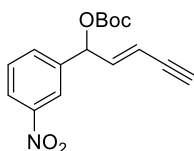

**(E)-tert-Butyl (1-(3-nitrophenyl)pent-2-en-4-yn-1-yl) carbonate (1d)**

Known compound<sup>1</sup>. Brown oil, 34% yield. <sup>1</sup>H NMR (400 MHz, chloroform-*d*) δ 8.23 (s, 1H), 8.22 – 8.17 (m, 1H), 7.69 (d, *J* = 7.7 Hz, 1H), 7.57 (t, *J* = 7.9 Hz, 1H), 6.31 (dd, *J* = 15.9, 6.4 Hz, 1H), 6.13 (d, *J* = 6.3 Hz, 1H), 5.85 – 5.77 (m, 1H), 2.98 (d, *J* = 2.0 Hz, 1H), 1.48 (s, 9H).

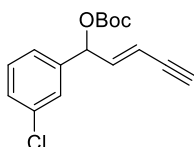

**(E)-tert-Butyl (1-(3-chlorophenyl)pent-2-en-4-yn-1-yl) carbonate (1e)**

Known compound<sup>1</sup>. Yellow oil, 57% yield. <sup>1</sup>H NMR (400 MHz, chloroform-*d*) δ 7.35 (s, 1H), 7.30 (d, *J* = 5.1 Hz, 2H), 7.23 (dd, *J* = 6.1, 2.7 Hz, 1H), 6.30 (dd, *J* = 15.9, 6.2 Hz, 1H), 6.01 (d, *J* = 6.2 Hz, 1H), 5.75 (dt, *J* = 15.8, 1.6 Hz, 1H), 2.95 (d, *J* = 2.0 Hz, 1H), 1.48 (s, 9H).

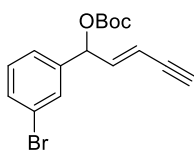

**(E)-1-(3-Bromophenyl)pent-2-en-4-yn-1-yl tert-butyl carbonate (1f)**

Known compound<sup>1</sup>. Yellow oil, 42% yield. <sup>1</sup>H NMR (400 MHz, chloroform-*d*) δ 7.50 (s, 1H), 7.46 (d, *J* = 7.6 Hz, 1H), 7.30 – 7.20 (m, 2H), 6.30 (dd, *J* = 15.9, 6.2 Hz, 1H), 6.01 (d, *J* = 6.3 Hz, 1H), 5.72 (d, *J* = 15.9 Hz, 1H), 2.95 (d, *J* = 2.0 Hz, 1H), 1.48 (s, 9H).

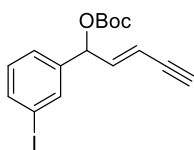

**(E)-tert-Butyl (1-(3-iodophenyl)pent-2-en-4-yn-1-yl) carbonate (1g)**

Known compound<sup>1</sup>. Yellow solid, 80% yield. <sup>1</sup>H NMR (400 MHz, chloroform-*d*) δ 7.70 – 7.65 (m, 2H), 7.31 (dt, *J* = 7.7, 1.4 Hz, 1H), 7.10 (t, *J* = 7.8 Hz, 1H), 6.29 (ddd, *J* = 15.8, 6.2, 0.6 Hz, 1H), 5.97 (dd, *J* = 6.3, 1.5 Hz, 1H), 5.74 (ddd, *J* = 15.9, 2.3, 1.5 Hz, 1H), 2.95 (d, *J* = 2.3 Hz, 1H), 1.47 (s, 9H).

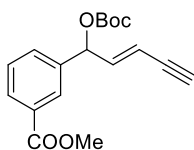

**Methyl (E)-3-(1-((tert-butoxycarbonyl)oxy)pent-2-en-4-yn-1-yl)benzoate (1h)**

Known compound<sup>1</sup>. White solid, 33% yield. <sup>1</sup>H NMR (400 MHz, chloroform-*d*) δ 8.01 (m, 2H), 7.55 (d, *J* = 7.6 Hz, 1H), 7.45 (t, *J* = 7.7 Hz, 1H), 6.34 (dd, *J* = 15.9, 6.2 Hz, 1H), 6.09 (d, *J* = 6.2 Hz, 1H), 5.75 (d, *J* = 15.9 Hz, 1H), 3.92 (s, 3H), 2.94 (s, 1H), 1.47 (s, 9H).

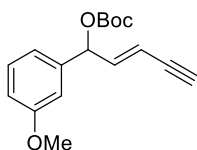

**(*E*)-tert-Butyl (1-(3-methoxyphenyl)pent-2-en-4-yn-1-yl) carbonate (1i)**

Known compound<sup>1</sup>. Yellow oil, 60% yield. <sup>1</sup>H NMR (400 MHz, chloroform-*d*) δ 7.29 (d, *J* = 7.9 Hz, 1H), 6.93 (d, *J* = 7.6 Hz, 1H), 6.90 – 6.82 (m, 2H), 6.34 (ddd, *J* = 15.9, 6.2, 0.7 Hz, 1H), 6.03 (d, *J* = 6.1 Hz, 1H), 5.77 – 5.68 (m, 1H), 3.81 (s, 3H), 2.92 (d, *J* = 2.3 Hz, 1H), 1.47 (s, 9H).

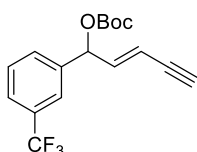

**(*E*)-tert-Butyl (1-(3-(trifluoromethyl)phenyl)pent-2-en-4-yn-1-yl) carbonate (1j)**

Known compound<sup>1</sup>. Yellow oil, 44% yield. <sup>1</sup>H NMR (400 MHz, chloroform-*d*) δ 7.72 – 7.42 (m, 4H), 6.32 (dd, *J* = 15.9, 6.3 Hz, 1H), 6.10 (d, *J* = 6.2 Hz, 1H), 5.77 (d, *J* = 15.9 Hz, 1H), 2.96 (d, *J* = 2.3 Hz, 1H), 1.48 (s, 9H).

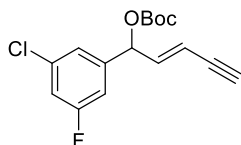

**(*E*)-tert-Butyl (1-(3-chloro-5-fluorophenyl)pent-2-en-4-yn-1-yl) carbonate (1k)**

Known compound<sup>1</sup>. Yellow solid. <sup>1</sup>H NMR (400 MHz, chloroform-*d*) δ 7.14 (s, 1H), 7.05 (dt, *J* = 8.3, 2.2 Hz, 1H), 6.97 (d, *J* = 8.9 Hz, 1H), 6.25 (dd, *J* = 15.9, 6.3 Hz, 1H), 6.03 – 5.94 (m, 1H), 5.77 (dd, *J* = 18.2, 1.4 Hz, 1H), 2.97 (d, *J* = 2.3 Hz, 1H), 1.48 (s, 9H).

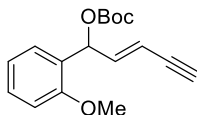

**(*E*)-tert-Butyl (1-(2-methoxyphenyl)pent-2-en-4-yn-1-yl) carbonate (1l)**

Known compound<sup>1</sup>. White solid, 93% yield. <sup>1</sup>H NMR (400 MHz, chloroform-*d*) δ 7.35 (dd, *J* = 7.6, 1.7 Hz, 1H), 7.30 – 7.26 (m, 1H), 6.96 (td, *J* = 7.5, 1.1 Hz, 1H), 6.88 (dd, *J* = 8.3, 1.1 Hz, 1H), 6.49 (dd, *J* = 6.1, 1.4 Hz, 1H), 6.35 (ddd, *J* = 15.8, 6.1, 0.7 Hz, 1H), 5.69 (ddd, *J* = 15.9, 2.3, 1.4 Hz, 1H), 3.84 (s, 3H), 2.89 (d, *J* = 2.2 Hz, 1H), 1.47 (s, 9H).

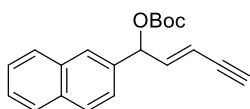

### (*E*)-*tert*-Butyl (1-(naphthalen-2-yl)pent-2-en-4-yn-1-yl) carbonate (**1m**)

Yellow solid, 85% yield.  $^1\text{H}$  NMR (500 MHz, chloroform-*d*)  $\delta$  7.84 (q,  $J = 6.9, 5.4$  Hz, 4H), 7.49 (dd,  $J = 6.3, 3.1$  Hz, 2H), 7.45 (dd,  $J = 8.5, 1.4$  Hz, 1H), 6.43 (dd,  $J = 15.9, 6.1$  Hz, 1H), 6.23 (d,  $J = 6.1$  Hz, 1H), 5.78 (dt,  $J = 15.9, 1.7$  Hz, 1H), 2.93 (d,  $J = 2.1$  Hz, 1H), 1.47 (s, 9H).  $^{13}\text{C}$  NMR (126 MHz,  $\text{CDCl}_3$ )  $\delta$  152.6, 142.1, 135.1, 133.4, 133.2, 128.7, 128.2, 127.8, 126.5, 126.5, 126.5, 124.7, 111.5, 82.9, 81.1, 79.3, 78.1, 27.8. HRMS (FI):  $[\text{M}]^+$  calcd for  $\text{C}_{20}\text{H}_{20}\text{O}_3^+$  308.1412, found 308.1411.

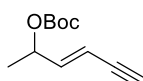

### (*E*)-*tert*-Butyl hex-3-en-5-yn-2-yl carbonate (**1n**)

Known compound<sup>1</sup>. Yellow oil, 67% yield.  $^1\text{H}$  NMR (400 MHz, chloroform-*d*)  $\delta$  6.19 (dd,  $J = 16.0, 6.3$  Hz, 1H), 5.70 (ddd,  $J = 16.1, 2.3, 1.4$  Hz, 1H), 5.16 (td,  $J = 6.5, 1.4$  Hz, 1H), 2.90 (d,  $J = 2.3$  Hz, 1H), 1.48 (s, 9H), 1.35 (d,  $J = 6.6$  Hz, 3H).

## 2.2 Synthesis of OAc-easter

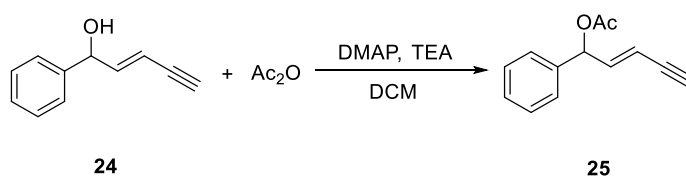

(*E*)-1-phenylpent-2-en-4-yn-1-ol (**25**). To a solution of **24** (10 mmol) in DCM (20 mL) were added DMAP (0.1 equiv),  $\text{Et}_3\text{N}$  (2.0 equiv) and  $\text{Ac}_2\text{O}$  (1.5 equiv) sequentially. The reaction mixture was then allowed to stir at room temperature for 12 hours. After this time, the resulting mixture was quenched with saturated aqueous  $\text{NH}_4\text{Cl}$  (10 mL), extracted with DCM (20 mL  $\times$  3), washed by brine, dried over anhydrous  $\text{Na}_2\text{SO}_4$  and concentrated under reduced pressure. The residue was finally purified by flash column chromatography on silica gel (hexane/ $\text{EtOAc} = 20/1$ ) to give **25** as a yellow oil in 96% yield.  $^1\text{H}$  NMR (400 MHz, chloroform-*d*)  $\delta$  7.35 (q,  $J = 6.5, 6.0$  Hz, 5H), 6.37 – 6.29 (m, 2H), 5.73 – 5.68 (m, 1H), 2.93 (d,  $J = 1.9$  Hz, 1H), 2.11 (s, 3H).  $^{13}\text{C}$  NMR (126 MHz,  $\text{CDCl}_3$ )  $\delta$  169.8, 142.3, 137.9, 128.8, 128.6, 127.3, 111.2, 81.1, 79.2, 75.0, 21.2. HRMS (FI):  $[\text{M}]^+$  calcd for  $\text{C}_{13}\text{H}_{12}\text{O}_2^+$  200.0827, found 200.0832.

## 2.3 Synthesis of methanediamine nucleophiles

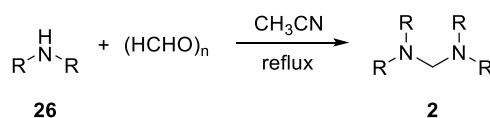

General procedure: to a solution of **26** (10 mmol) in CH<sub>3</sub>CN (50 mL) was added paraformaldehyde (5 mmol). The reaction mixture was then allowed to stir under reflux for 4 hours. After this time, the resulting mixture was cooled to room temperature, dried over anhydrous Na<sub>2</sub>SO<sub>4</sub> and concentrated under reduced pressure to afford **2**.

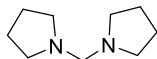

### Di(pyrrolidin-1-yl)methane (**2c**)

Known compound<sup>2</sup>. Yellow oil, 77% yield. <sup>1</sup>H NMR (400 MHz, chloroform-*d*) δ 3.22 (s, 2H), 2.58 (d, *J* = 6.3 Hz, 9H), 1.78 (d, *J* = 6.3 Hz, 8H).

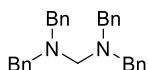

### *N,N,N',N'*-Tetrabenzylmethanediamine (**2e**)

Known compound<sup>2</sup>. White solid, 90% yield. <sup>1</sup>H NMR (400 MHz, chloroform-*d*) δ 7.31 – 7.20 (m, 20H), 3.61 (s, 8H), 3.09 (s, 2H).

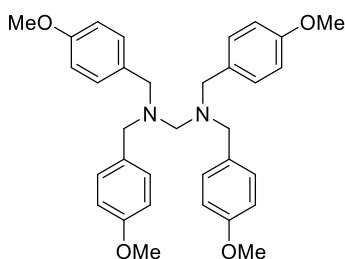

### *N,N,N',N'*-Tetrakis(4-methoxybenzyl)methanediamine (**2f**)

Known compound<sup>3</sup>. White solid, 90% yield. <sup>1</sup>H NMR (400 MHz, chloroform-*d*) δ 7.19 (d, *J* = 8.5 Hz, 8H), 6.80 (d, *J* = 8.5 Hz, 8H), 3.70 (s, 12H), 3.52 (s, 8H), 3.05 (s, 2H).

## 3. Development of reaction conditions

### 3.1 Evaluation of chiral ligands

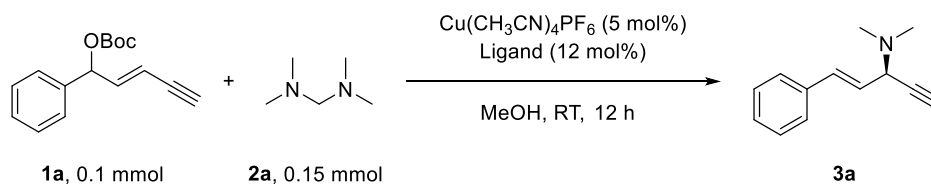

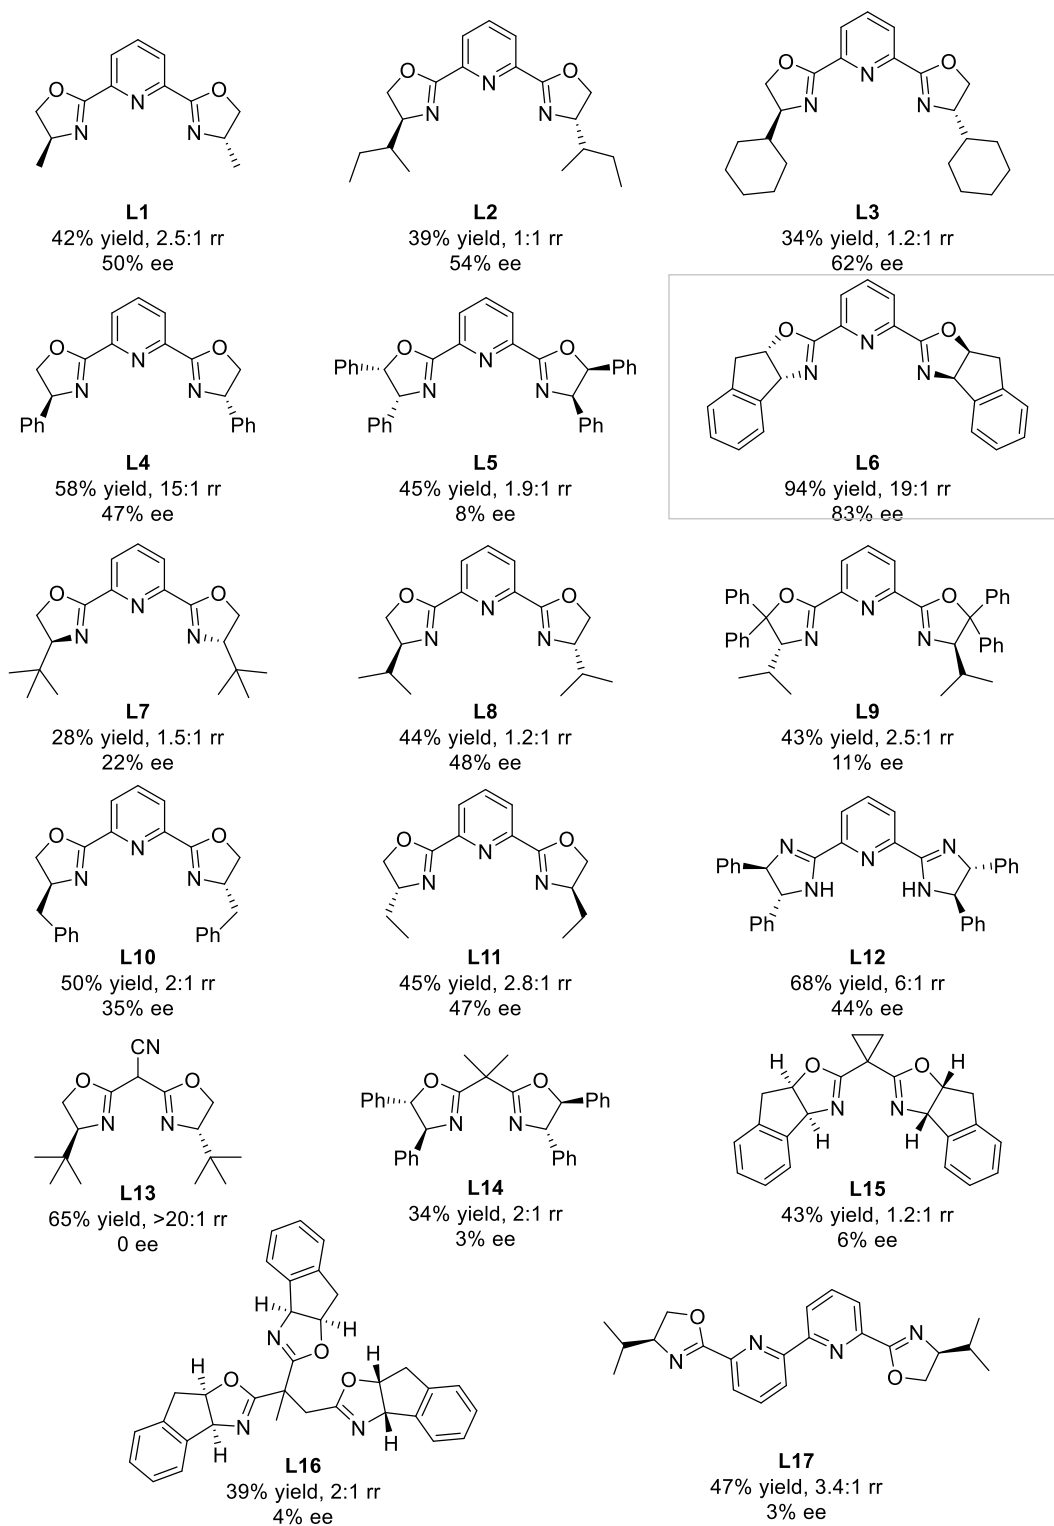

The yields and rr values were determined by crude  $^1\text{H}$  NMR. The ee values were determined by HPLC analysis.



### 3.2 Evaluation of solvents

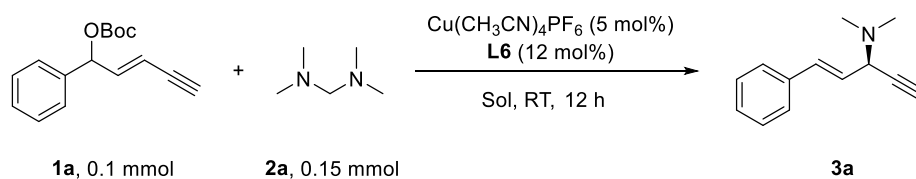

| Entry | Solvent        | Yield | rr    | ee  |
|-------|----------------|-------|-------|-----|
| 1     | MeOH           | 94%   | 19:1  | 83% |
| 2     | EtOH           | 66%   | 13:1  | 72% |
| 3     | DCM            | 21%   | >20:1 | 12% |
| 4     | MeCN           | 9%    | 1:2.6 | 70% |
| 5     | DCE            | 39%   | 3.5:1 | 10% |
| 6     | dioxane        | 41%   | 2.7:1 | 60% |
| 7     | MeOH:Tol = 2:5 | 77%   | >20:1 | 80% |

The yields and rr values were determined by crude  $^1\text{H}$  NMR. The ee values were determined by HPLC analysis.

### 3.3 Evaluation of the ratios of catalysts

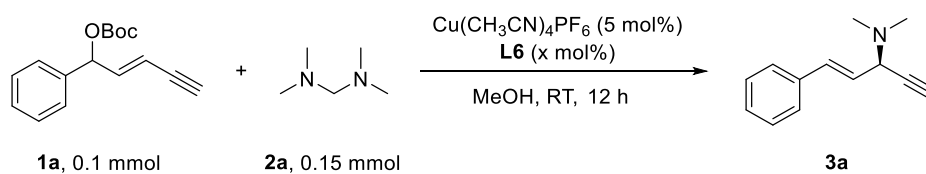

| Entry | x  | Yield | rr    | ee  |
|-------|----|-------|-------|-----|
| 1     | 3  | 94%   | 19:1  | 72% |
| 2     | 6  | 95%   | >20:1 | 82% |
| 3     | 9  | 89%   | >20:1 | 85% |
| 4     | 10 | 90%   | >20:1 | 86% |
| 5     | 12 | 94%   | 19:1  | 83% |

The yields and rr values were determined by crude  $^1\text{H}$  NMR. The ee values were determined by HPLC analysis.

### 3.4 Evaluation of the temperatures

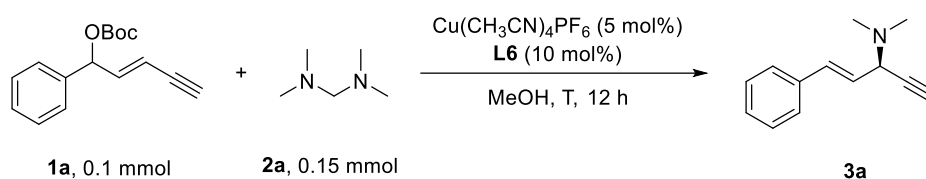

| Entry | T     | Yield | rr    | ee  |
|-------|-------|-------|-------|-----|
| 1     | -20°C | 72%   | 10:1  | 81% |
| 2     | -10°C | 79%   | >20:1 | 80% |
| 3     | 0°C   | 77%   | >20:1 | 83% |
| 4     | RT    | 90%   | >20:1 | 86% |
| 5     | 40°C  | 81%   | >20:1 | 80% |
| 6     | 60°C  | 55%   | 11:1  | 75% |

The yields and rr values were determined by crude  $^1\text{H}$  NMR. The ee values were determined by HPLC analysis.

### 3.5 Evaluation of the copper sources

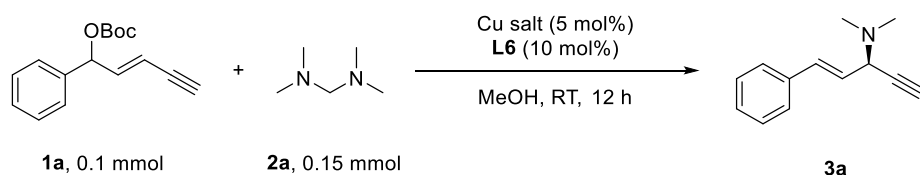

| Entry | Cu salt                                            | Yield | rr    | ee  |
|-------|----------------------------------------------------|-------|-------|-----|
| 1     | $\text{Cu}(\text{CH}_3\text{CN})_4\text{PF}_6$     | 90%   | >20:1 | 86% |
| 2     | $\text{Cu}(\text{CH}_3\text{CN})_4\text{BF}_4$     | 66%   | >20:1 | 82% |
| 3     | $\text{Cu}(\text{CH}_3\text{CN})_4\text{OTf}$      | 76%   | 19:1  | 83% |
| 4     | $(\text{CuOTf})_2\text{Tol}$                       | 96%   | >20:1 | 75% |
| 5     | $\text{Cu}(\text{TC})$                             | 76%   | >20:1 | 81% |
| 6     | $\text{Cu}(\text{OAc})_2 \cdot \text{H}_2\text{O}$ | 77%   | >20:1 | 81% |

The yields and rr values were determined by crude  $^1\text{H}$  NMR. The ee values were determined by HPLC analysis.

### 3.6 Evaluation of the ratios of reactants

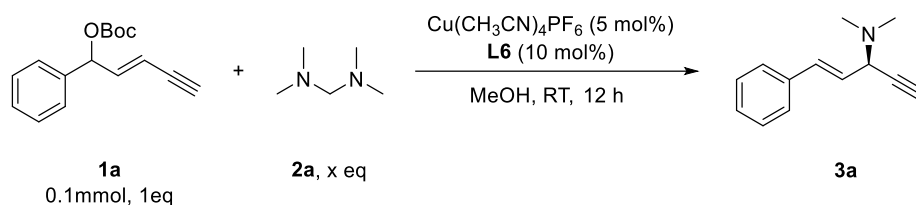

| Entry | x   | Yield | rr    | ee  |
|-------|-----|-------|-------|-----|
| 1     | 1   | 65%   | >20:1 | 84% |
| 2     | 1.5 | 90%   | >20:1 | 86% |
| 3     | 2   | 70%   | >20:1 | 78% |
| 4     | 2.5 | 72%   | >20:1 | 78% |
| 5     | 5   | 65%   | >20:1 | 68% |

The yields and rr values were determined by crude  $^1\text{H}$  NMR. The ee values were determined by HPLC analysis.

### 3.7 Evaluation of leaving groups

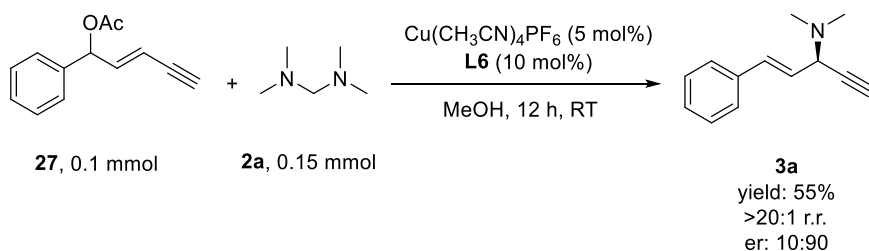

The yields and rr values were determined by crude  $^1\text{H}$  NMR. The ee values were determined by HPLC analysis.

### 3.8 Evaluation of additional chiral ligands

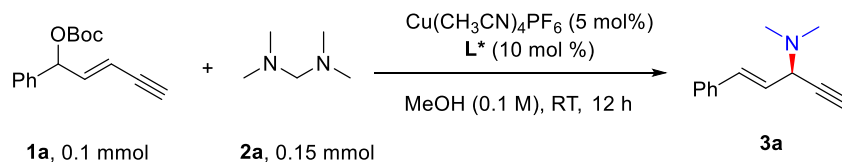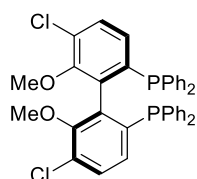

**L18**  
47% yield  
3.3:1 rr, 58% er

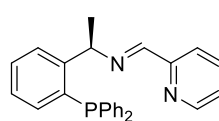

Hu's ligand  
**L19**  
43% yield  
2:1 rr, 2% er

#### 4. General procedure for Cu-catalyzed alkynylallylic dimethylation

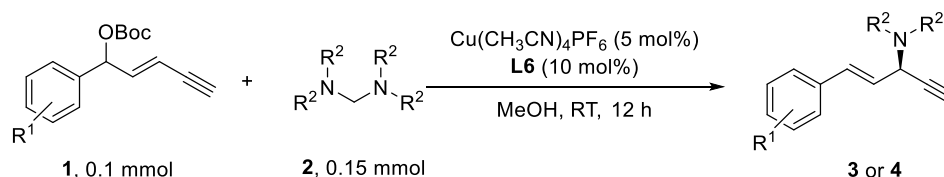

General procedure: In a  $\text{N}_2$ -filled glovebox,  $\text{Cu}(\text{CH}_3\text{CN})_4\text{PF}_6$  (1.9 mg, 0.005 mmol), **L6** (3.9 mg, 0.010 mmol) and anhydrous MeOH (0.5 mL) were added sequentially to a 4 mL vial. The reaction mixture was then allowed to stir at room temperature for 1 h, followed by the addition of enyne **1** (0.10 mmol) and nucleophiles **2** (0.15 mmol). The reaction was allowed to stir at room temperature for 12 h. After this time, the reaction was concentrated under reduced pressure and the residue was purified by flash column chromatography on silica gel to afford product **3** or **4**.

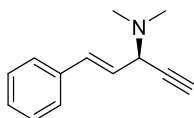

##### **(R,E)-N,N-Dimethyl-1-phenylpent-1-en-4-yn-3-amine (3a)**

Yellow oil, 90% yield, >20:1 rr.  $[\alpha]_{\text{D}}^{25} +3.2$  ( $c$  1.0,  $\text{CHCl}_3$ ) for 93:7 er.  $^1\text{H}$  NMR (400 MHz, chloroform- $d$ )  $\delta$  7.44 – 7.39 (m, 2H), 7.32 (t,  $J = 7.4$  Hz, 2H), 7.28 – 7.22 (m, 1H), 6.85 (dd,  $J = 15.9$ , 1.6 Hz, 1H), 6.22 (dd,  $J = 15.9$ , 5.0 Hz, 1H), 4.23 (dt,  $J = 4.4$ , 1.9 Hz, 1H), 2.52 (d,  $J = 2.2$  Hz, 1H), 2.31 (s, 6H).  $^{13}\text{C}$  NMR (126 MHz,  $\text{CDCl}_3$ )  $\delta$  136.6, 132.8, 128.7, 127.9, 127.2, 126.7, 78.2, 76.0, 59.3, 41.4. HRMS (ESI):  $[\text{M}+\text{H}]^+$  calcd for  $\text{C}_{13}\text{H}_{16}\text{N}^+$  186.5708, found 186.5709. HPLC analysis: chiral AD-H column; detected at 254 nm, 40 °C, flow = 0.7 mL/min,  $n$ -hexane:  $i$ -PrOH = 95:5; Retention time: 24.2 min (minor), 33.8 min (major).

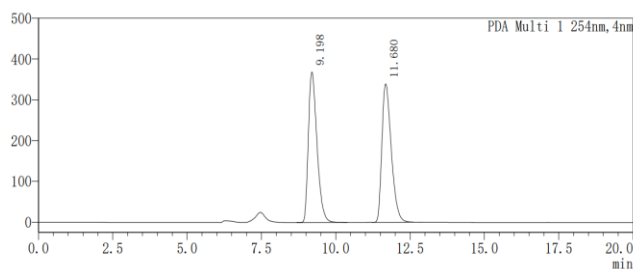

| Entry | Retention time/min | Area    | Area%  |
|-------|--------------------|---------|--------|
| 1     | 9.198              | 7475618 | 50.038 |
| 2     | 11.680             | 7464228 | 49.962 |

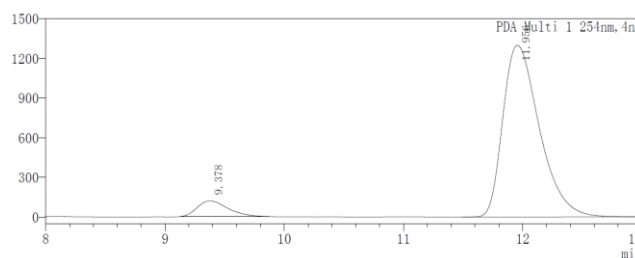

| Entry | Retention time/min | Area     | Area%  |
|-------|--------------------|----------|--------|
| 1     | 9.378              | 2116105  | 7.128  |
| 2     | 11.956             | 27569262 | 92.872 |

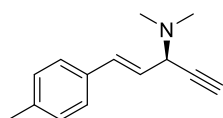

##### **(R,E)-N,N-Dimethyl-1-(p-tolyl)pent-1-en-4-yn-3-amine (3b)**

Yellow oil, 93% yield, >20:1 rr.  $[\alpha]_D^{25} +3.0$  ( $c$  0.40,  $\text{CHCl}_3$ ) for 90:10 er.  $^1\text{H}$  NMR (400 MHz, chloroform- $d$ )  $\delta$  7.31 (d,  $J = 8.0$  Hz, 2H), 7.13 (d,  $J = 7.9$  Hz, 2H), 6.86 – 6.76 (m, 1H), 6.16 (dd,  $J = 15.9, 5.1$  Hz, 1H), 4.24 – 4.17 (m, 1H), 2.51 (d,  $J = 2.2$  Hz, 1H), 2.34 (s, 3H), 2.31 (s, 6H).  $^{13}\text{C}$  NMR (126 MHz,  $\text{CDCl}_3$ )  $\delta$  137.7, 133.8, 132.7, 129.4, 126.6, 126.1, 78.4, 75.9, 59.3, 41.4, 21.3. HRMS (ESI):  $[\text{M}+\text{H}]^+$  calcd for  $\text{C}_{14}\text{H}_{18}\text{N}^+$  200.1351, found 200.1359. HPLC analysis: chiral AD-H column; detected at 254 nm, 40 °C, flow = 0.7 mL/min,  $n$ -hexane:  $i$ -PrOH = 95:5; Retention time: 22.0 min (minor), 29.8 min (major).

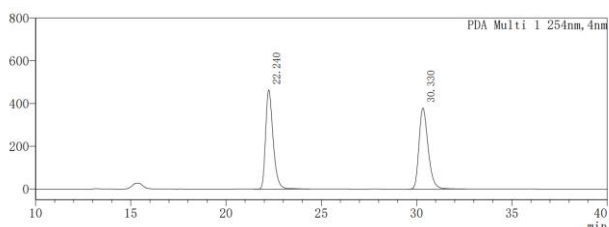

| Entry | Retention time/min | Area     | Area%  |
|-------|--------------------|----------|--------|
| 1     | 22.240             | 12680045 | 50.148 |
| 2     | 30.330             | 12605275 | 49.852 |

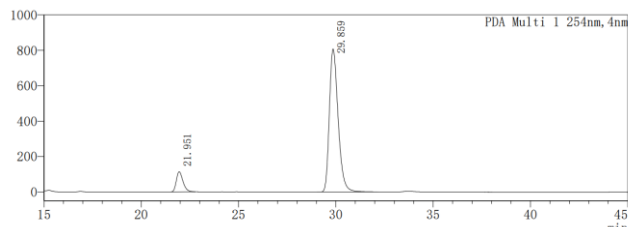

| Entry | Retention time/min | Area     | Area%  |
|-------|--------------------|----------|--------|
| 1     | 21.951             | 2696117  | 9.636  |
| 2     | 29.859             | 25284868 | 90.364 |

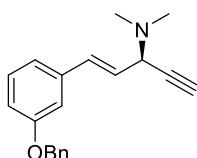

### (*R,E*)-1-(3-(Benzyloxy)phenyl)-*N,N*-dimethylpent-1-en-4-yn-3-amine (3c)

Colorless oil, 90% yield, >20:1 rr.  $[\alpha]_D^{25} +14$  ( $c$  0.90,  $\text{CHCl}_3$ ) for 91:9 er.  $^1\text{H}$  NMR (400 MHz, chloroform- $d$ )  $\delta$  7.38 (ddd,  $J = 25.1, 17.0, 7.0$  Hz, 5H), 7.23 (d,  $J = 7.9$  Hz, 1H), 7.06 – 6.99 (m, 2H), 6.91 – 6.77 (m, 2H), 6.21 (dd,  $J = 15.9, 4.9$  Hz, 1H), 5.07 (s, 2H), 4.25 – 4.19 (m, 1H), 2.52 (s, 1H), 2.31 (s, 6H).  $^{13}\text{C}$  NMR (126 MHz,  $\text{CDCl}_3$ )  $\delta$  159.1, 138.1, 137.0, 132.7, 129.7, 128.7, 128.0, 127.7, 127.6, 119.7, 114.5, 112.9, 78.2, 76.0, 70.0, 59.2, 41.4. HRMS (ESI):  $[\text{M}+\text{H}]^+$  calcd for  $\text{C}_{20}\text{H}_{21}\text{NO}^+$  292.1696, found 292.1690. HPLC analysis: chiral AD-H + AD-H column (the two columns were connected to each other in this order); detected at 254 nm, 40 °C, flow = 0.7 mL/min,  $n$ -hexane:  $i$ -PrOH = 95:5; Retention time: 26.0 min (minor), 42.6 min (major).

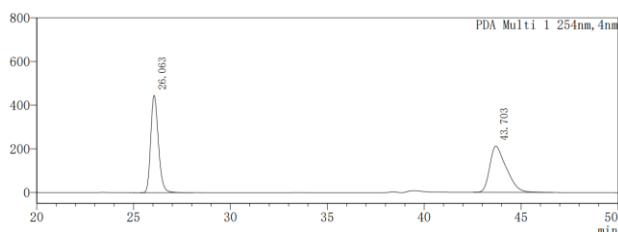

| Entry | Retention time/min | Area     | Area%  |
|-------|--------------------|----------|--------|
| 1     | 26.063             | 12256426 | 49.371 |
| 2     | 43.703             | 12568767 | 50.629 |

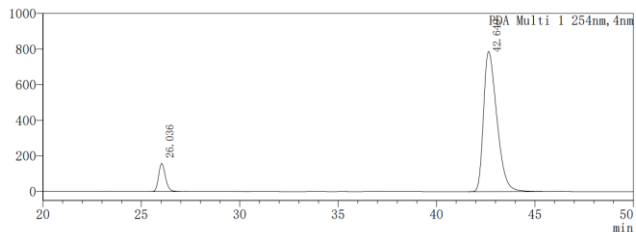

| Entry | Retention time/min | Area     | Area%  |
|-------|--------------------|----------|--------|
| 1     | 26.036             | 3868408  | 9.418  |
| 2     | 42.649             | 37206613 | 90.582 |

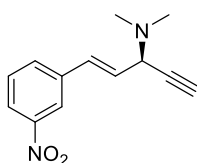

### (*R,E*)-*N,N*-Dimethyl-1-(3-nitrophenyl)pent-1-en-4-yn-3-amine (3d)

Yellow oil, 89% yield, >20:1 rr.  $[\alpha]_D^{25} +3.3$  ( $c$  1.2,  $\text{CHCl}_3$ ) for 93:7 er.  $^1\text{H}$  NMR (400 MHz, chloroform- $d$ )  $\delta$  8.26 (s, 1H), 8.10 (d,  $J = 8.2$  Hz, 1H), 7.72 (d,  $J = 7.7$  Hz, 1H), 7.50 (t,  $J = 8.0$  Hz, 1H), 6.92 (dd,  $J = 16.0, 1.6$  Hz, 1H), 6.37 (dd,  $J = 15.9, 4.8$  Hz, 1H), 4.32 – 4.22 (m, 1H), 2.56 (d,  $J = 2.2$  Hz, 1H), 2.32 (s, 6H).  $^{13}\text{C}$  NMR (126 MHz,  $\text{CDCl}_3$ )  $\delta$  148.7, 138.3, 132.4, 130.8, 130.6, 129.6, 122.4, 121.4, 77.6, 76.5, 59.1, 41.5. HRMS (ESI):  $[\text{M}+\text{H}]^+$  calcd for  $\text{C}_{13}\text{H}_{15}\text{N}_2\text{O}_2^+$  231.1128, found 231.1130. HPLC analysis: chiral AD-H + AD-H column (the two columns were connected to each other in this order); detected at 254 nm, 40 °C, flow = 0.7 mL/min,  $n$ -hexane:  $i$ -PrOH = 95:5; Retention time: 31.4 min (minor), 44.9 min (major).

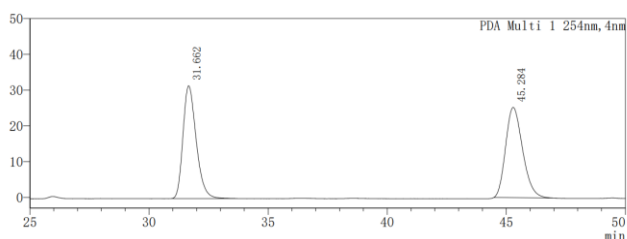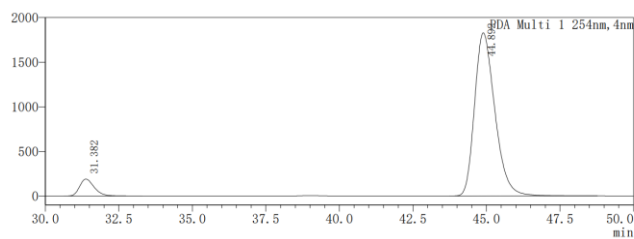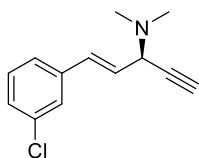

### (*R,E*)-1-(3-Chlorophenyl)-*N,N*-dimethylpent-1-en-4-yn-3-amine (3e)

Colorless oil, 76% yield, >20:1 rr.  $[\alpha]_D^{25} -0.22$  ( $c$  0.46,  $\text{CHCl}_3$ ) for 92:8 er.  $^1\text{H}$  NMR (400 MHz, chloroform- $d$ )  $\delta$  7.39 (s, 1H), 7.31 – 7.19 (m, 3H), 6.80 (d,  $J = 16.1$  Hz, 1H), 6.23 (dd,  $J = 15.9, 4.9$  Hz, 1H), 4.25 – 4.19 (m, 1H), 2.53 (d,  $J = 1.9$  Hz, 1H), 2.31 (s, 6H).  $^{13}\text{C}$  NMR (126 MHz,  $\text{CDCl}_3$ )  $\delta$  138.4, 134.6, 131.6, 129.9, 128.8, 127.8, 126.7, 124.8, 77.9, 76.2, 59.2, 41.4. HRMS (ESI):  $[\text{M}+\text{H}]^+$  calcd for  $\text{C}_{13}\text{H}_{15}\text{NCl}^+$  220.0888, found 220.0885. HPLC analysis: chiral AD-H column; detected at 254 nm, 40 °C, flow = 0.7 mL/min,  $n$ -hexane:  $i$ -PrOH = 95:5; Retention time: 18.8 min (minor), 22.9 min (major).

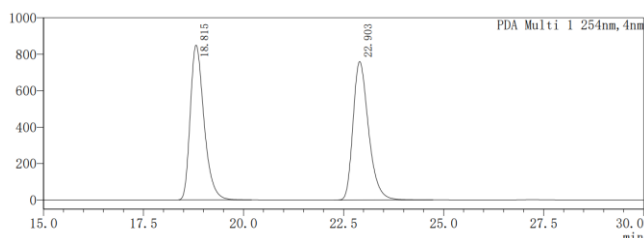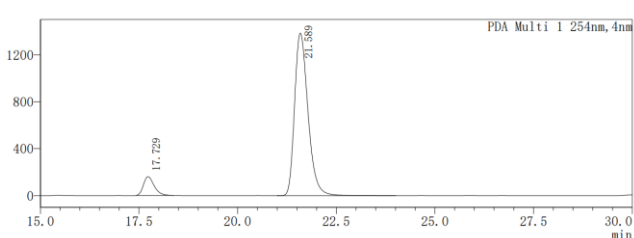

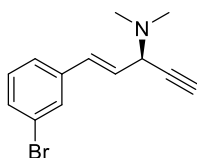

**(*R,E*)-1-(3-Bromophenyl)-*N,N*-dimethylpent-1-en-4-yn-3-amine (3f)**

Yellow oil, 93% yield, >20:1 rr.  $[\alpha]_D^{25}$  -41.0 (*c* 0.49, CHCl<sub>3</sub>) for 91:9 er. <sup>1</sup>H NMR (400 MHz, chloroform-*d*)  $\delta$  7.76 (s, 1H), 7.57 (d, *J* = 7.8 Hz, 1H), 7.36 (d, *J* = 7.6 Hz, 1H), 7.05 (t, *J* = 7.8 Hz, 1H), 6.75 (d, *J* = 15.9 Hz, 1H), 6.21 (dd, *J* = 15.9, 4.9 Hz, 1H), 4.26 – 4.16 (m, 1H), 2.52 (s, 1H), 2.30 (s, 6H). <sup>13</sup>C NMR (126 MHz, CDCl<sub>3</sub>)  $\delta$  138.7, 131.4, 130.7, 130.2, 129.7, 128.9, 125.2, 122.8, 77.9, 76.2, 59.1, 41.4. HRMS (ESI): [M+H]<sup>+</sup> calcd for C<sub>13</sub>H<sub>15</sub>NBr<sup>+</sup> 264.0382, found 264.0378. HPLC analysis: chiral AD-H column; detected at 254 nm, 40 °C, flow = 0.7 mL/min, *n*-hexane: *i*-PrOH = 95:5; Retention time: 19.1 min (minor), 23.1 min (major).

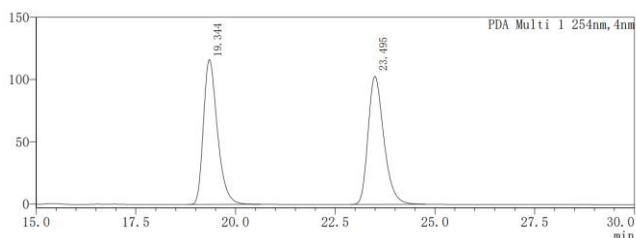

| Entry | Retention time/min | Area    | Area%  |
|-------|--------------------|---------|--------|
| 1     | 19.344             | 2833930 | 50.056 |
| 2     | 23.495             | 2827617 | 49.944 |

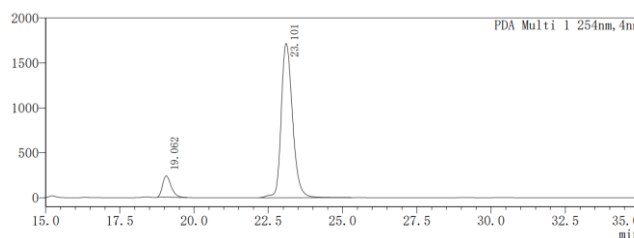

| Entry | Retention time/min | Area    | Area%  |
|-------|--------------------|---------|--------|
| 1     | 19.062             | 4778243 | 9.493  |
| 2     | 23.101             | 4555276 | 90.507 |

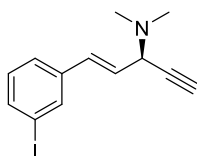

**(*R,E*)-1-(3-Iodophenyl)-*N,N*-dimethylpent-1-en-4-yn-3-amine (3g)**

Yellow oil, 67% yield, >20:1 rr.  $[\alpha]_D^{25}$  +5.7 (*c* 1.2, CHCl<sub>3</sub>) for 91:9 er. <sup>1</sup>H NMR (400 MHz, chloroform-*d*)  $\delta$  7.76 (s, 1H), 7.57 (d, *J* = 7.8 Hz, 1H), 7.36 (d, *J* = 7.6 Hz, 1H), 7.05 (t, *J* = 7.8 Hz, 1H), 6.75 (d, *J* = 15.9 Hz, 1H), 6.21 (dd, *J* = 15.9, 4.9 Hz, 1H), 4.25 – 4.18 (m, 1H), 2.52 (s, 1H), 2.30 (s, 6H). <sup>13</sup>C NMR (126 MHz, CDCl<sub>3</sub>)  $\delta$  138.8, 136.7, 135.7, 131.3, 130.3, 128.8, 125.8, 94.7, 78.0, 76.2, 59.1, 41.4. HRMS (ESI): [M+H]<sup>+</sup> calcd for C<sub>13</sub>H<sub>15</sub>NI<sup>+</sup> 312.0243, found 312.0241. HPLC analysis: chiral AD-H; detected at 254 nm, 40 °C, flow = 0.7 mL/min, *n*-hexane: *i*-PrOH = 95:5; Retention time: 23.6 min (major), 19.8 min (minor).

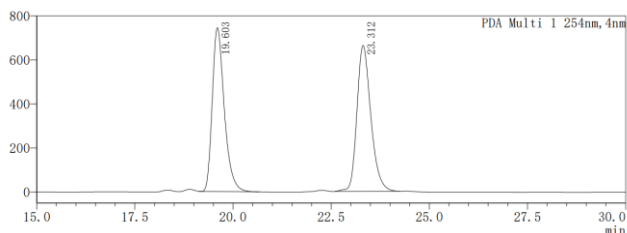

| Entry | Retention time/min | Area     | Area%  |
|-------|--------------------|----------|--------|
| 1     | 19.603             | 15860691 | 49.289 |
| 2     | 23.312             | 16318338 | 50.711 |

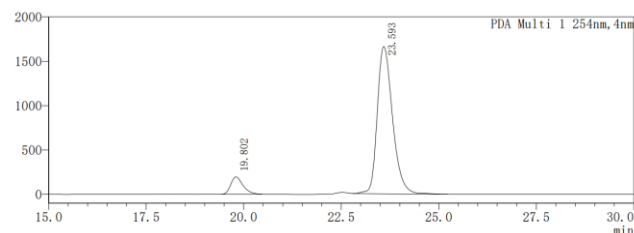

| Entry | Retention time/min | Area     | Area%  |
|-------|--------------------|----------|--------|
| 1     | 19.802             | 4281166  | 8.634  |
| 2     | 23.593             | 45302183 | 91.366 |

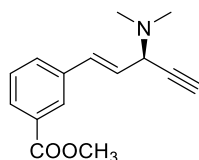

### Methyl (*R,E*)-3-(3-(dimethylamino)pent-1-en-4-yn-1-yl)benzoate (**3h**)

Colorless oil, 80% yield, >20:1 rr.  $[\alpha]_D^{25} +2.3$  (*c* 0.60, CHCl<sub>3</sub>) for 92:8 er. <sup>1</sup>H NMR (400 MHz, chloroform-*d*)  $\delta$  8.09 (s, 1H), 7.92 (d, *J* = 7.8 Hz, 1H), 7.60 (d, *J* = 7.7 Hz, 1H), 7.40 (t, *J* = 7.7 Hz, 1H), 6.90 (d, *J* = 16.0 Hz, 1H), 6.31 (dd, *J* = 15.9, 4.9 Hz, 1H), 4.25 (d, *J* = 4.9 Hz, 1H), 3.92 (s, 3H), 2.55 (d, *J* = 2.1 Hz, 1H), 2.32 (s, 6H). <sup>13</sup>C NMR (126 MHz, CDCl<sub>3</sub>)  $\delta$  167.0, 136.8, 131.9, 130.9, 130.6, 128.9, 128.8, 128.5, 127.9, 77.9, 76.3, 59.2, 52.2, 41.4. HRMS (ESI): [M+H]<sup>+</sup> calcd for C<sub>15</sub>H<sub>18</sub>NO<sub>2</sub><sup>+</sup> 244.1332, found 244.1333. HPLC analysis: chiral AD-H column; detected at 254 nm, 40 °C, flow = 0.7 mL/min, *n*-hexane: *i*-PrOH = 95:5; Retention time: 27.2 min (major), 21.5 min (minor).

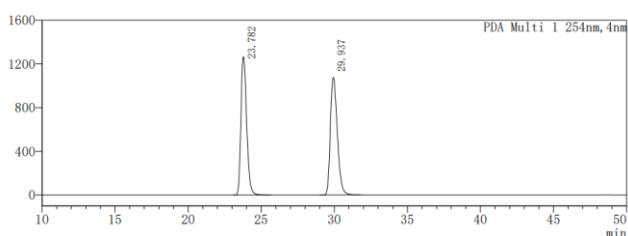

| Entry | Retention time/min | Area     | Area%  |
|-------|--------------------|----------|--------|
| 1     | 23.782             | 34584378 | 49.093 |
| 2     | 29.937             | 35861921 | 50.907 |

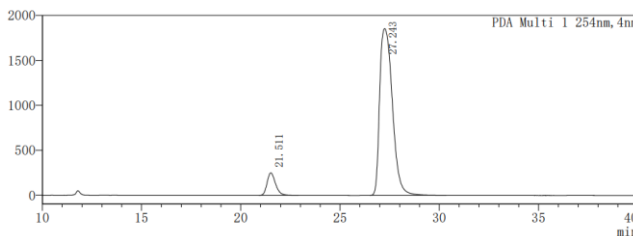

| Entry | Retention time/min | Area     | Area%  |
|-------|--------------------|----------|--------|
| 1     | 21.511             | 7396641  | 8.238  |
| 2     | 27.243             | 82389731 | 91.762 |

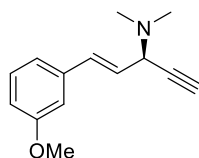

### (*R,E*)-1-(3-Methoxyphenyl)-*N,N*-dimethylpent-1-en-4-yn-3-amine (**3i**)

Yellow oil, 75% yield, >20:1 rr.  $[\alpha]_D^{25} +12.1$  (*c* 0.38, CHCl<sub>3</sub>) for 90:10 er. <sup>1</sup>H NMR (400 MHz, chloroform-*d*)  $\delta$  7.22 (t, *J* = 8.0 Hz, 1H), 7.00 (d, *J* = 7.6 Hz, 1H), 6.95 (s, 1H), 6.85 – 6.77 (m, 2H), 6.21 (dd, *J* = 15.9, 5.0 Hz, 1H), 4.27 – 4.18 (m, 1H), 3.81 (s, 3H), 2.52 (d, *J* = 2.0 Hz, 1H), 2.31 (s, 6H). <sup>13</sup>C NMR (126 MHz, CDCl<sub>3</sub>)  $\delta$  159.9, 138.0, 132.8, 129.6, 127.5, 119.4, 113.7, 111.8, 78.2, 76.1, 59.2, 55.3, 41.4. HRMS (ESI): [M+H]<sup>+</sup> calcd for C<sub>14</sub>H<sub>17</sub>NO<sup>+</sup> 216.1381, found 216.1384. HPLC analysis: chiral AD-H + AD-H column (the two columns were connected to each other in this order); detected at 254 nm, 40 °C, flow = 0.7 mL/min, *n*-hexane: *i*-PrOH = 95:5; Retention time: 21.3 min (minor), 25.7 min (major).

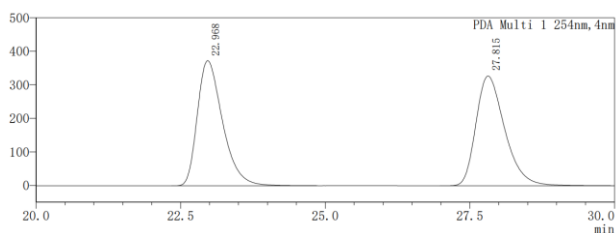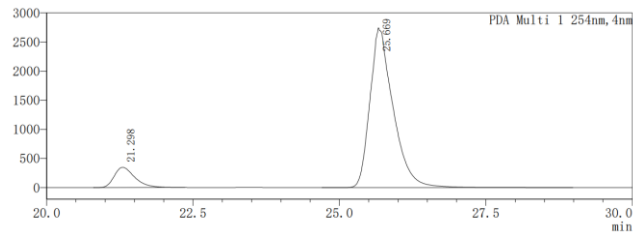



| Entry | Retention time/min | Area     | Area%  |
|-------|--------------------|----------|--------|
| 1     | 22.968             | 11325858 | 49.970 |
| 2     | 27.815             | 11339566 | 50.030 |

| Entry | Retention time/min | Area     | Area%  |
|-------|--------------------|----------|--------|
| 1     | 21.298             | 8480791  | 10.133 |
| 2     | 25.669             | 75211051 | 89.867 |

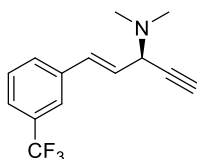

**(*R,E*)-*N,N*-Dimethyl-1-(3-(trifluoromethyl)phenyl)pent-1-en-4-yn-3-amine (3j)**

Yellow oil, 64% yield, >20:1 rr.  $[\alpha]_D^{25} +27.1$  ( $c$  0.14,  $\text{CHCl}_3$ ) for 92:8 er.  $^1\text{H}$  NMR (400 MHz, chloroform- $d$ )  $\delta$  7.65 (s, 1H), 7.58 (d,  $J = 7.6$  Hz, 1H), 7.50 (d,  $J = 7.5$  Hz, 1H), 7.44 (t,  $J = 7.7$  Hz, 1H), 6.89 (d,  $J = 15.9$  Hz, 1H), 6.30 (dd,  $J = 15.9, 4.8$  Hz, 1H), 4.29 – 4.20 (m, 1H), 2.54 (s, 1H), 2.32 (s, 6H).  $^{13}\text{C}$  NMR (126 MHz,  $\text{CDCl}_3$ )  $\delta$  137.4, 131.5, 131.1 (q,  $J_{\text{CF}} = 31.5$  Hz), 129.7, 129.4, 129.3, 124.4 (d,  $J_{\text{CF}} = 2.5$  Hz), 123.5 (d,  $J_{\text{CF}} = 2.5$  Hz), 77.8, 76.4, 59.1, 41.5 (the carbon signal of  $\text{CF}_3$  was not observed).  $^{19}\text{F}$  NMR (376 MHz,  $\text{CDCl}_3$ )  $\delta$  -49.47 (s, 3F). HRMS (ESI):  $[\text{M}+\text{H}]^+$  calcd for  $\text{C}_{14}\text{H}_{17}\text{NO}^+$  253.1078, found 253.1076. HPLC analysis: chiral AD-H column; detected at 254 nm, 40 °C, flow = 0.7 mL/min,  $n$ -hexane:  $i$ -PrOH = 95:5; Retention time: 8.2 min (minor), 9.3 min (major).

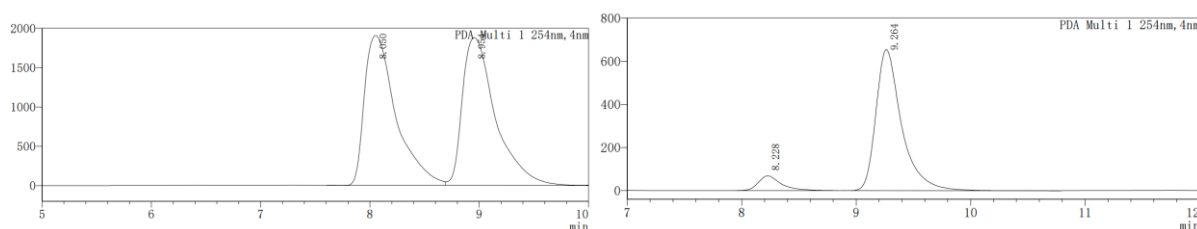

| Entry | Retention time/min | Area     | Area%  |
|-------|--------------------|----------|--------|
| 1     | 8.050              | 38299273 | 49.170 |
| 2     | 8.954              | 39592958 | 50.830 |

| Entry | Retention time/min | Area     | Area%  |
|-------|--------------------|----------|--------|
| 1     | 8.228              | 945953   | 8.475  |
| 2     | 9.264              | 10215590 | 91.525 |

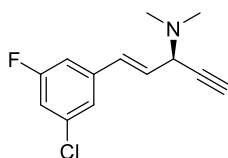

**(*R,E*)-1-(3-Chloro-5-fluorophenyl)-*N,N*-dimethylpent-1-en-4-yn-3-amine (3k)**

Yellow oil, 71% yield, >20:1 rr.  $[\alpha]_D^{25} +5.7$  ( $c$  1.75,  $\text{CHCl}_3$ ) for 89:11 er.  $^1\text{H}$  NMR (400 MHz, chloroform- $d$ )  $\delta$  7.18 (s, 1H), 6.99 (t,  $J = 9.3$  Hz, 2H), 6.76 (d,  $J = 15.9$  Hz, 1H), 6.24 (dd,  $J = 15.9, 4.7$  Hz, 1H), 4.26 – 4.18 (m, 1H), 2.53 (s, 1H), 2.30 (s, 6H).  $^{13}\text{C}$  NMR (101 MHz,  $\text{CDCl}_3$ )  $\delta$  163.0 (d,  $J = 249.5$  Hz), 139.9 (d,  $J_{\text{CF}} = 8.1$  Hz), 135.2 (d,  $J_{\text{CF}} = 11.1$  Hz), 130.6 (d,  $J_{\text{CF}} = 3.0$  Hz), 130.4, 122.9 (d,  $J_{\text{CF}} = 3.0$  Hz), 115.4 (d,  $J_{\text{CF}} = 25.2$  Hz), 111.7 (d,  $J_{\text{CF}} = 21.1$  Hz), 77.7, 76.4, 59.0, 41.5.  $^{19}\text{F}$  NMR (376 MHz,  $\text{CDCl}_3$ )  $\delta$  -98.01 (s, 1F). HRMS (ESI):  $[\text{M}+\text{H}]^+$  calcd for  $\text{C}_{14}\text{H}_{17}\text{NO}^+$  237.0721, found 237.0722. HPLC analysis: chiral AD-H + AD-H column (the two columns were connected to each other in this order); detected at 254 nm, 40 °C, flow = 0.7 mL/min,  $n$ -hexane:  $i$ -PrOH = 95:5; Retention time: 18.0 min (minor), 22.4 min (major).

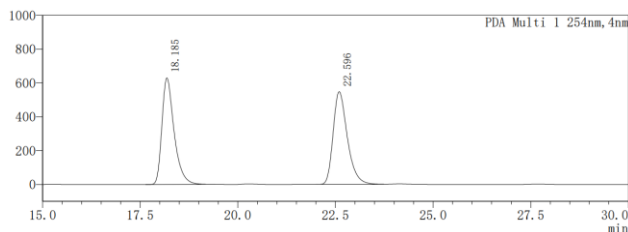

| Entry | Retention time/min | Area     | Area%  |
|-------|--------------------|----------|--------|
| 1     | 18.185             | 13685797 | 49.675 |
| 2     | 22.596             | 13865074 | 50.325 |

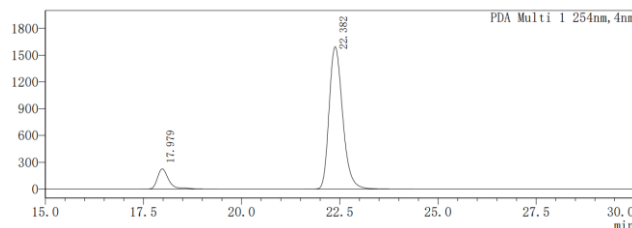

| Entry | Retention time/min | Area     | Area%  |
|-------|--------------------|----------|--------|
| 1     | 17.979             | 4553629  | 10.643 |
| 2     | 22.382             | 38232590 | 89.357 |

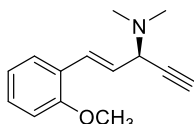

### (*R,E*)-1-(2-Methoxyphenyl)-*N,N*-dimethylpent-1-en-4-yn-3-amine (**3l**)

Yellow oil, 86% yield, >20:1 rr.  $[\alpha]_D^{25} +9.0$  ( $c$  0.50,  $\text{CHCl}_3$ ) for 90:10 er.  $^1\text{H}$  NMR (400 MHz, chloroform- $d$ )  $\delta$  7.44 (d,  $J = 7.6$  Hz, 1H), 7.23 (t,  $J = 7.8$  Hz, 1H), 7.14 (d,  $J = 14.9$  Hz, 1H), 6.96 – 6.84 (m, 2H), 6.26 (dd,  $J = 16.0, 5.2$  Hz, 1H), 4.26 – 4.18 (m, 1H), 3.85 (s, 3H), 2.51 (d,  $J = 2.1$  Hz, 1H), 2.32 (s, 6H).  $^{13}\text{C}$  NMR (101 MHz,  $\text{cdCl}_3$ )  $\delta$  157.0, 128.9, 127.9, 127.9, 127.4, 125.6, 120.7, 111.0, 78.6, 75.8, 59.7, 55.5, 41.5. HRMS (ESI):  $[\text{M}+\text{H}]^+$  calcd for  $\text{C}_{14}\text{H}_{17}\text{NO}^+$  216.1381, found 216.1383. HPLC analysis: chiral AD-H column; detected at 254 nm, 40 °C, flow = 0.7 mL/min, *n*-hexane: *i*-PrOH = 95:5; Retention time: 24.2 min (minor), 33.8 min (major).

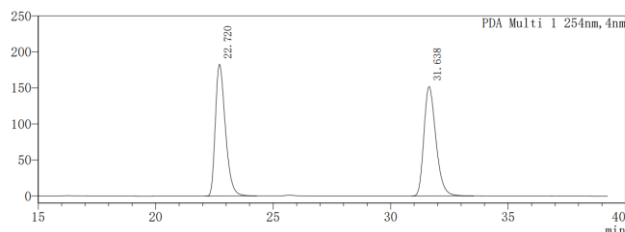

| Entry | Retention time/min | Area    | Area%  |
|-------|--------------------|---------|--------|
| 1     | 22.720             | 5429929 | 50.107 |
| 2     | 31.638             | 5406632 | 49.893 |

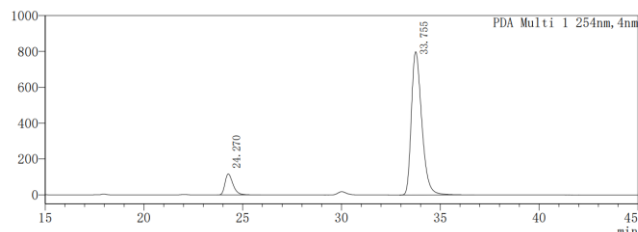

| Entry | Retention time/min | Area     | Area%  |
|-------|--------------------|----------|--------|
| 1     | 24.270             | 3290177  | 10.115 |
| 2     | 33.755             | 29238438 | 89.885 |

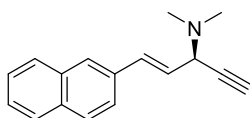

### (*R,E*)-*N,N*-Dimethyl-1-(naphthalen-2-yl)pent-1-en-4-yn-3-amine (**3m**)

Yellow solid, 90% yield, >20:1 rr.  $[\alpha]_D^{25} +21.1$  ( $c$  0.56,  $\text{CHCl}_3$ ) for 91:9 er.  $^1\text{H}$  NMR (400 MHz, chloroform- $d$ )  $\delta$  7.87 – 7.75 (m, 4H), 7.62 (dd,  $J = 8.5, 1.7$  Hz, 1H), 7.51 – 7.39 (m, 2H), 7.02 (dd,  $J = 15.9, 1.6$  Hz, 1H), 6.35 (dd,  $J = 15.9, 5.0$  Hz, 1H), 4.29 (dt,  $J = 4.4, 1.9$  Hz, 1H), 2.56 (d,  $J = 2.2$  Hz, 1H), 2.35 (s, 6H).  $^{13}\text{C}$  NMR (101 MHz,  $\text{cdCl}_3$ )  $\delta$  134.0, 133.6, 133.2, 132.9, 128.3, 128.1, 127.7, 127.6, 126.8, 126.4, 126.0, 123.7, 78.3, 76.1, 59.4, 41.5. HRMS (ESI):  $[\text{M}+\text{H}]^+$  calcd for  $\text{C}_{14}\text{H}_{17}\text{NO}^+$  216.1381, found 216.1383. HPLC analysis: chiral AD-H + AD-H column (the two columns were

connected to each other in this order); detected at 254 nm, 40 °C, flow = 0.7 mL/min, *n*-hexane: *i*-PrOH = 95:5; Retention time: 26.1 min (minor), 37.0 min (major).

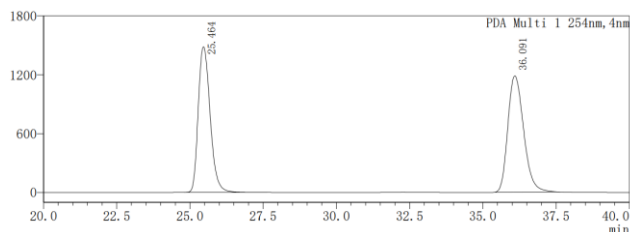

| Entry | Retention time/min | Area     | Area%  |
|-------|--------------------|----------|--------|
| 1     | 25.464             | 41964203 | 48.555 |
| 2     | 36.091             | 44461096 | 51.445 |

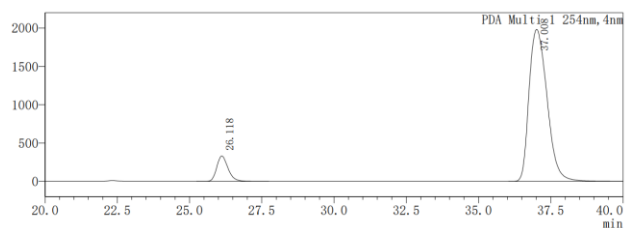

| Entry | Retention time/min | Area     | Area%  |
|-------|--------------------|----------|--------|
| 1     | 26.118             | 8995045  | 9.471  |
| 2     | 37.008             | 85978841 | 90.529 |

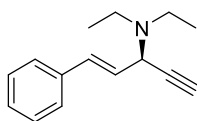

### (*R,E*)-*N,N*-Diethyl-1-phenylpent-1-en-4-yn-3-amine (4a)

Known compound<sup>1</sup>. Yellow oil, 66% yield, >20:1 rr.  $[\alpha]_D^{25} +4.8$  (*c* 0.15, CHCl<sub>3</sub>) for 89:11 er. <sup>1</sup>H NMR (400 MHz, chloroform-*d*)  $\delta$  7.41 (d, *J* = 7.4 Hz, 2H), 7.32 (t, *J* = 7.3 Hz, 2H), 7.23 (d, *J* = 7.3 Hz, 1H), 6.86 (d, *J* = 15.9 Hz, 1H), 6.24 (dd, *J* = 15.9, 4.5 Hz, 1H), 4.45 (s, 1H), 2.72 (dt, *J* = 13.3, 7.3 Hz, 2H), 2.54 – 2.41 (m, 3H), 1.10 (t, *J* = 7.1 Hz, 6H). HPLC analysis: chiral AD-H + AD-H column (the two columns were connected to each other in this order); detected at 254 nm, 40 °C, flow = 0.5 mL/min, *n*-hexane: *i*-PrOH = 99:1; Retention time: 21.7 min (major), 20.8 min (minor).

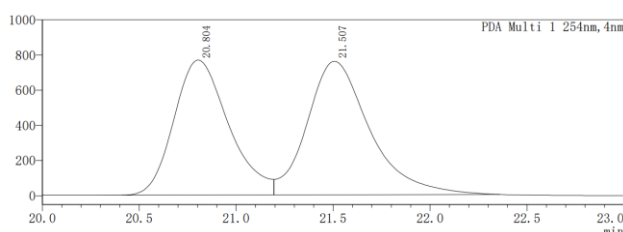

| Entry | Retention time/min | Area     | Area%  |
|-------|--------------------|----------|--------|
| 1     | 20.804             | 15092269 | 46.997 |
| 2     | 21.507             | 17020943 | 53.003 |

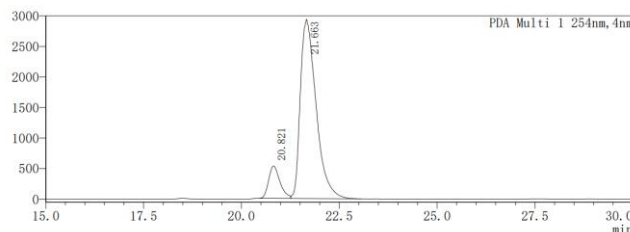

| Entry | Retention time/min | Area     | Area%  |
|-------|--------------------|----------|--------|
| 1     | 20.821             | 10664530 | 11.484 |
| 2     | 21.663             | 82201607 | 88.516 |

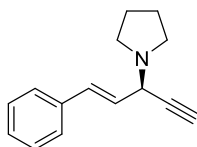

### (*R,E*)-1-(1-Phenylpent-1-en-4-yn-3-yl)pyrrolidine (4b)

Yellow oil, 91% yield, >20:1 rr.  $[\alpha]_D^{25} +12$  (*c* 0.45, CHCl<sub>3</sub>) for 87:13 er. <sup>1</sup>H NMR (400 MHz, chloroform-*d*)  $\delta$  7.40 (m, *J* = 7.3 Hz, 2H), 7.32 (m, *J* = 7.4 Hz, 2H), 7.23 (m, *J* = 7.1 Hz, 1H), 6.82 (d, *J* = 15.9 Hz, 1H), 6.29 (dd, *J* = 15.8, 5.7 Hz, 1H), 4.38 – 4.31 (m, 1H), 2.70 (dt, *J* = 13.5, 6.8 Hz, 4H), 2.47 (d, *J* = 2.0 Hz, 1H), 1.82 (s, 4H). <sup>13</sup>C NMR (126 MHz, CDCl<sub>3</sub>)  $\delta$  136.6, 132.1, 128.6, 127.8, 127.6, 126.7, 79.8, 75.0, 55.9, 49.8, 23.5. HRMS (ESI):  $[M+H]^+$  calcd for C<sub>15</sub>H<sub>18</sub>N<sup>+</sup> 212.0244, found 212.0240. HPLC analysis: chiral OJ-H + OJ-H column (the two columns were connected to each other

in this order); detected at 214 nm, 40 °C, flow = 0.7 mL/min, *n*-hexane: *i*-PrOH = 97:3; Retention time: 22.0 min (major), 26.0 min (minor).

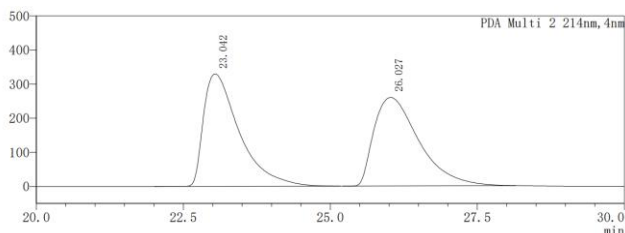

| Entry | Retention time/min | Area     | Area%  |
|-------|--------------------|----------|--------|
| 1     | 23.042             | 13965692 | 50.162 |
| 2     | 26.027             | 13875656 | 49.838 |

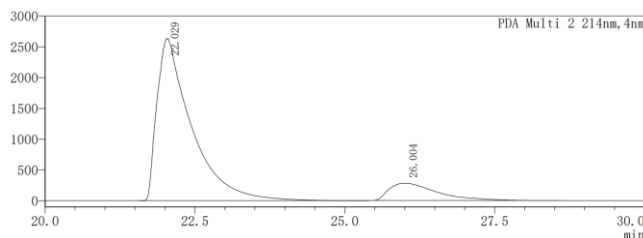

| Entry | Retention time/min | Area      | Area%  |
|-------|--------------------|-----------|--------|
| 1     | 22.029             | 105645225 | 87.053 |
| 2     | 26.004             | 15712811  | 12.947 |

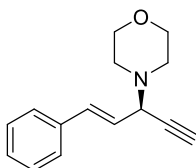

#### (*R,E*)-4-(1-Phenylpent-1-en-4-yn-3-yl)morpholine (4c)

Known compound<sup>1</sup>. Yellow oil, 84% yield, >20:1 rr.  $[\alpha]_D^{25} +12$  (*c* 0.64, CHCl<sub>3</sub>) for 94:6 er. <sup>1</sup>H NMR (400 MHz, chloroform-*d*)  $\delta$  7.41 (d, *J* = 7.3 Hz, 2H), 7.33 (t, *J* = 7.4 Hz, 2H), 7.25 (d, *J* = 14.3 Hz, 1H), 6.86 (d, *J* = 15.9 Hz, 1H), 6.21 (dd, *J* = 15.9, 5.2 Hz, 1H), 4.22 – 4.16 (m, 1H), 3.81 – 3.69 (m, 4H), 2.75 – 2.48 (m, 5H). HPLC analysis: chiral AD-H column; detected at 254 nm, 40 °C, flow = 0.5 mL/min, *n*-hexane: *i*-PrOH = 95:5; Retention time: 25.2 min (major), 23.0 min (minor).

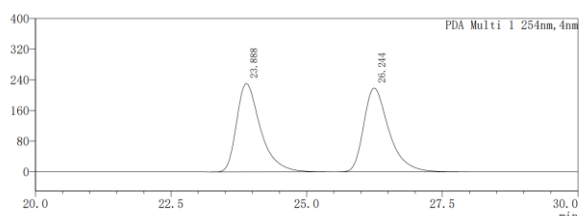

| Entry | Retention time/min | Area    | Area%  |
|-------|--------------------|---------|--------|
| 1     | 23.888             | 7072789 | 50.039 |
| 2     | 26.244             | 7061756 | 49.961 |

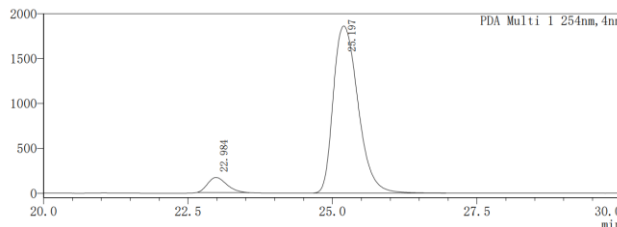

| Entry | Retention time/min | Area     | Area%  |
|-------|--------------------|----------|--------|
| 1     | 22.984             | 3838870  | 6.474  |
| 2     | 25.197             | 55457336 | 93.526 |

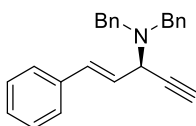

#### (*R,E*)-*N,N*-Dibenzyl-1-phenylpent-1-en-4-yn-3-amine (4d)

Known compound<sup>1</sup>. White solid, 91% yield, >20:1 rr.  $[\alpha]_D^{25} -9.7$  (*c* 0.60, CHCl<sub>3</sub>) for 95:5 er. <sup>1</sup>H NMR (400 MHz, chloroform-*d*)  $\delta$  7.45 – 7.18 (m, 15H), 6.90 (dd, *J* = 16.0, 1.8 Hz, 1H), 6.21 (dd, *J* = 15.9, 4.3 Hz, 1H), 4.35 – 4.25 (m, 1H), 3.86 (d, *J* = 13.7 Hz, 2H), 3.47 (d, *J* = 13.7 Hz, 2H), 2.58 (d, *J* = 2.2 Hz, 1H). HPLC analysis: chiral OJ-H column; detected at 254 nm, 40 °C, flow = 0.7 mL/min, *n*-hexane: *i*-PrOH = 97:3; Retention time: 11.0 min (major), 9.17 min (minor).

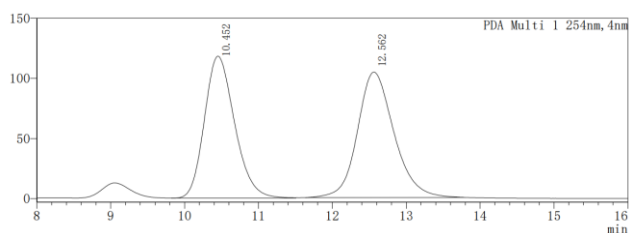

| Entry | Retention time/min | Area    | Area%  |
|-------|--------------------|---------|--------|
| 1     | 10.452             | 3355798 | 48.381 |
| 2     | 12.562             | 3580325 | 51.619 |

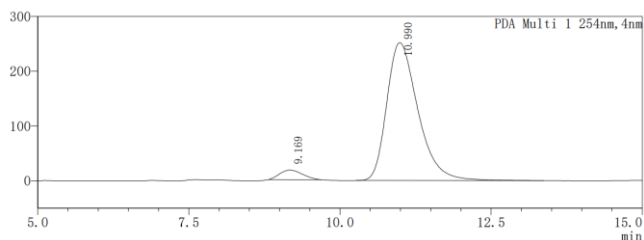

| Entry | Retention time/min | Area    | Area%  |
|-------|--------------------|---------|--------|
| 1     | 9.169              | 453557  | 4.775  |
| 2     | 10.990             | 9044140 | 95.225 |

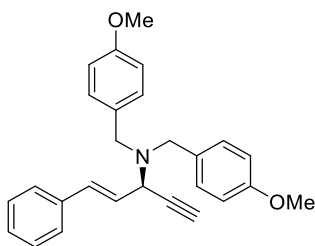

**(*R,E*)-*N,N*-Bis(4-methoxybenzyl)-1-phenylpent-1-en-4-yn-3-amine (4e)**

White solid, 50% yield, >20:1 rr.  $[\alpha]_D^{25}$  -36 (*c* 1.0, CHCl<sub>3</sub>) for 96:4 er. <sup>1</sup>H NMR (400 MHz, chloroform-*d*) δ 7.39 – 7.18 (m, 9H), 6.91 – 6.82 (m, 5H), 6.18 (dd, *J* = 16.0, 4.4 Hz, 1H), 4.30 (dt, *J* = 4.2, 2.1 Hz, 1H), 3.79 (s, 8H), 3.37 (d, *J* = 13.4 Hz, 2H), 2.57 (d, *J* = 2.2 Hz, 1H). <sup>13</sup>C NMR (126 MHz, CDCl<sub>3</sub>) δ 139.6, 136.7, 132.7, 128.9, 128.6, 128.4, 128.1, 127.7, 127.1, 126.6, 79.0, 75.7, 54.7, 53.7. (one carbon signal was not observed). HRMS (ESI): [M+H]<sup>+</sup> calcd for C<sub>27</sub>H<sub>28</sub>NO<sub>2</sub><sup>+</sup> 398.2114, found 398.2107. HPLC analysis: chiral OD-H + OD-H column (the two columns were connected to each other in this order); detected at 254 nm, 40 °C, flow = 0.7 mL/min, *n*-hexane: *i*-PrOH = 99:1; Retention time: 34.8 min (major), 33.2 min (minor).

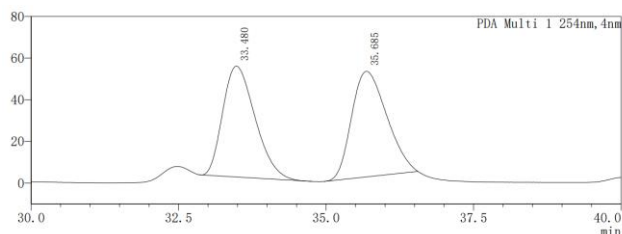

| Entry | Retention time/min | Area    | Area%  |
|-------|--------------------|---------|--------|
| 1     | 33.480             | 2035676 | 49.261 |
| 2     | 35.685             | 2096771 | 50.739 |

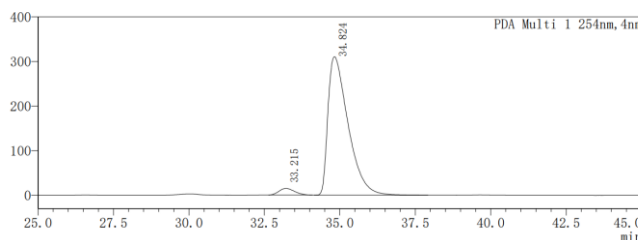

| Entry | Retention time/min | Area     | Area%  |
|-------|--------------------|----------|--------|
| 1     | 33.215             | 528586   | 3.540  |
| 2     | 34.824             | 14401417 | 96.460 |

## 5. Determination of absolute configuration

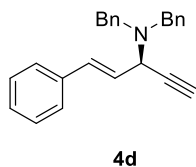

Compounds **4d** are known compounds<sup>1</sup>. By comparing the corresponding data of optical rotation and HPLC spectra under similar conditions, the absolute configuration of compound **4d** was determined to be (*R*)-**4d**.

## 6. Control experiments and Mechanistic studies

### 6.1 Control experiments

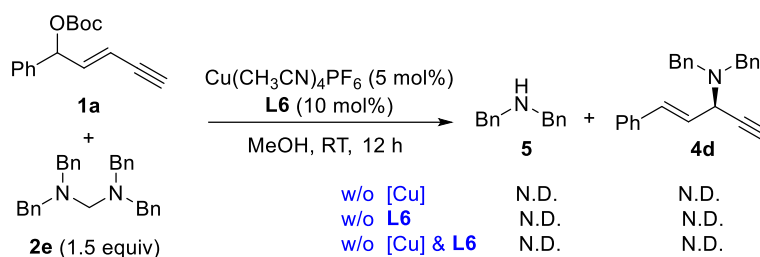

The procedure for these control experiments were same to that described in section 4 titled “General procedure for Cu-catalyzed alkynylallylic dimethylamination”, except that special requirements were followed for each case. For all these cases, no amine **5** and product **4d** were detected.

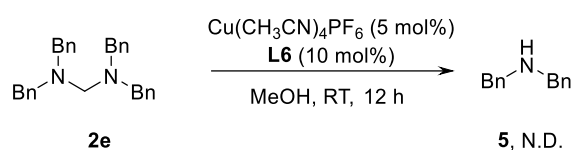

The procedure for this experiment was same to that described in section 4 titled “General procedure for Cu-catalyzed alkynylallylic dimethylamination”, except that electrophile **1a** was not used. After the reaction time, no amine **5** was detected.

### 6.2 Non-linear effect experiments



## 7. Computational details

### 7.1 Computational methods

All density functional theory (DFT) calculations were performed using the Gaussian 09 software package<sup>4</sup>. Geometries were optimized using the B3LYP functional and Grimme's D3(BJ) dispersion correction with the basis set of SDD for all atoms. Vibrational frequencies were calculated for all the stationary points to confirm if each optimized structure is a local minimum on the respective potential energy surface or a transition state structure with only one imaginary frequency. Solvation energy corrections were calculated in methanol solvent with the SMD continuum solvation model based on the gas phase optimized geometries. The BP86 functional with the basis set of def2-TZVP for all atoms was used for single-point energy calculations. The DFRT analysis based on the Hirshfeld charge calculation were obtained by Multiwfn 3.8 (dev)<sup>5, 6</sup>. The isosurface picture was rendered by VMD.

### 7.2 Cartesian coordinates of optimized structures

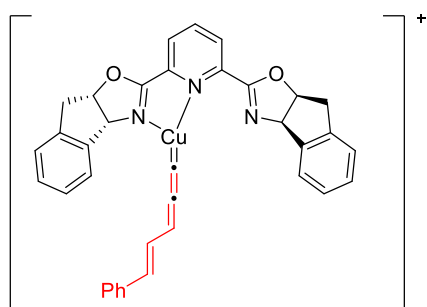

#### Int 1

|   |             |             |             |
|---|-------------|-------------|-------------|
| C | -0.46583854 | -0.21739130 | 0.00000000  |
| C | 0.03612446  | 1.03931470  | -0.34091900 |
| C | -2.15096754 | 1.55741370  | -1.19944900 |
| C | -2.56191354 | 0.27349270  | -0.81499400 |
| H | 1.06664246  | 1.29264770  | -0.12357700 |
| H | -2.86160254 | 2.22646570  | -1.66857600 |
| C | 0.34171646  | -1.24954130 | 0.67257900  |
| N | -0.14869854 | -2.38389230 | 1.03641300  |
| C | -3.95366054 | -0.18347930 | -1.00044800 |
| N | -4.38052854 | -1.32853630 | -0.64158300 |
| C | -6.08672254 | -0.02896830 | -1.72139000 |
| C | -5.82647854 | -1.31047530 | -0.87486100 |
| H | -6.21212254 | -0.20214730 | -2.79244200 |
| N | -1.72785354 | -0.59892130 | -0.23683500 |
| O | -4.82473254 | 0.70023570  | -1.55949900 |
| O | 1.62971846  | -1.01110230 | 0.91599700  |
| H | -6.13966854 | -2.23723630 | -1.36481000 |



|    |              |             |             |
|----|--------------|-------------|-------------|
| Cu | -1.96567054  | -2.88957530 | 0.46305700  |
| C  | -0.83283854  | 1.93799670  | -0.95996200 |
| H  | -0.48693154  | 2.92529770  | -1.24657900 |
| C  | 0.96575846   | -3.19371230 | 1.57769400  |
| H  | 0.68240846   | -3.58358830 | 2.55885800  |
| C  | 1.40504846   | -4.26447430 | 0.60629300  |
| C  | 0.66294546   | -5.35040230 | 0.14561200  |
| C  | 2.70490246   | -4.02705030 | 0.15048300  |
| C  | 1.24357946   | -6.20461330 | -0.79317700 |
| H  | -0.34758254  | -5.52448430 | 0.50298600  |
| C  | 3.28417046   | -4.88403530 | -0.78412600 |
| C  | 2.54427246   | -5.97120730 | -1.25402100 |
| H  | 0.68410746   | -7.05622430 | -1.16665000 |
| H  | 4.29479246   | -4.71220730 | -1.14242900 |
| H  | 2.98419246   | -6.64421930 | -1.98317400 |
| C  | 3.32104346   | -2.81776430 | 0.81894000  |
| H  | 3.73857846   | -2.09278630 | 0.11350900  |
| H  | 4.13180046   | -3.10572730 | 1.49791000  |
| C  | 2.16476246   | -2.19323030 | 1.61466400  |
| H  | 2.44648946   | -1.85074230 | 2.61079600  |
| C  | -6.58853654  | -1.05111330 | 0.40863500  |
| C  | -6.49136754  | -1.74210230 | 1.61575300  |
| C  | -7.41483754  | 0.06927570  | 0.28258700  |
| C  | -7.29816854  | -1.34313330 | 2.68493900  |
| H  | -5.77533754  | -2.55060430 | 1.72662300  |
| C  | -8.22103254  | 0.46542070  | 1.34949800  |
| C  | -8.16973854  | -0.25638830 | 2.54499300  |
| H  | -7.23822254  | -1.86797130 | 3.63331400  |
| H  | -8.87038654  | 1.33158670  | 1.26106200  |
| H  | -8.78964554  | 0.04687970  | 3.38299000  |
| C  | -7.26625654  | 0.71612070  | -1.07836900 |
| H  | -7.07040754  | 1.79117670  | -1.02262000 |
| H  | -8.16668054  | 0.58621770  | -1.69072600 |
| C  | -3.39671154  | -3.97046930 | 0.12633900  |
| C  | -4.42887154  | -4.59124630 | -0.22088400 |
| C  | -5.60355054  | -5.13042230 | -0.65002500 |
| H  | -5.58484154  | -5.82403230 | -1.49334800 |
| C  | -6.86074754  | -4.78433230 | -0.10881200 |
| H  | -6.87103554  | -4.09266730 | 0.72341800  |
| C  | -8.04026554  | -5.22165730 | -0.65723800 |
| H  | -7.98501454  | -5.94759830 | -1.46813000 |
| C  | -9.36061054  | -4.79066030 | -0.27816700 |
| C  | -10.47809754 | -5.43493030 | -0.85456700 |
| C  | -9.57911554  | -3.72680830 | 0.63050100  |

|   |              |             |             |
|---|--------------|-------------|-------------|
| C | -11.76936054 | -5.04754130 | -0.52054400 |
| H | -10.31750054 | -6.24626030 | -1.55865800 |
| C | -10.87064654 | -3.33907930 | 0.95152700  |
| H | -8.74249454  | -3.19117430 | 1.06424600  |
| C | -11.96769054 | -3.99921130 | 0.38282200  |
| H | -12.62044454 | -5.55453430 | -0.96250800 |
| H | -11.02679754 | -2.51648530 | 1.64153800  |
| H | -12.97631754 | -3.69142330 | 0.63984400  |

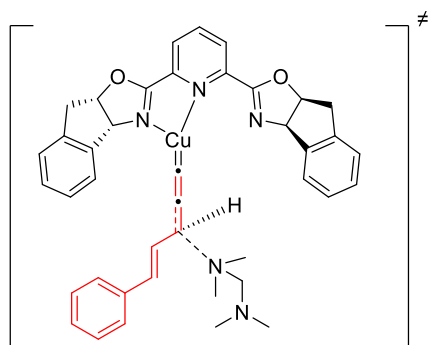

## TS 2

|    |             |             |             |
|----|-------------|-------------|-------------|
| C  | 0.48136649  | -0.72981365 | 0.00000000  |
| C  | -0.41487351 | -1.78604765 | -0.16811400 |
| C  | 1.35980549  | -2.96284865 | -1.28249700 |
| C  | 2.18052149  | -1.84170265 | -1.07821900 |
| H  | -1.42666051 | -1.71149765 | 0.21263400  |
| H  | 1.76078649  | -3.82982565 | -1.79249100 |
| C  | 0.12738149  | 0.50034435  | 0.72704300  |
| N  | 0.98792149  | 1.42001135  | 0.99016700  |
| C  | 3.57547649  | -1.82872865 | -1.56813100 |
| N  | 4.34540249  | -0.81530365 | -1.57888300 |
| C  | 5.39700349  | -2.78073265 | -2.50130500 |
| C  | 5.63041249  | -1.27756065 | -2.13133700 |
| H  | 5.41556049  | -2.99142465 | -3.57189900 |
| N  | 1.74564749  | -0.74621965 | -0.44725400 |
| O  | 4.02943549  | -3.01801865 | -2.05570800 |
| O  | -1.12911951 | 0.67090435  | 1.15430700  |
| H  | 5.88848549  | -0.64767265 | -2.98952500 |
| Cu | 2.72956949  | 1.46064735  | 0.07679200  |
| C  | 0.04589349  | -2.92676265 | -0.82573500 |
| H  | -0.61123051 | -3.77710165 | -0.97622100 |
| C  | 0.29511249  | 2.48423835  | 1.74754000  |
| H  | 0.76086049  | 2.56276235  | 2.73496700  |
| C  | 0.25321749  | 3.79489335  | 1.00666500  |
| C  | 1.31428649  | 4.66398035  | 0.76128600  |
| C  | -1.03248651 | 4.06309635  | 0.53126700  |

|   |             |             |             |
|---|-------------|-------------|-------------|
| C | 1.07445649  | 5.82303735  | 0.02211400  |
| H | 2.30792049  | 4.43646635  | 1.13500700  |
| C | -1.27287851 | 5.22351135  | -0.20468500 |
| C | -0.21239651 | 6.09728135  | -0.45742100 |
| H | 1.89087749  | 6.50673535  | -0.19001700 |
| H | -2.26896751 | 5.44972835  | -0.57476300 |
| H | -0.39115051 | 7.00380335  | -1.02844000 |
| C | -2.02009051 | 2.98786935  | 0.93565700  |
| H | -2.45479551 | 2.47019535  | 0.07302100  |
| H | -2.85525351 | 3.39512535  | 1.51610900  |
| C | -1.18837951 | 1.99665435  | 1.77998900  |
| H | -1.58956251 | 1.83950335  | 2.78044900  |
| C | 6.73077949  | -1.31193665 | -1.09501400 |
| C | 7.29969849  | -0.23127265 | -0.42435000 |
| C | 7.15170749  | -2.62055265 | -0.84506700 |
| C | 8.31520949  | -0.47333265 | 0.50212700  |
| H | 6.94623849  | 0.77545535  | -0.61455600 |
| C | 8.16349149  | -2.86235165 | 0.08447100  |
| C | 8.74310849  | -1.78225165 | 0.75428900  |
| H | 8.78030249  | 0.35689135  | 1.02619400  |
| H | 8.50139749  | -3.87578365 | 0.28399500  |
| H | 9.53489449  | -1.96059565 | 1.47627400  |
| C | 6.40995049  | -3.62482165 | -1.70163500 |
| H | 5.88641449  | -4.38473365 | -1.11097900 |
| H | 7.08919249  | -4.15873465 | -2.37699800 |
| C | 4.25318349  | 2.29205735  | -0.51627300 |
| C | 5.28705349  | 2.87190135  | -0.87256700 |
| C | 7.53412649  | 3.48579635  | -0.17341700 |
| H | 7.22269349  | 3.31143035  | 0.85183700  |
| C | 8.84369949  | 3.49826035  | -0.51898000 |
| H | 9.08700349  | 3.64882935  | -1.57109100 |
| C | 9.98792649  | 3.28455535  | 0.35533800  |
| C | 11.27952149 | 3.33805735  | -0.20025100 |
| C | 9.85745649  | 3.00881135  | 1.73179000  |
| C | 12.40657349 | 3.12769635  | 0.58938400  |
| H | 11.39251149 | 3.54413135  | -1.26145400 |
| C | 10.98294649 | 2.79611235  | 2.51795000  |
| H | 8.87314649  | 2.95448135  | 2.18602600  |
| C | 12.26102249 | 2.85561335  | 1.95044900  |
| H | 13.39554149 | 3.17273235  | 0.14416500  |
| H | 10.86840549 | 2.58190335  | 3.57610600  |
| H | 13.13746649 | 2.68770435  | 2.56877500  |
| N | 5.84736749  | 5.50161235  | -1.21358600 |
| C | 4.85782449  | 5.47290535  | -2.32575800 |

|   |            |            |             |
|---|------------|------------|-------------|
| H | 5.44406049 | 5.39883335 | -3.25819300 |
| H | 4.30124149 | 4.54234135 | -2.18944500 |
| C | 7.04428249 | 6.32000635 | -1.43769500 |
| H | 7.82600049 | 5.99696335 | -0.74546600 |
| H | 7.39441149 | 6.18165235 | -2.46352600 |
| H | 6.84377949 | 7.38189535 | -1.26707500 |
| C | 5.22575449 | 5.75582635 | 0.09223100  |
| H | 4.48513049 | 4.97480935 | 0.27990200  |
| H | 5.99962349 | 5.71886235 | 0.86247800  |
| H | 4.73454849 | 6.73149535 | 0.09662800  |
| N | 3.90455549 | 6.55909835 | -2.33908900 |
| C | 4.41678049 | 7.79269135 | -2.93233300 |
| H | 4.74966549 | 7.65518935 | -3.97713800 |
| H | 3.62817149 | 8.54978335 | -2.92189800 |
| H | 5.25467849 | 8.18502535 | -2.35254800 |
| C | 2.65928149 | 6.14214035 | -2.99097200 |
| H | 1.92723249 | 6.95079835 | -2.91329100 |
| H | 2.79475749 | 5.90582735 | -4.06115100 |
| H | 2.24871549 | 5.26581735 | -2.48367900 |
| C | 6.46573949 | 3.56474635 | -1.15794200 |
| H | 6.79558949 | 3.60774835 | -2.19742300 |

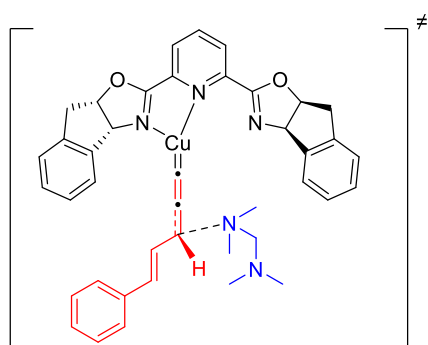

### TS 1

|   |             |             |             |
|---|-------------|-------------|-------------|
| C | 0.83850937  | 0.35714285  | 0.00000000  |
| C | -0.08723763 | 1.40294385  | 0.05097300  |
| C | 1.64993637  | 2.74377585  | 1.02480800  |
| C | 2.49886237  | 1.62937285  | 0.93950400  |
| H | -1.09540263 | 1.25825085  | -0.31850000 |
| H | 2.02708337  | 3.67296485  | 1.43387800  |
| C | 0.49237837  | -0.95405715 | -0.57237300 |
| N | 1.33853737  | -1.90994915 | -0.73950600 |
| C | 3.90086037  | 1.71436985  | 1.39628900  |
| N | 4.68683237  | 0.72415685  | 1.57139300  |
| C | 5.71630137  | 2.82094085  | 2.15994300  |
| C | 5.99992837  | 1.32097785  | 1.86426200  |

|    |             |             |             |
|----|-------------|-------------|-------------|
| H  | 5.66633337  | 3.08146485  | 3.22014200  |
| N  | 2.10046637  | 0.45676685  | 0.43565100  |
| O  | 4.36740637  | 2.97552785  | 1.62120100  |
| O  | -0.77295063 | -1.16699415 | -0.94659900 |
| H  | 6.46996237  | 0.79540985  | 2.70099900  |
| Cu | 3.18064637  | -1.91009815 | -0.12257400 |
| C  | 0.33765037  | 2.62148185  | 0.57774200  |
| H  | -0.34382863 | 3.46400685  | 0.63438600  |
| C  | 0.59195137  | -3.07994515 | -1.25705000 |
| H  | 1.09328637  | -3.45259415 | -2.15433800 |
| C  | 0.39152937  | -4.13795115 | -0.19630300 |
| C  | 1.37019537  | -4.88900115 | 0.45287600  |
| C  | -0.96217863 | -4.27978215 | 0.12160100  |
| C  | 0.97190337  | -5.79190315 | 1.44019700  |
| H  | 2.42036737  | -4.76698515 | 0.20234600  |
| C  | -1.35745063 | -5.18456315 | 1.10613600  |
| C  | -0.38213863 | -5.93710015 | 1.76408400  |
| H  | 1.71681737  | -6.38841115 | 1.95837400  |
| H  | -2.40712563 | -5.30581415 | 1.35874900  |
| H  | -0.67836363 | -6.64459715 | 2.53284000  |
| C  | -1.83622963 | -3.39239415 | -0.73760300 |
| H  | -2.52588863 | -2.76721715 | -0.16071400 |
| H  | -2.44593263 | -3.98208315 | -1.43290400 |
| C  | -0.84019063 | -2.51856115 | -1.51767400 |
| H  | -1.09641663 | -2.38848315 | -2.56966500 |
| C  | 6.87055637  | 1.36626185  | 0.62334600  |
| C  | 7.18052237  | 0.31714885  | -0.24033900 |
| C  | 7.29536737  | 2.67132585  | 0.35638500  |
| C  | 7.98906537  | 0.57828685  | -1.34959700 |
| H  | 6.75014437  | -0.66565615 | -0.08056700 |
| C  | 8.10393337  | 2.92995285  | -0.75017300 |
| C  | 8.46038137  | 1.87388885  | -1.59305600 |
| H  | 8.22961937  | -0.22265315 | -2.04402500 |
| H  | 8.44028037  | 3.94026185  | -0.96647700 |
| H  | 9.08373737  | 2.06679585  | -2.46128400 |
| C  | 6.73974537  | 3.64962885  | 1.36973300  |
| H  | 6.26955537  | 4.52559785  | 0.91104200  |
| H  | 7.51876237  | 4.02223085  | 2.04743600  |
| C  | 4.85435337  | -2.56818615 | 0.26538400  |
| C  | 5.93473337  | -3.08940415 | 0.56818800  |
| C  | 8.36570137  | -3.24510015 | 0.27207700  |
| H  | 8.35151937  | -2.26182915 | -0.18444700 |
| C  | 9.45679537  | -4.04040315 | 0.16140500  |
| H  | 9.40646537  | -5.04324915 | 0.58617400  |

|   |             |             |             |
|---|-------------|-------------|-------------|
| C | 10.70558937 | -3.70525415 | -0.50787700 |
| C | 10.98421537 | -2.41038215 | -0.99251900 |
| C | 11.67821437 | -4.70942915 | -0.66897700 |
| C | 12.19156837 | -2.14154415 | -1.62441600 |
| H | 10.26125737 | -1.61024315 | -0.86548100 |
| C | 12.88639637 | -4.43790015 | -1.30475600 |
| H | 11.47493437 | -5.71003115 | -0.29614700 |
| C | 13.14542337 | -3.15322815 | -1.78504400 |
| H | 12.39606037 | -1.14031515 | -1.99126100 |
| H | 13.62424937 | -5.22500115 | -1.42463300 |
| H | 14.08756137 | -2.93705315 | -2.27943600 |
| C | 6.07811137  | -2.78004915 | 3.45993200  |
| H | 5.47466637  | -2.33415415 | 2.66726800  |
| H | 5.70323937  | -3.80092015 | 3.63718000  |
| C | 8.30110837  | -3.93050415 | 3.52391300  |
| H | 7.72576137  | -4.83707615 | 3.72558800  |
| H | 9.13125537  | -4.16622015 | 2.85128400  |
| H | 8.71968737  | -3.55167115 | 4.46232900  |
| C | 8.13441337  | -1.64157515 | 2.73731200  |
| H | 9.11090237  | -1.81124915 | 2.28132600  |
| H | 7.54532237  | -0.99306015 | 2.09035500  |
| H | 8.24997237  | -1.16795715 | 3.71511600  |
| C | 4.78608037  | -1.12586715 | 4.65142900  |
| H | 4.65652537  | -0.60367415 | 3.69957800  |
| H | 3.88188437  | -1.73260715 | 4.83894800  |
| H | 4.86441237  | -0.38374815 | 5.45249100  |
| N | 6.01083037  | -1.92908615 | 4.62349500  |
| C | 6.21475737  | -2.62880315 | 5.88878200  |
| H | 7.17790637  | -3.14387115 | 5.89901300  |
| H | 6.21916037  | -1.90307715 | 6.70715900  |
| H | 5.42296137  | -3.37253915 | 6.09257400  |
| C | 7.15607737  | -3.64490115 | 0.96570900  |
| H | 7.13920637  | -4.67557215 | 1.32236400  |
| N | 7.44243237  | -2.93005115 | 2.88184500  |

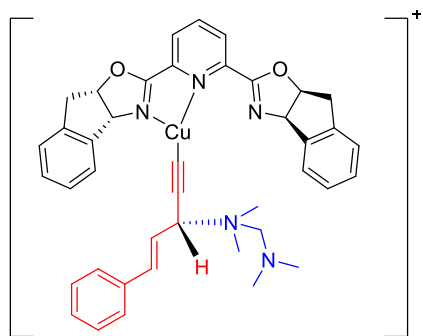

**int-2**

|    |             |             |             |
|----|-------------|-------------|-------------|
| C  | 0.01552662  | -0.27950310 | -0.00020325 |
| C  | -0.57721538 | 0.97750890  | 0.14534575  |
| C  | 1.40589162  | 1.64754590  | 1.32554675  |
| C  | 1.91196062  | 0.35317290  | 1.12646175  |
| H  | -1.56188238 | 1.17048890  | -0.26355425 |
| H  | 2.00138462  | 2.37727890  | 1.86010675  |
| C  | -0.65391138 | -1.38107110 | -0.71025625 |
| N  | -0.11695938 | -2.53460410 | -0.91028125 |
| C  | 3.24574262  | -0.02860610 | 1.63371175  |
| N  | 3.76389662  | -1.18720010 | 1.53464875  |
| C  | 5.17675462  | 0.34868690  | 2.74180675  |
| C  | 5.12093162  | -1.06898410 | 2.08886375  |
| H  | 5.11178862  | 0.35403090  | 3.83238475  |
| N  | 1.22665762  | -0.59132610 | 0.47530475  |
| O  | 3.95140962  | 0.96677590  | 2.24599075  |
| O  | -1.89182138 | -1.17916710 | -1.17877525 |
| H  | 5.29816462  | -1.88819410 | 2.79363575  |
| Cu | 1.59218162  | -3.12340010 | -0.19445625 |
| C  | 0.14395062  | 1.95735990  | 0.82654675  |
| H  | -0.27322638 | 2.94953590  | 0.96515275  |
| C  | -1.12365938 | -3.38311010 | -1.58291025 |
| H  | -0.67816338 | -3.81958910 | -2.48123125 |
| C  | -1.71719538 | -4.41351410 | -0.64899025 |
| C  | -1.06085938 | -5.46544210 | -0.01179225 |
| C  | -3.07740938 | -4.17340510 | -0.43549025 |
| C  | -1.79131238 | -6.28341010 | 0.85148875  |
| H  | 0.00179462  | -5.62735110 | -0.17160425 |
| C  | -3.80585338 | -4.99458110 | 0.42459375  |
| C  | -3.15447438 | -6.04958510 | 1.06700075  |
| H  | -1.30037538 | -7.10631010 | 1.36288175  |
| H  | -4.86398038 | -4.81782010 | 0.59605175  |
| H  | -3.71139738 | -6.69359510 | 1.74109175  |
| C  | -3.57358138 | -2.99634610 | -1.24737225 |
| H  | -4.09373838 | -2.24285310 | -0.64664125 |
| H  | -4.27005338 | -3.31555910 | -2.03214325 |
| C  | -2.30140738 | -2.40263910 | -1.87516125 |
| H  | -2.41698338 | -2.12896510 | -2.92458225 |
| C  | 6.16681062  | -1.00551010 | 0.99568575  |
| C  | 6.40979862  | -1.94804810 | -0.00060825 |
| C  | 6.88660462  | 0.19158690  | 1.05274275  |
| C  | 7.41602462  | -1.69017710 | -0.93397725 |
| H  | 5.81311162  | -2.85253110 | -0.05191825 |
| C  | 7.89269862  | 0.44614290  | 0.12098775  |
| C  | 8.15632762  | -0.50459110 | -0.86807925 |

|   |             |              |             |
|---|-------------|--------------|-------------|
| H | 7.63055562  | -2.41368310  | -1.71350225 |
| H | 8.46116362  | 1.37175290   | 0.15838075  |
| H | 8.93954362  | -0.32006610  | -1.59775125 |
| C | 6.42614262  | 1.06368890   | 2.20137275  |
| H | 6.18717462  | 2.08875390   | 1.89870075  |
| H | 7.18954462  | 1.13261890   | 2.98701975  |
| C | 3.00192462  | -4.22960910  | 0.24706075  |
| C | 3.92344162  | -4.98864610  | 0.54055675  |
| C | 6.18434862  | -5.63783910  | -0.08986025 |
| H | 5.94372462  | -5.53736510  | -1.14406925 |
| C | 7.41397462  | -5.34849510  | 0.36757175  |
| H | 7.58007562  | -5.36348610  | 1.44532375  |
| C | 8.55544562  | -4.90885610  | -0.43590125 |
| C | 9.60299862  | -4.22245110  | 0.19836175  |
| C | 8.61578062  | -5.09338510  | -1.82873225 |
| C | 10.66421162 | -3.70228910  | -0.53865425 |
| H | 9.56477362  | -4.07041510  | 1.27367575  |
| C | 9.67837162  | -4.57938310  | -2.56425025 |
| H | 7.83118562  | -5.64659510  | -2.33652825 |
| C | 10.70271962 | -3.87522710  | -1.92249825 |
| H | 11.45761162 | -3.15982110  | -0.03390425 |
| H | 9.71334262  | -4.72997810  | -3.63908625 |
| H | 11.52971962 | -3.47294910  | -2.49963925 |
| N | 4.50581262  | -7.38912810  | 0.71987775  |
| C | 3.34193962  | -7.54234510  | 1.73411475  |
| H | 3.79643462  | -7.32441310  | 2.70550775  |
| H | 2.65921362  | -6.73168310  | 1.47545675  |
| C | 5.60472262  | -8.33253210  | 1.06553275  |
| H | 6.42383962  | -8.19621210  | 0.36054575  |
| H | 5.95600062  | -8.11245610  | 2.07591075  |
| H | 5.21437762  | -9.34886410  | 1.01389975  |
| C | 4.00990062  | -7.67556010  | -0.65880925 |
| H | 3.29494662  | -6.89686510  | -0.92747925 |
| H | 4.85561062  | -7.66065810  | -1.34599425 |
| H | 3.54615662  | -8.66111110  | -0.65043825 |
| N | 2.73891462  | -8.82890610  | 1.67526175  |
| C | 2.95597262  | -9.68190310  | 2.84452875  |
| H | 2.38383462  | -9.34470810  | 3.72440875  |
| H | 2.64799162  | -10.70433810 | 2.60798775  |
| H | 4.01642562  | -9.70328810  | 3.10790975  |
| C | 1.34226862  | -8.82790610  | 1.23660075  |
| H | 1.03676162  | -9.85068510  | 0.99819275  |
| H | 0.66056162  | -8.43509910  | 2.00914575  |
| H | 1.23068362  | -8.22096510  | 0.33446675  |



|   |            |             |            |
|---|------------|-------------|------------|
| C | 5.02102762 | -5.88326410 | 0.82384975 |
| H | 5.35472962 | -5.82787110 | 1.86829075 |

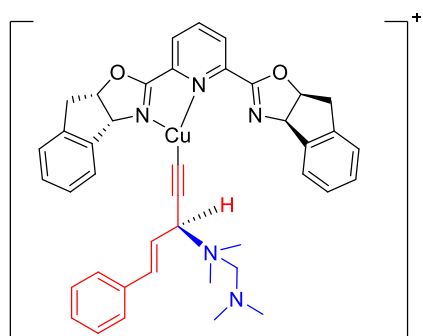

### int-3

|    |             |             |             |
|----|-------------|-------------|-------------|
| C  | -0.21739132 | 0.43478260  | 0.00000000  |
| C  | 0.35218268  | -0.66361040 | 0.65127800  |
| C  | -1.81883932 | -1.09221540 | 1.58671500  |
| C  | -2.28859932 | 0.04106660  | 0.90512200  |
| H  | 1.40192868  | -0.89644740 | 0.51724800  |
| H  | -2.50020932 | -1.66930840 | 2.19987700  |
| C  | 0.57167068  | 1.29758960  | -0.89649300 |
| N  | 0.06384168  | 2.18877660  | -1.67608000 |
| C  | -3.69927932 | 0.46610660  | 1.02313600  |
| N  | -4.16651032 | 1.59409960  | 0.65172300  |
| C  | -5.84072932 | 0.21578460  | 1.69442000  |
| C  | -5.62459932 | 1.47960960  | 0.81404000  |
| H  | -5.99023632 | 0.41325460  | 2.75922800  |
| N  | -1.50298332 | 0.78613060  | 0.12092800  |
| O  | -4.54764132 | -0.45326940 | 1.56574300  |
| O  | 1.90263068  | 1.15786960  | -0.89393900 |
| H  | -6.02680932 | 2.39417060  | 1.26354100  |
| Cu | -1.75910932 | 2.82189660  | -1.63297900 |
| C  | -0.47751632 | -1.44195740 | 1.45704000  |
| H  | -0.08307632 | -2.30987040 | 1.97539900  |
| C  | 1.18373768  | 2.90802260  | -2.32566300 |
| H  | 1.03931268  | 2.88775060  | -3.40911400 |
| C  | 1.35032668  | 4.30423660  | -1.76905800 |
| C  | 0.46649368  | 5.37737660  | -1.88137400 |
| C  | 2.54370568  | 4.41881760  | -1.05061900 |
| C  | 0.79555168  | 6.58067160  | -1.25369200 |
| H  | -0.46024332 | 5.27721760  | -2.43864400 |
| C  | 2.86768168  | 5.62078960  | -0.42111000 |
| C  | 1.98670068  | 6.69978660  | -0.52642200 |
| H  | 0.12949868  | 7.43463560  | -1.34117900 |
| H  | 3.79484468  | 5.72269360  | 0.13585600  |

|   |              |             |             |
|---|--------------|-------------|-------------|
| H | 2.23447068   | 7.64320760  | -0.04856800 |
| C | 3.36082368   | 3.14587660  | -1.11169700 |
| H | 3.64500768   | 2.76336460  | -0.12568300 |
| H | 4.28936068   | 3.29548860  | -1.67539100 |
| C | 2.45032468   | 2.13792460  | -1.83722500 |
| H | 2.96062768   | 1.56303960  | -2.61011800 |
| C | -6.31525232  | 1.12213960  | -0.48944900 |
| C | -6.21423932  | 1.76815560  | -1.72136200 |
| C | -7.08615932  | -0.03617440 | -0.34121100 |
| C | -6.95306832  | 1.27077160  | -2.79800600 |
| H | -5.55564332  | 2.62063560  | -1.84702900 |
| C | -7.82177832  | -0.52941240 | -1.41781400 |
| C | -7.76024232  | 0.13849960  | -2.64384600 |
| H | -6.89263632  | 1.76388160  | -3.76356300 |
| H | -8.42478732  | -1.42720840 | -1.31179100 |
| H | -8.32888332  | -0.23715540 | -3.48943900 |
| C | -6.96859332  | -0.60549740 | 1.05614400  |
| H | -6.73461032  | -1.67505740 | 1.06926600  |
| H | -7.89440032  | -0.47311740 | 1.63105100  |
| C | -3.21675632  | 3.94781760  | -1.63852300 |
| C | -4.05874132  | 4.80800960  | -1.39180600 |
| C | -6.35053932  | 5.17985660  | -0.62493400 |
| H | -6.39780032  | 4.14859260  | -0.29574400 |
| C | -7.46732432  | 5.83369960  | -0.98562200 |
| H | -7.37930732  | 6.86805760  | -1.32149500 |
| C | -8.82651732  | 5.28724760  | -0.98218900 |
| C | -9.08244432  | 3.90656060  | -0.88196700 |
| C | -9.91553832  | 6.16821860  | -1.09191900 |
| C | -10.38910032 | 3.43124660  | -0.87440700 |
| H | -8.26115832  | 3.19954560  | -0.84850700 |
| C | -11.22420632 | 5.69058560  | -1.07688800 |
| H | -9.73037532  | 7.23559160  | -1.18493000 |
| C | -11.46475232 | 4.32020360  | -0.96600800 |
| H | -10.56736532 | 2.36175460  | -0.81219900 |
| H | -12.05435932 | 6.38567360  | -1.15833800 |
| H | -12.48371332 | 3.94491660  | -0.96348500 |
| N | -4.36170032  | 6.12900960  | 0.65926300  |
| C | -2.90989232  | 6.64351260  | 0.44231500  |
| H | -2.42144632  | 5.84011060  | -0.10627400 |
| H | -3.02461632  | 7.50889360  | -0.21753200 |
| C | -5.18106032  | 7.20293360  | 1.28568700  |
| H | -5.17778332  | 8.07920860  | 0.63365700  |
| H | -6.20170232  | 6.84234360  | 1.40763900  |
| H | -4.74002832  | 7.45036960  | 2.25124000  |

|   |             |            |             |
|---|-------------|------------|-------------|
| C | -4.33847632 | 4.92985960 | 1.55275400  |
| H | -5.36551332 | 4.67477360 | 1.81274300  |
| H | -3.86908232 | 4.09883060 | 1.02266600  |
| H | -3.78524732 | 5.19986160 | 2.45139500  |
| C | -1.12965332 | 6.09129860 | 2.00259600  |
| H | -1.40540532 | 5.04401360 | 1.85474900  |
| H | -0.24171432 | 6.30402860 | 1.38818100  |
| H | -0.86880632 | 6.23099260 | 3.05605200  |
| N | -2.26339032 | 6.95918860 | 1.66827800  |
| C | -1.96521632 | 8.37439460 | 1.87955600  |
| H | -2.84860132 | 8.98477760 | 1.67459900  |
| H | -1.68188332 | 8.53344560 | 2.92411200  |
| H | -1.13847932 | 8.73126960 | 1.24250200  |
| C | -4.97000232 | 5.74555660 | -0.77020500 |
| H | -5.00817732 | 6.71730560 | -1.27758900 |

### 7.3 Condensed dual descriptor and condensed Fukui function of int-1

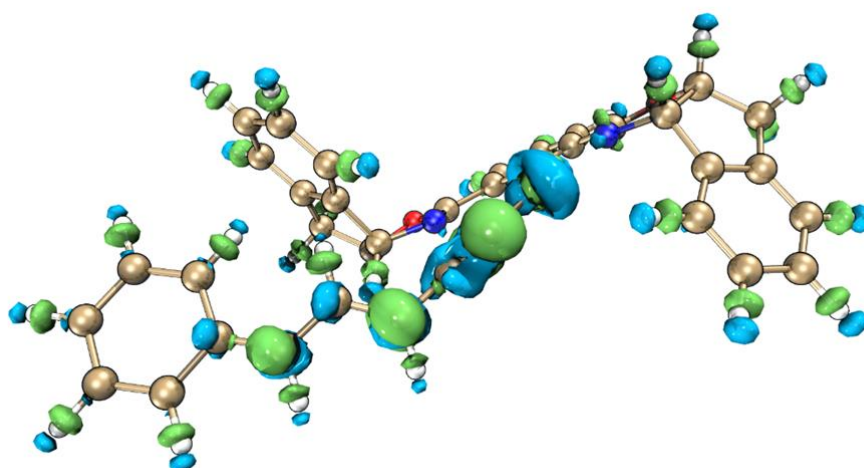

Isosurface of condensed dual descriptor

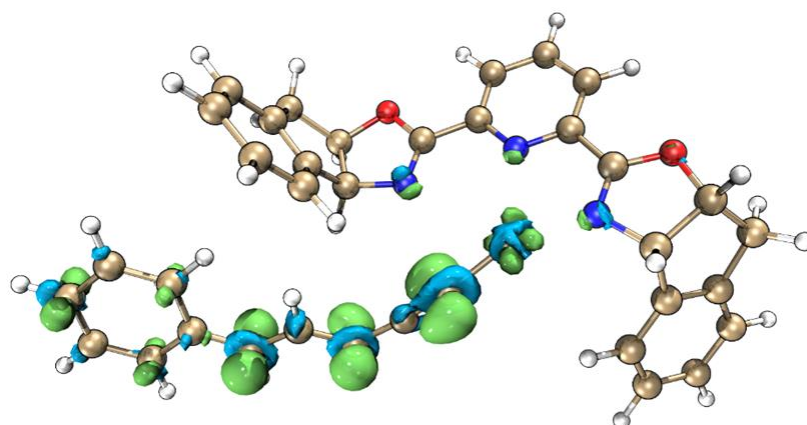

Isosurface of condensed  $f^+$  Fukui function

## 7.4 Wave functions analysis of int-1

Hirshfeld charges, condensed Fukui functions and condensed dual descriptors (CDD)

Units used below are "e" (elementary charge)

| Atom   | $q_{(N)}$ | $q_{(N+1)}$ | $q_{(N-1)}$ | $f^-$   | $f^+$   | $f^0$   | CDD     |
|--------|-----------|-------------|-------------|---------|---------|---------|---------|
| 1(C)   | 0.0594    | 0.0552      | 0.0619      | 0.0025  | 0.0043  | 0.0034  | 0.0018  |
| 2(C)   | -0.0135   | -0.0284     | 0.0035      | 0.0171  | 0.0149  | 0.0160  | -0.0022 |
| 3(C)   | -0.0118   | -0.0233     | 0.0060      | 0.0177  | 0.0115  | 0.0146  | -0.0062 |
| 4(C)   | 0.0721    | 0.0715      | 0.0787      | 0.0067  | 0.0006  | 0.0036  | -0.0061 |
| 5(H)   | 0.0665    | 0.0566      | 0.0777      | 0.0111  | 0.0100  | 0.0106  | -0.0011 |
| 6(H)   | 0.0653    | 0.0577      | 0.0767      | 0.0114  | 0.0076  | 0.0095  | -0.0038 |
| 7(C)   | 0.1601    | 0.1502      | 0.1731      | 0.0130  | 0.0099  | 0.0115  | -0.0031 |
| 8(N)   | -0.1537   | -0.1493     | -0.1616     | -0.0079 | -0.0044 | -0.0061 | 0.0035  |
| 9(C)   | 0.1370    | 0.1270      | 0.1426      | 0.0056  | 0.0100  | 0.0078  | 0.0045  |
| 10(N)  | -0.1558   | -0.1385     | -0.1629     | -0.0071 | -0.0173 | -0.0122 | -0.0102 |
| 11(C)  | 0.0684    | 0.0646      | 0.0734      | 0.0050  | 0.0038  | 0.0044  | -0.0013 |
| 12(C)  | 0.0198    | 0.0251      | 0.0193      | -0.0005 | -0.0053 | -0.0029 | -0.0048 |
| 13(H)  | 0.0458    | 0.0402      | 0.0523      | 0.0065  | 0.0056  | 0.0061  | -0.0009 |
| 14(N)  | -0.1011   | -0.0979     | -0.0996     | 0.0015  | -0.0032 | -0.0008 | -0.0048 |
| 15(O)  | -0.1340   | -0.1478     | -0.1215     | 0.0124  | 0.0139  | 0.0132  | 0.0014  |
| 16(O)  | -0.1091   | -0.1217     | -0.0897     | 0.0194  | 0.0126  | 0.0160  | -0.0068 |
| 17(H)  | 0.0367    | 0.0466      | 0.0349      | -0.0018 | -0.0098 | -0.0058 | -0.0080 |
| 18(Cu) | 0.2477    | 0.1576      | 0.4726      | 0.2249  | 0.0902  | 0.1575  | -0.1348 |
| 19(C)  | 0.0057    | -0.0106     | 0.0266      | 0.0210  | 0.0163  | 0.0186  | -0.0047 |
| 20(H)  | 0.0711    | 0.0598      | 0.0845      | 0.0134  | 0.0113  | 0.0123  | -0.0021 |
| 21(C)  | 0.0313    | 0.0308      | 0.0339      | 0.0025  | 0.0005  | 0.0015  | -0.0020 |
| 22(H)  | 0.0537    | 0.0508      | 0.0604      | 0.0067  | 0.0030  | 0.0048  | -0.0037 |
| 23(C)  | -0.0187   | -0.0144     | -0.0203     | -0.0016 | -0.0043 | -0.0030 | -0.0027 |
| 24(C)  | -0.0361   | -0.0285     | -0.0267     | 0.0094  | -0.0076 | 0.0009  | -0.0170 |
| 25(C)  | -0.0047   | -0.0082     | 0.0117      | 0.0164  | 0.0035  | 0.0099  | -0.0129 |
| 26(C)  | -0.0319   | -0.0336     | -0.0096     | 0.0223  | 0.0017  | 0.0120  | -0.0207 |
| 27(H)  | 0.0449    | 0.0514      | 0.0447      | -0.0001 | -0.0065 | -0.0033 | -0.0064 |
| 28(C)  | -0.0364   | -0.0460     | -0.0091     | 0.0273  | 0.0096  | 0.0184  | -0.0177 |
| 29(C)  | -0.0276   | -0.0363     | -0.0102     | 0.0174  | 0.0087  | 0.0131  | -0.0087 |
| 30(H)  | 0.0518    | 0.0503      | 0.0624      | 0.0105  | 0.0015  | 0.0060  | -0.0091 |
| 31(H)  | 0.0516    | 0.0439      | 0.0657      | 0.0141  | 0.0077  | 0.0109  | -0.0064 |
| 32(H)  | 0.0535    | 0.0464      | 0.0663      | 0.0128  | 0.0072  | 0.0100  | -0.0056 |
| 33(C)  | -0.0442   | -0.0480     | -0.0374     | 0.0068  | 0.0038  | 0.0053  | -0.0030 |
| 34(H)  | 0.0490    | 0.0442      | 0.0579      | 0.0089  | 0.0048  | 0.0069  | -0.0041 |
| 35(H)  | 0.0507    | 0.0432      | 0.0635      | 0.0128  | 0.0075  | 0.0101  | -0.0053 |
| 36(C)  | 0.0786    | 0.0738      | 0.0873      | 0.0087  | 0.0048  | 0.0068  | -0.0039 |
| 37(H)  | 0.0543    | 0.0474      | 0.0655      | 0.0111  | 0.0069  | 0.0090  | -0.0042 |
| 38(C)  | -0.0132   | -0.0044     | -0.0151     | -0.0019 | -0.0089 | -0.0054 | -0.0070 |

|       |         |         |         |         |         |         |         |
|-------|---------|---------|---------|---------|---------|---------|---------|
| 39(C) | -0.0381 | -0.0278 | -0.0435 | -0.0054 | -0.0103 | -0.0079 | -0.0049 |
| 40(C) | -0.0033 | -0.0059 | 0.0021  | 0.0054  | 0.0026  | 0.0040  | -0.0028 |
| 41(C) | -0.0359 | -0.0380 | -0.0302 | 0.0057  | 0.0021  | 0.0039  | -0.0036 |
| 42(H) | 0.0451  | 0.0515  | 0.0396  | -0.0055 | -0.0064 | -0.0059 | -0.0009 |
| 43(C) | -0.0369 | -0.0463 | -0.0262 | 0.0107  | 0.0094  | 0.0101  | -0.0013 |
| 44(C) | -0.0337 | -0.0417 | -0.0202 | 0.0135  | 0.0080  | 0.0108  | -0.0055 |
| 45(H) | 0.0506  | 0.0458  | 0.0555  | 0.0049  | 0.0048  | 0.0048  | -0.0002 |
| 46(H) | 0.0510  | 0.0418  | 0.0595  | 0.0086  | 0.0092  | 0.0089  | 0.0006  |
| 47(H) | 0.0515  | 0.0427  | 0.0604  | 0.0088  | 0.0088  | 0.0088  | -0.0001 |
| 48(C) | -0.0453 | -0.0491 | -0.0415 | 0.0038  | 0.0037  | 0.0038  | -0.0001 |
| 49(H) | 0.0489  | 0.0402  | 0.0564  | 0.0075  | 0.0087  | 0.0081  | 0.0012  |
| 50(H) | 0.0465  | 0.0418  | 0.0529  | 0.0064  | 0.0047  | 0.0055  | -0.0018 |
| 51(C) | -0.1483 | -0.2683 | -0.1506 | -0.0023 | 0.1199  | 0.0588  | 0.1222  |
| 52(C) | -0.0618 | -0.1071 | -0.0131 | 0.0486  | 0.0454  | 0.0470  | -0.0033 |
| 53(C) | 0.0511  | -0.0463 | 0.0700  | 0.0189  | 0.0974  | 0.0581  | 0.0785  |
| 54(H) | 0.0715  | 0.0377  | 0.0860  | 0.0145  | 0.0337  | 0.0241  | 0.0192  |
| 55(C) | -0.0275 | -0.0490 | 0.0009  | 0.0284  | 0.0215  | 0.0249  | -0.0069 |
| 56(H) | 0.0484  | 0.0346  | 0.0552  | 0.0068  | 0.0138  | 0.0103  | 0.0070  |
| 57(C) | 0.0312  | -0.0587 | 0.0655  | 0.0344  | 0.0899  | 0.0621  | 0.0556  |
| 58(H) | 0.0598  | 0.0309  | 0.0744  | 0.0146  | 0.0288  | 0.0217  | 0.0143  |
| 59(C) | -0.0006 | -0.0081 | 0.0189  | 0.0195  | 0.0075  | 0.0135  | -0.0119 |
| 60(C) | -0.0139 | -0.0506 | 0.0124  | 0.0263  | 0.0366  | 0.0315  | 0.0103  |
| 61(C) | -0.0169 | -0.0482 | 0.0017  | 0.0187  | 0.0313  | 0.0250  | 0.0126  |
| 62(C) | -0.0243 | -0.0516 | -0.0011 | 0.0232  | 0.0273  | 0.0252  | 0.0041  |
| 63(H) | 0.0552  | 0.0368  | 0.0686  | 0.0134  | 0.0184  | 0.0159  | 0.0049  |
| 64(C) | -0.0247 | -0.0494 | -0.0059 | 0.0188  | 0.0247  | 0.0218  | 0.0059  |
| 65(H) | 0.0415  | 0.0305  | 0.0469  | 0.0053  | 0.0111  | 0.0082  | 0.0057  |
| 66(C) | -0.0019 | -0.0572 | 0.0419  | 0.0438  | 0.0553  | 0.0496  | 0.0115  |
| 67(H) | 0.0599  | 0.0387  | 0.0755  | 0.0156  | 0.0212  | 0.0184  | 0.0055  |
| 68(H) | 0.0561  | 0.0377  | 0.0681  | 0.0119  | 0.0184  | 0.0152  | 0.0065  |
| 69(H) | 0.0616  | 0.0350  | 0.0805  | 0.0189  | 0.0266  | 0.0228  | 0.0077  |

Condensed local electrophilicity/nucleophilicity index ( $e^*eV$ )

| Atom | Electrophilicity | Nucleophilicity |
|------|------------------|-----------------|
| 1(C) | 0.02322          | 0.00161         |
| 2(C) | 0.08113          | 0.01103         |
| 3(C) | 0.06302          | 0.01148         |
| 4(C) | 0.00324          | 0.00431         |
| 5(H) | 0.05458          | 0.00719         |
| 6(H) | 0.04138          | 0.00735         |
| 7(C) | 0.05417          | 0.00842         |
| 8(N) | -0.02395         | -0.00510        |
| 9(C) | 0.05489          | 0.00360         |

---

|        |          |          |
|--------|----------|----------|
| 10(N)  | -0.09459 | -0.00458 |
| 11(C)  | 0.02051  | 0.00326  |
| 12(C)  | -0.02904 | -0.00032 |
| 13(H)  | 0.03076  | 0.00421  |
| 14(N)  | -0.01765 | 0.00099  |
| 15(O)  | 0.07580  | 0.00804  |
| 16(O)  | 0.06880  | 0.01255  |
| 17(H)  | -0.05376 | -0.00117 |
| 18(Cu) | 0.14544  |          |
| 19(C)  | 0.08879  | 0.01355  |
| 20(H)  | 0.06166  | 0.00866  |
| 21(C)  | 0.00276  | 0.00163  |
| 22(H)  | 0.01615  | 0.00431  |
| 23(C)  | -0.02347 | -0.00105 |
| 24(C)  | -0.04132 | 0.00608  |
| 25(C)  | 0.01917  | 0.01059  |
| 26(C)  | 0.00918  | 0.01444  |
| 27(H)  | -0.03577 | -0.00008 |
| 28(C)  | 0.05228  | 0.01766  |
| 29(C)  | 0.04767  | 0.01128  |
| 30(H)  | 0.00812  | 0.00682  |
| 31(H)  | 0.04196  | 0.00911  |
| 32(H)  | 0.03929  | 0.00825  |
| 33(C)  | 0.02057  | 0.00440  |
| 34(H)  | 0.02646  | 0.00576  |
| 35(H)  | 0.04082  | 0.00827  |
| 36(C)  | 0.02616  | 0.00565  |
| 37(H)  | 0.03781  | 0.00719  |
| 38(C)  | -0.04851 | -0.00123 |
| 39(C)  | -0.05638 | -0.00348 |
| 40(C)  | 0.01409  | 0.00347  |
| 41(C)  | 0.01140  | 0.00367  |
| 42(H)  | -0.03502 | -0.00354 |
| 43(C)  | 0.05148  | 0.00693  |
| 44(C)  | 0.04380  | 0.00872  |
| 45(H)  | 0.02595  | 0.00319  |
| 46(H)  | 0.05001  | 0.00553  |
| 47(H)  | 0.04792  | 0.00572  |
| 48(C)  | 0.02025  | 0.00247  |
| 49(H)  | 0.04756  | 0.00488  |
| 50(H)  | 0.02543  | 0.00415  |
| 51(C)  | 0.65516  | -0.00148 |
| 52(C)  | 0.24776  | 0.03145  |
| 53(C)  | 0.53204  | 0.01223  |

---

---

|       |         |         |
|-------|---------|---------|
| 54(H) | 0.18419 | 0.00938 |
| 55(C) | 0.11758 | 0.01835 |
| 56(H) | 0.07527 | 0.00440 |
| 57(C) | 0.49123 | 0.02222 |
| 58(H) | 0.15760 | 0.00942 |
| 59(C) | 0.04121 | 0.01260 |
| 60(C) | 0.20000 | 0.01701 |
| 61(C) | 0.17099 | 0.01208 |
| 62(C) | 0.14895 | 0.01499 |
| 63(H) | 0.10028 | 0.00868 |
| 64(C) | 0.13499 | 0.01217 |
| 65(H) | 0.06057 | 0.00345 |
| 66(C) | 0.30220 | 0.02833 |
| 67(H) | 0.11558 | 0.01010 |
| 68(H) | 0.10057 | 0.00772 |
| 69(H) | 0.14533 | 0.01222 |

---

## 8. Referances

1. J.-S. Ma, H.-Y. Lu, Y.-W. Chen, W.-C. Zhao, Y.-Z. Sun, R.-P. Li, H.-X. Wang, G.-Q. Lin and Z.-T. He, Copper-catalysed convergent regio- and enantioselective alkynylallylic substitution, *Nat. Synth.*, 2022, **2**, 37–48.
2. Y.-J. Xie, J.-H. Hu, Y.-Y. Wang, C.-G. Xia and H.-M. Huang, Palladium-Catalyzed Vinylation of Aminals with Simple Alkenes: A New Strategy to Construct Allylamines, *J. Am. Chem. Soc.*, 2012, **134**, 20613–20616.
3. Y. Liu, Y.-J. Xie, H.-L. Wang and H.-M. Huang, Enantioselective Aminomethylation of Conjugated Dienes with Aminals Enabled by Chiral Palladium Complex-Catalyzed C–N Bond Activation, *J. Am. Chem. Soc.*, 2016, **138**, 4314–4317.
4. Gaussian 09, Revision E.01, M. J. Frisch, G. W. Trucks, H. B. Schlegel, G. E. Scuseria, M. A. Robb, J. R. Cheeseman, G. Scalmani, V. Barone, B. Mennucci, G. A. Petersson, H. Nakatsuji, M. Caricato, X. Li, H. P. Hratchian, A. F. Izmaylov, J. Bloino, G. Zheng, J. L. Sonnenberg, M. Hada, M. Ehara, K. Toyota, R. Fukuda, J. Hasegawa, M. Ishida, T. Nakajima, Y. Honda, O. Kitao, H. Nakai, T. Vreven, J. A. Montgomery, Jr., J. E. Peralta, F. Ogliaro, M. Bearpark, J. J. Heyd, E. Brothers, K. N. Kudin, V. N. Staroverov, T. Keith, R. Kobayashi, J. Normand, K. Raghavachari, A. Rendell, J. C. Burant, S. S. Iyengar, J. Tomasi, M. Cossi, N. Rega, J. M. Millam, M. Klene, J. E. Knox, J. B. Cross, V. Bakken, C. Adamo, J. Jaramillo, R. Gomperts, R. E. Stratmann, O. Yazyev, A. J. Austin, R. Cammi, C. Pomelli, J. W. Ochterski, R. L. Martin, K. Morokuma, V. G. Zakrzewski, G. A. Voth, P. Salvador, J. J. Dannenberg, S. Dapprich, A. D. Daniels, O. Farkas, J. B. Foresman, J. V. Ortiz, J. Cioslowski, and D. J. Fox, Gaussian, Inc., Wallingford CT, 2013.
5. T. Lu and F.-W. Chen, Multiwfn: A Multifunctional Wavefunction Analyzer, *J. Comput. Chem.*, 2012, **33**, 580–592.
6. T. Lu and Q. Chen, Realization of conceptual density functional theory and information-theoretic approach in Multiwfn program. In: Liu S, ed. *Conceptual Density Functional Theory*. Wiley-VCH; 2022, 631–647.



## **9. Copies of $^1\text{H}$ NMR, $^{13}\text{C}$ NMR and $^{19}\text{F}$ NMR spectra**

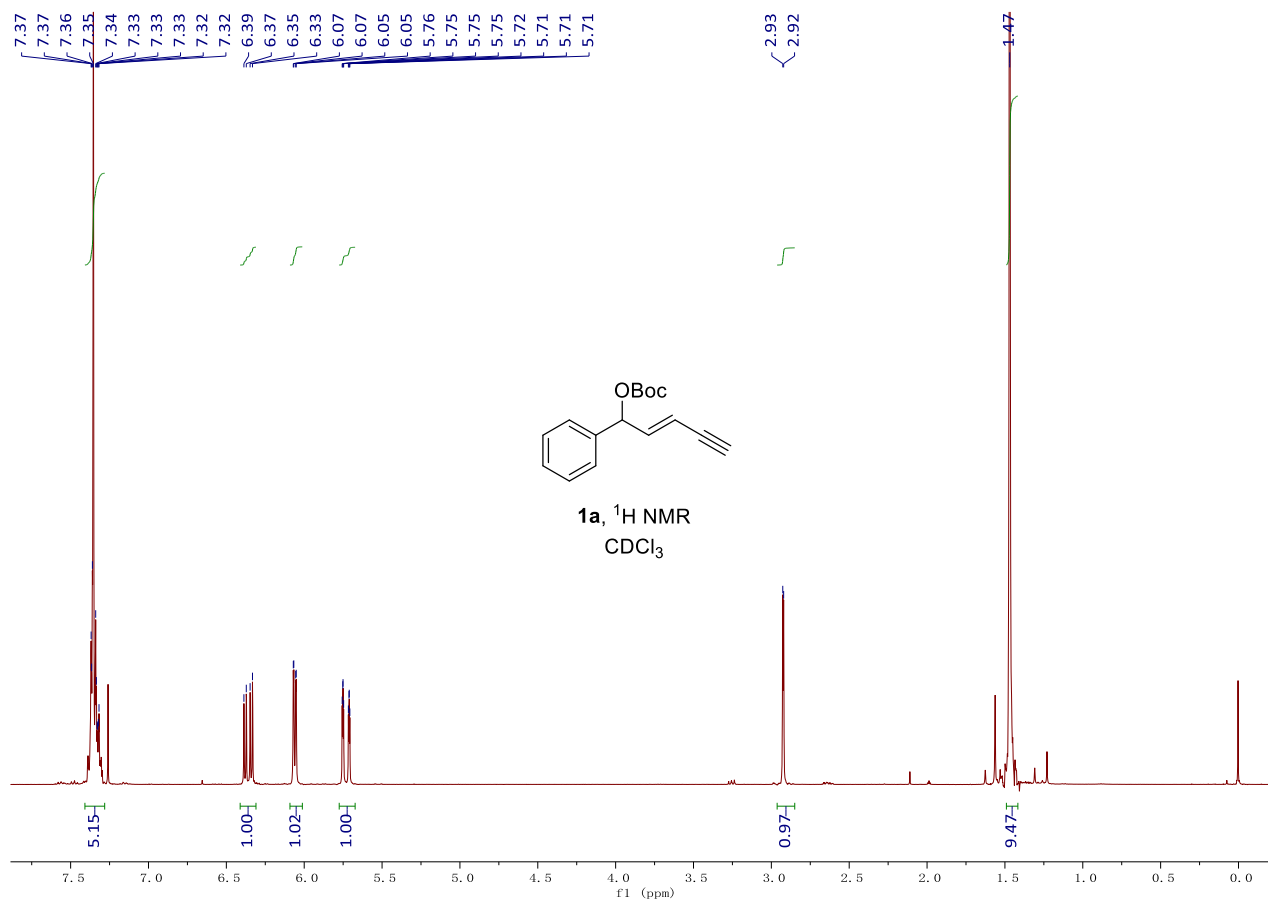

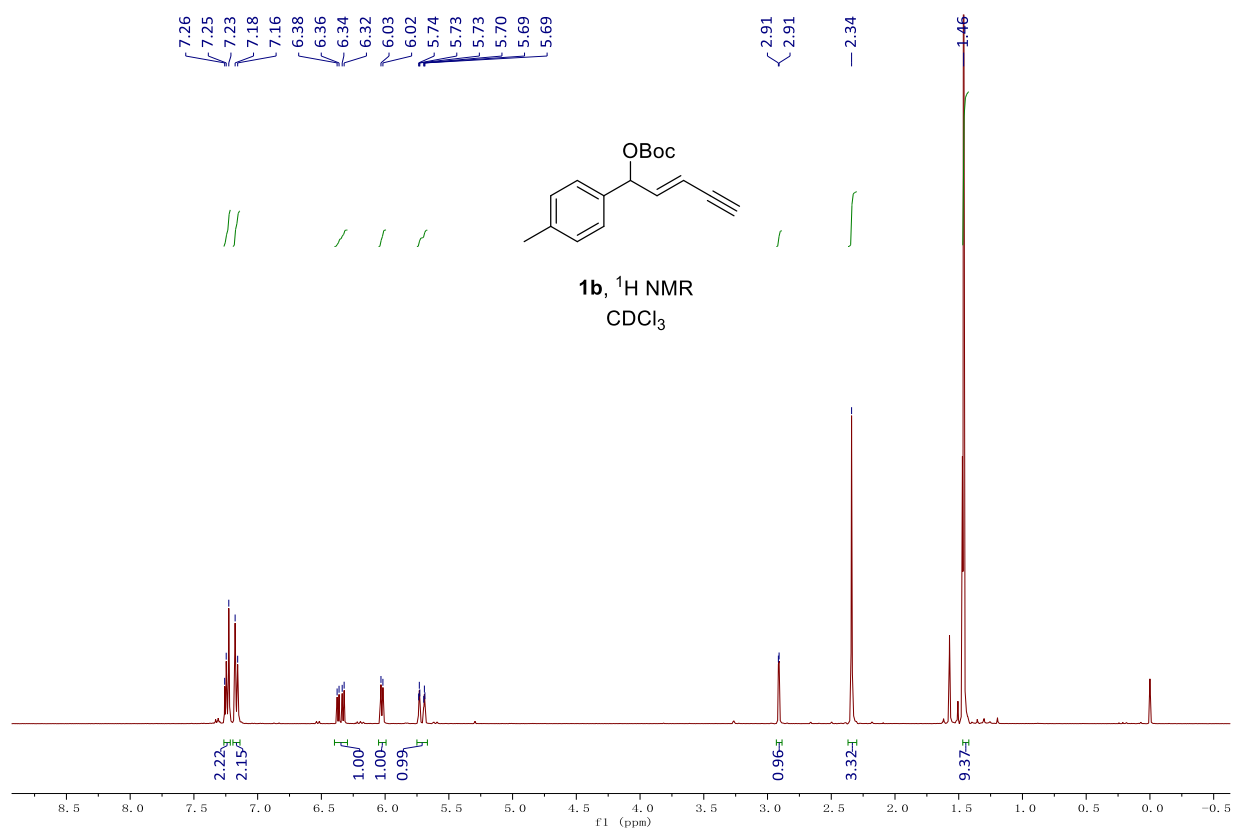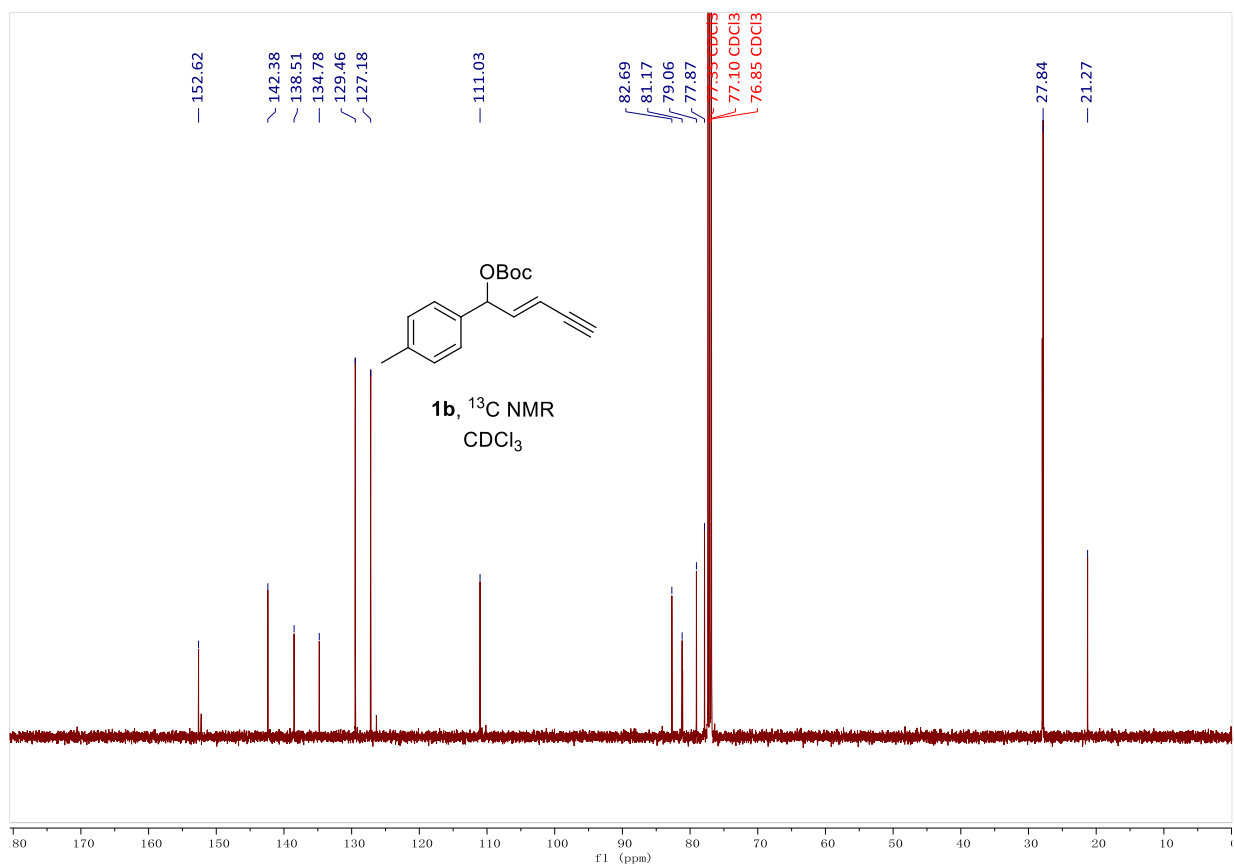

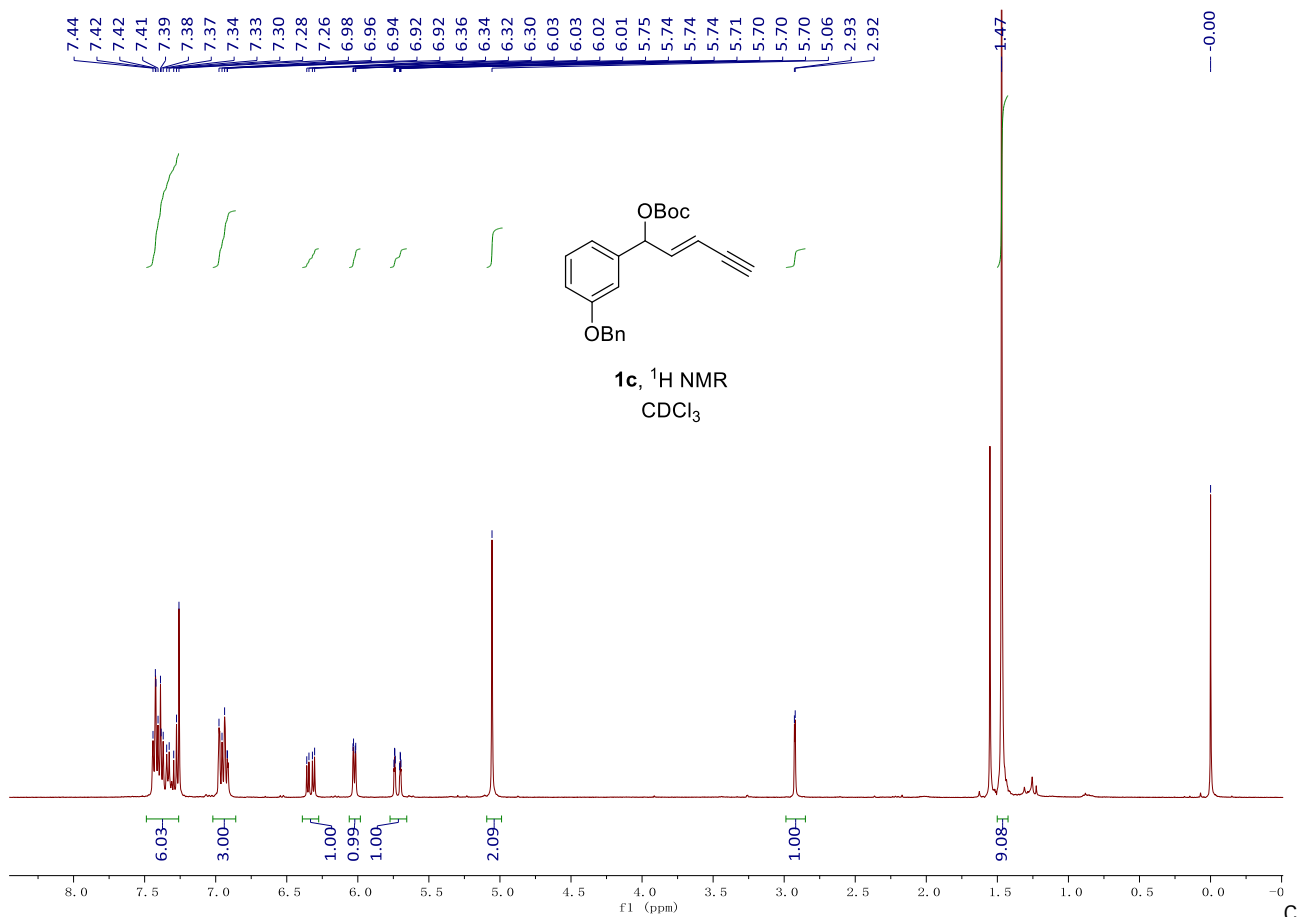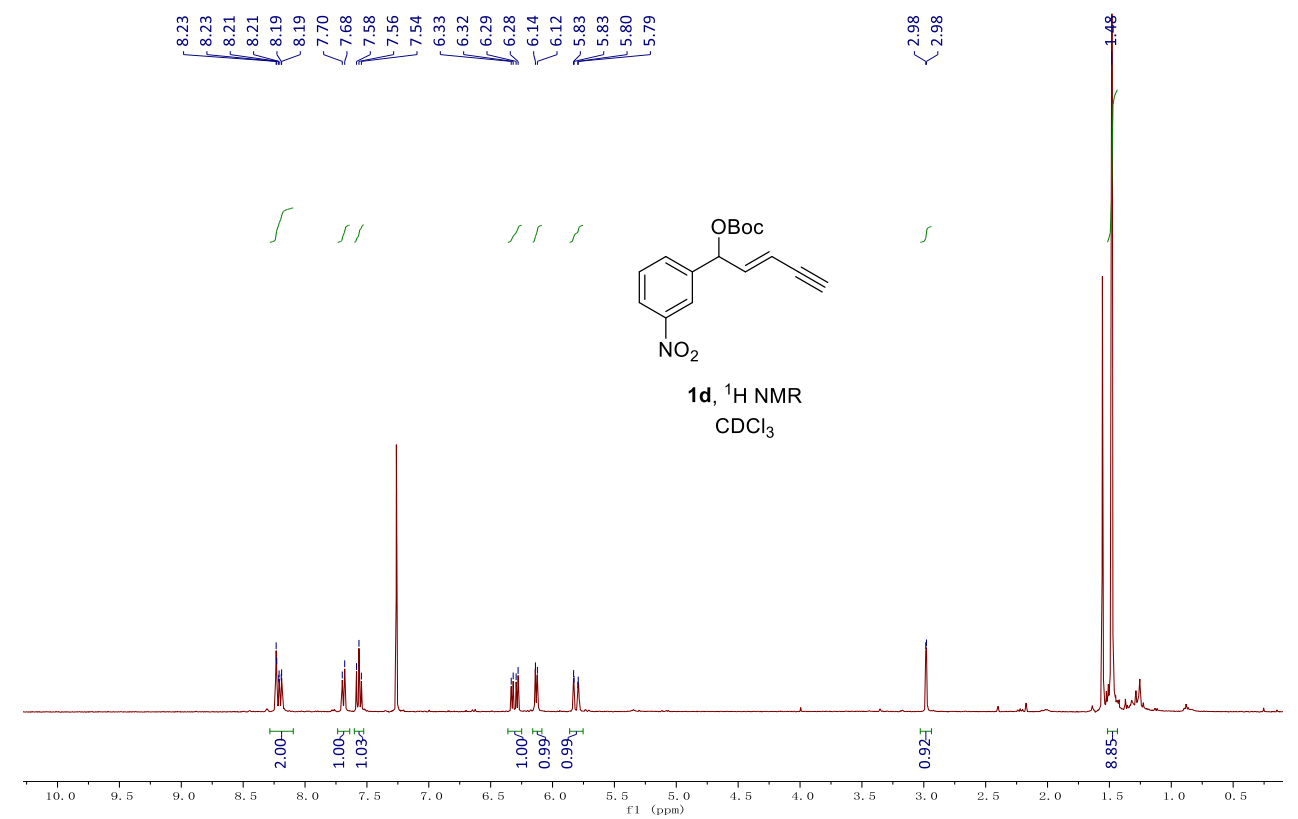



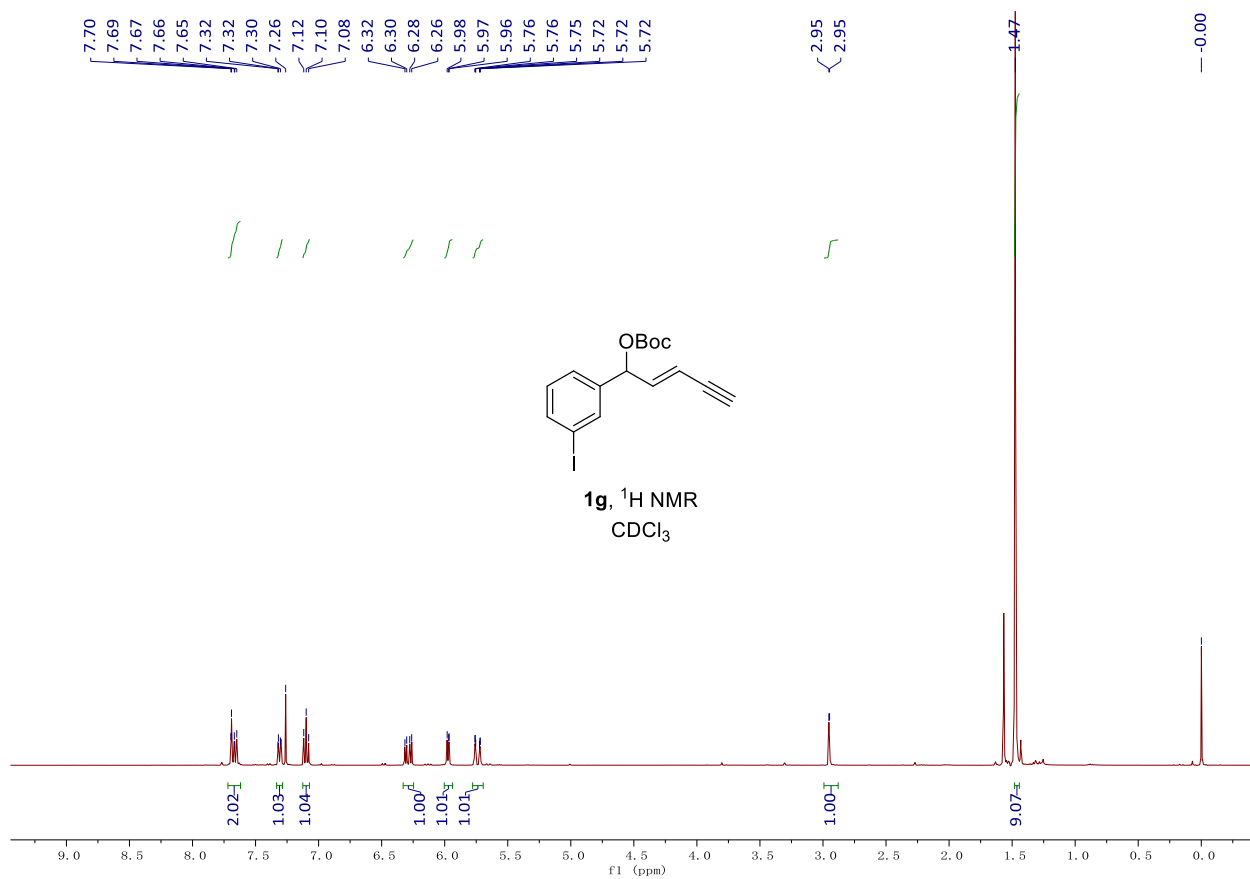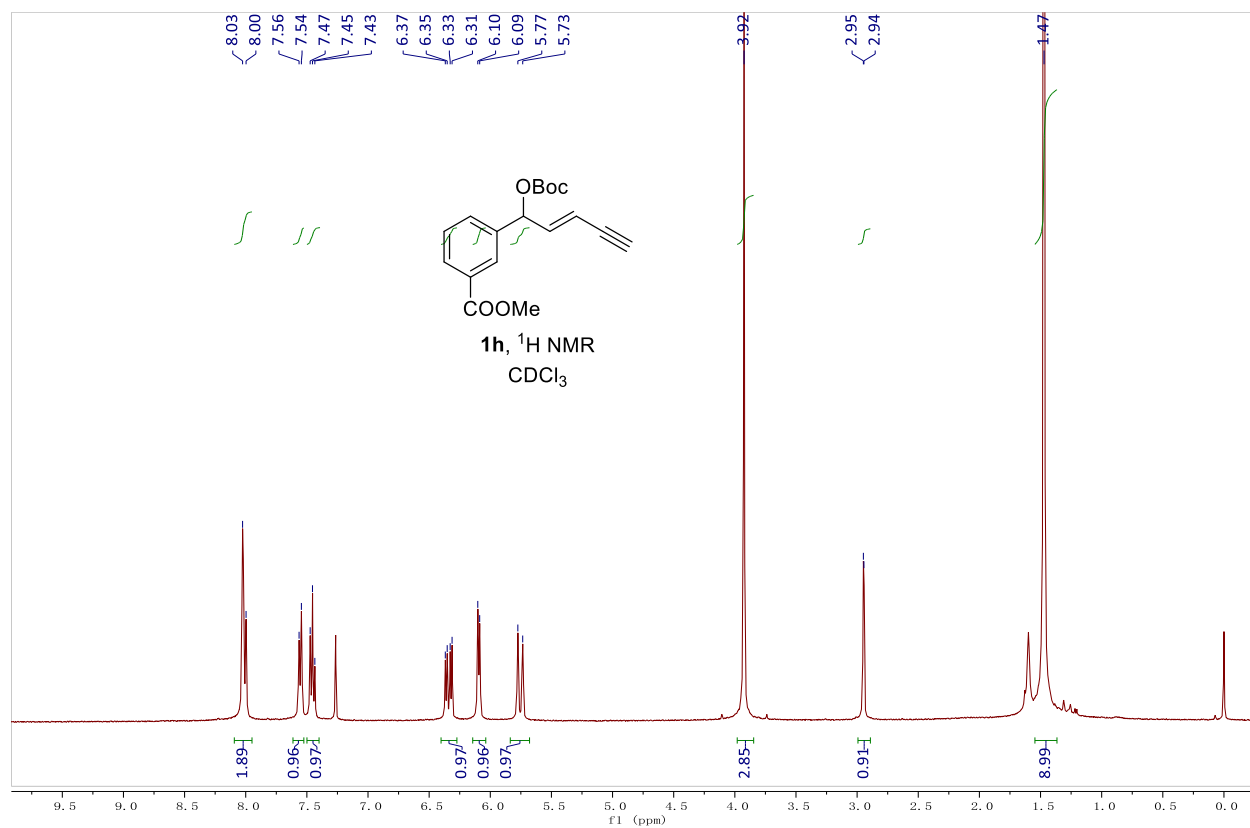

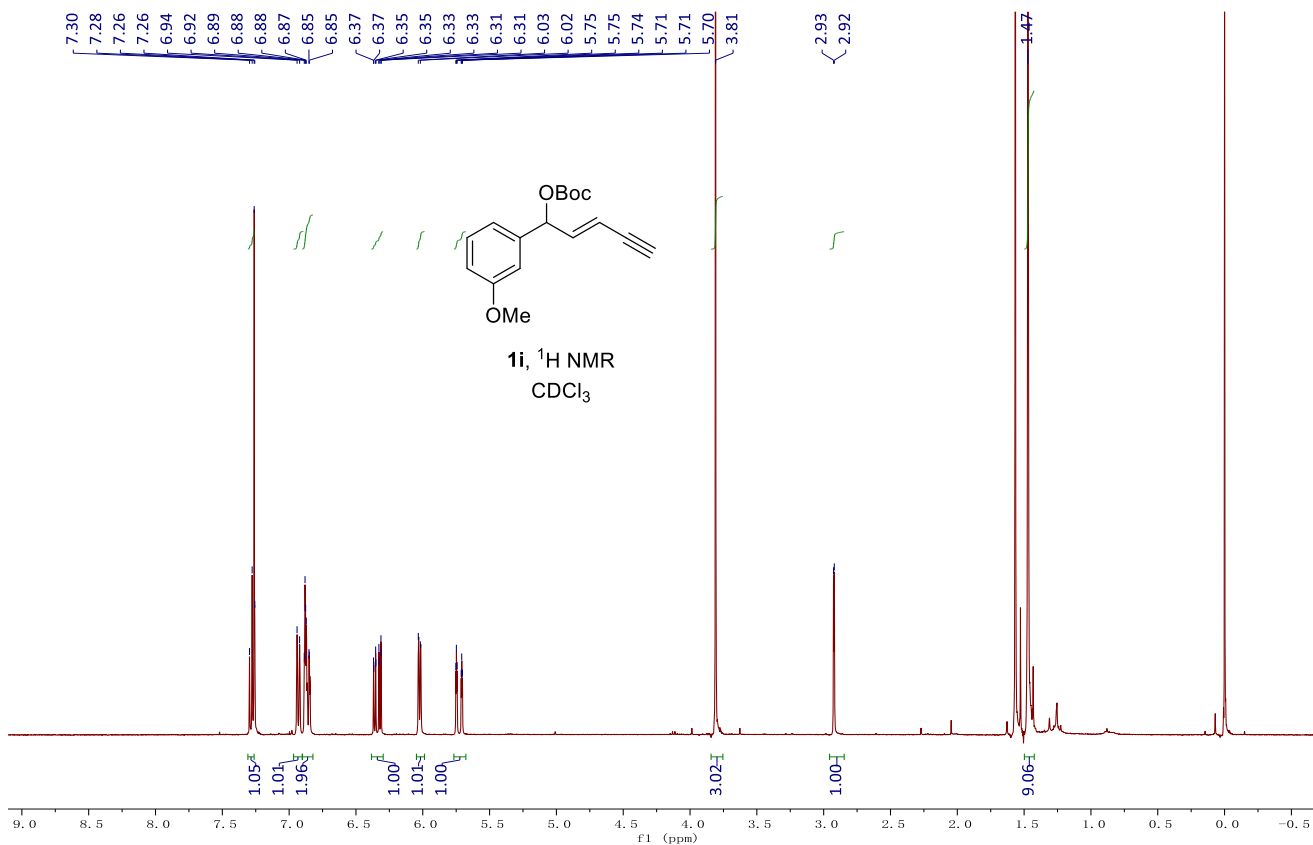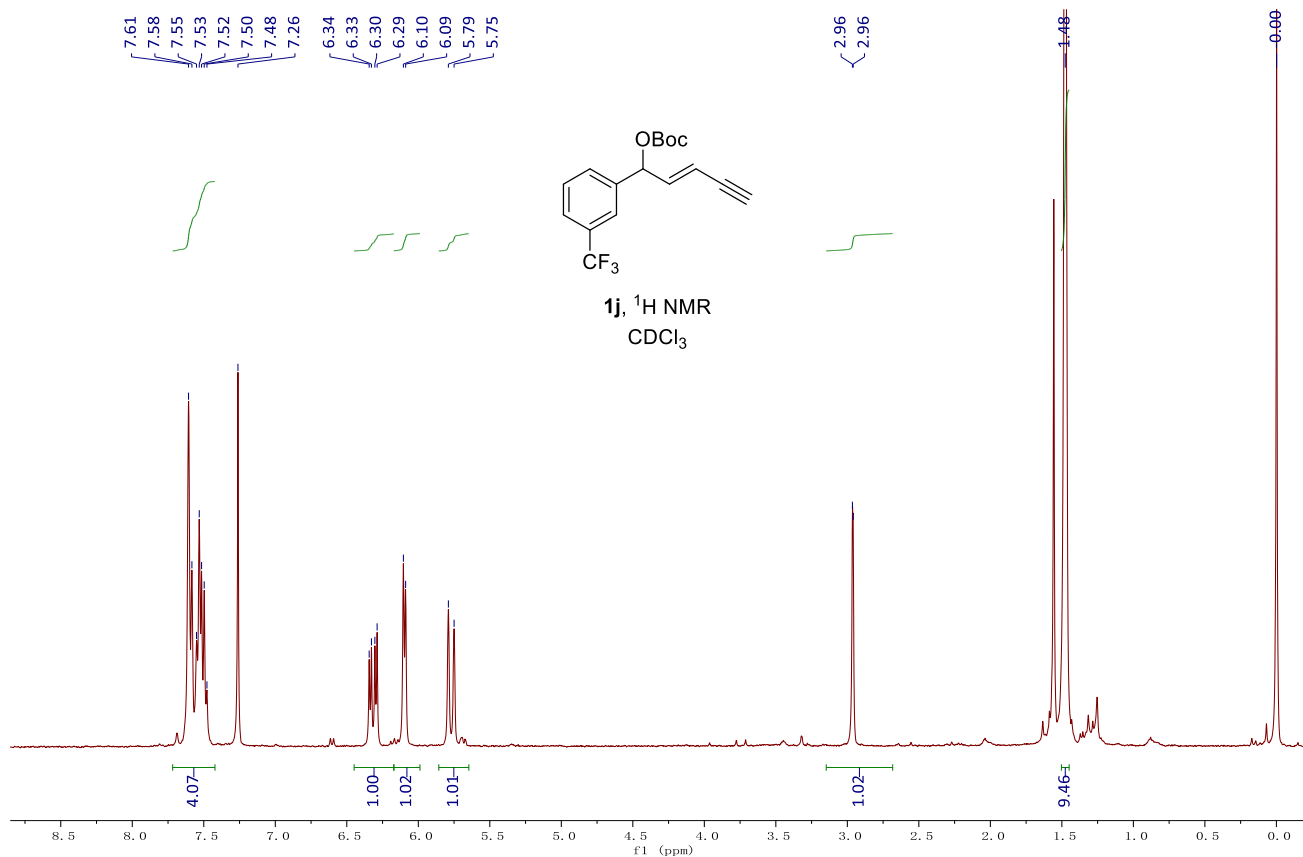





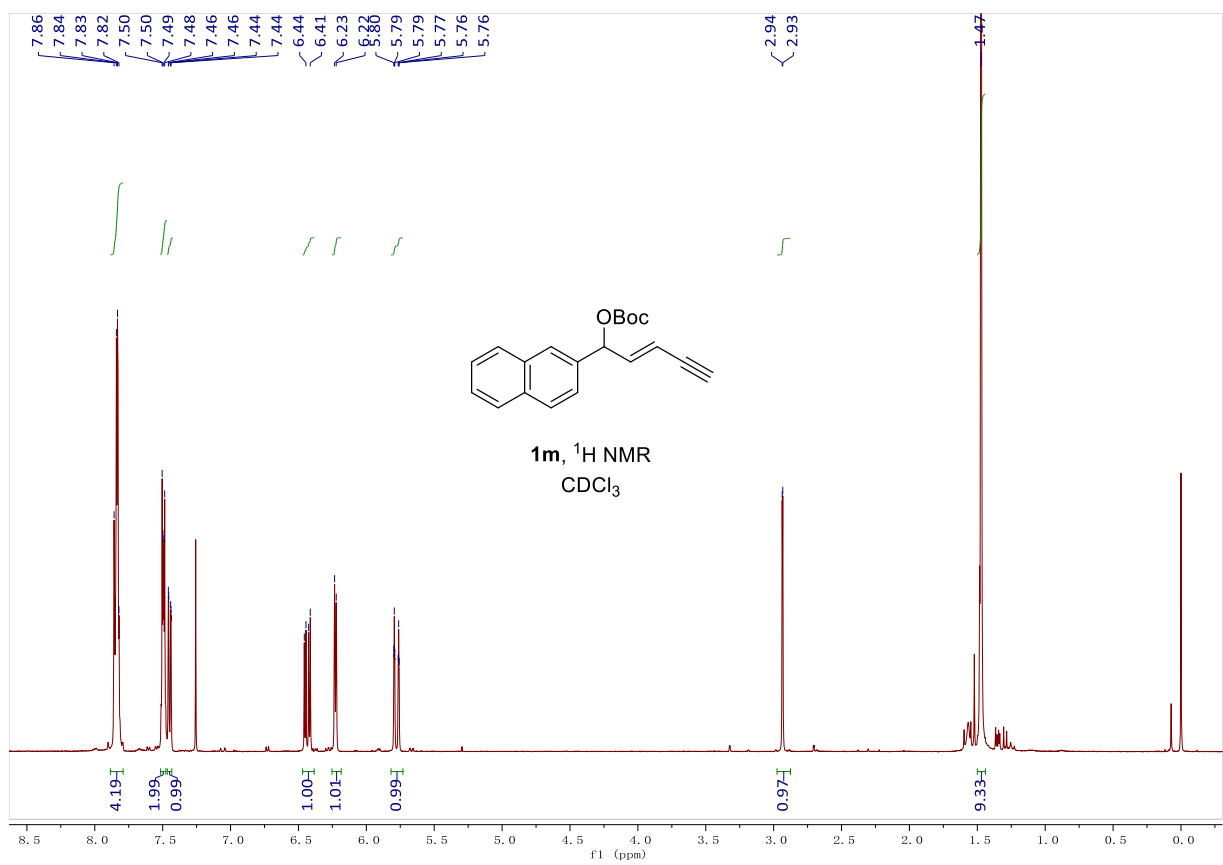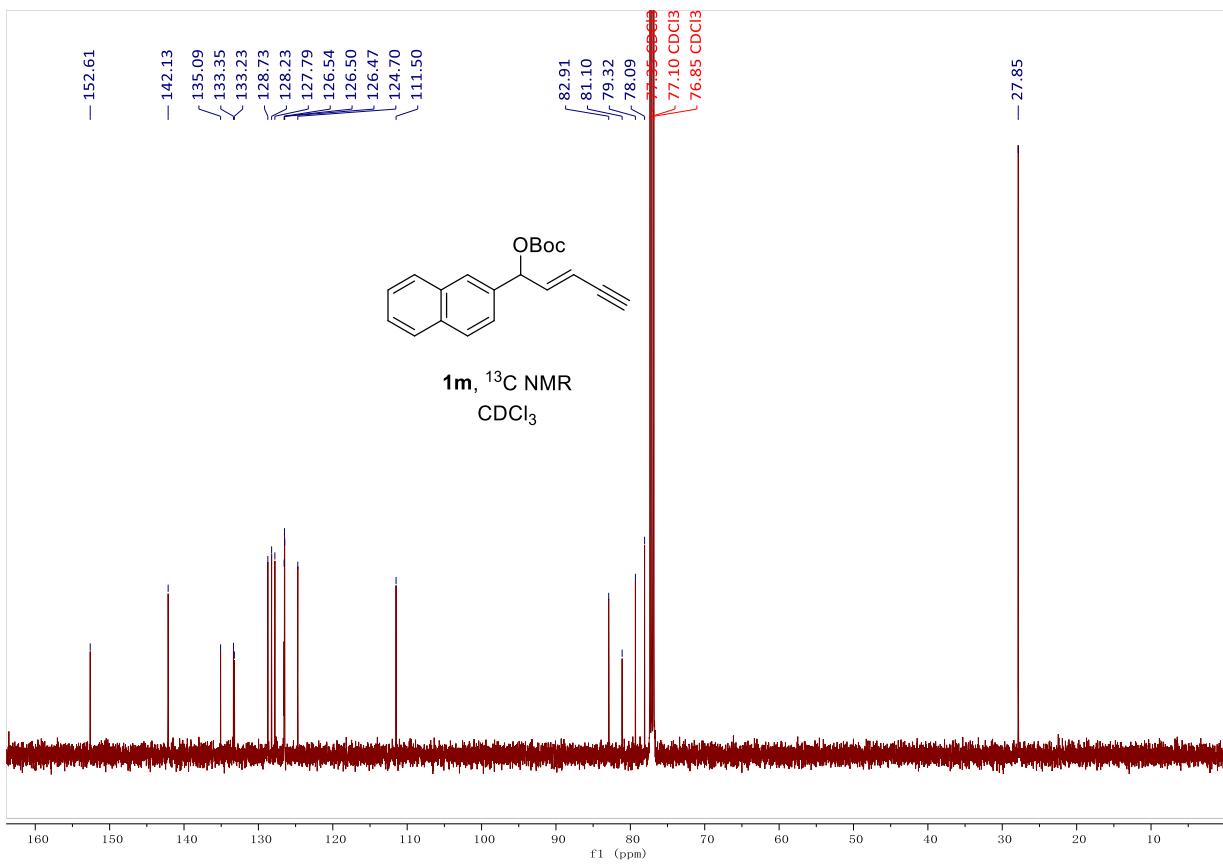

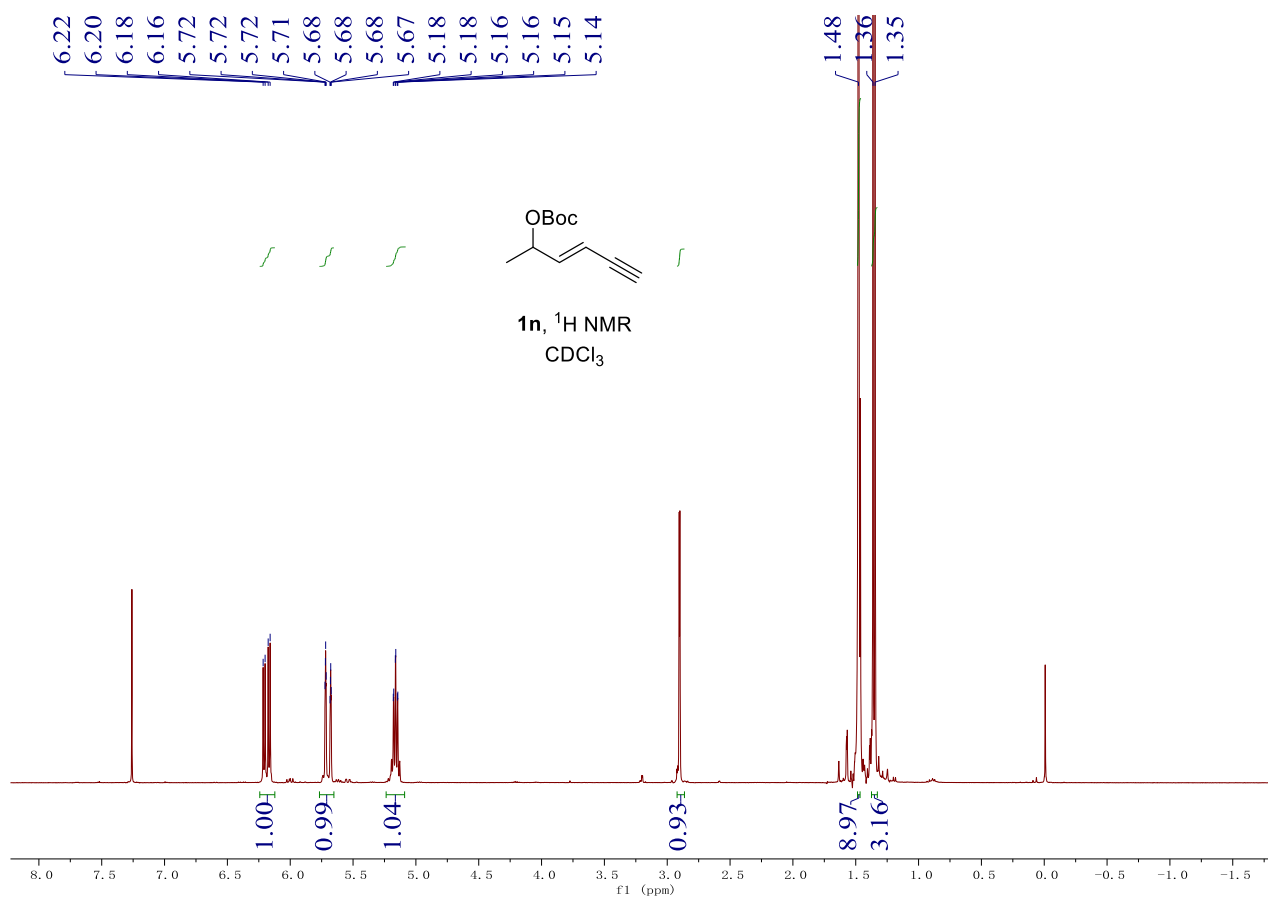

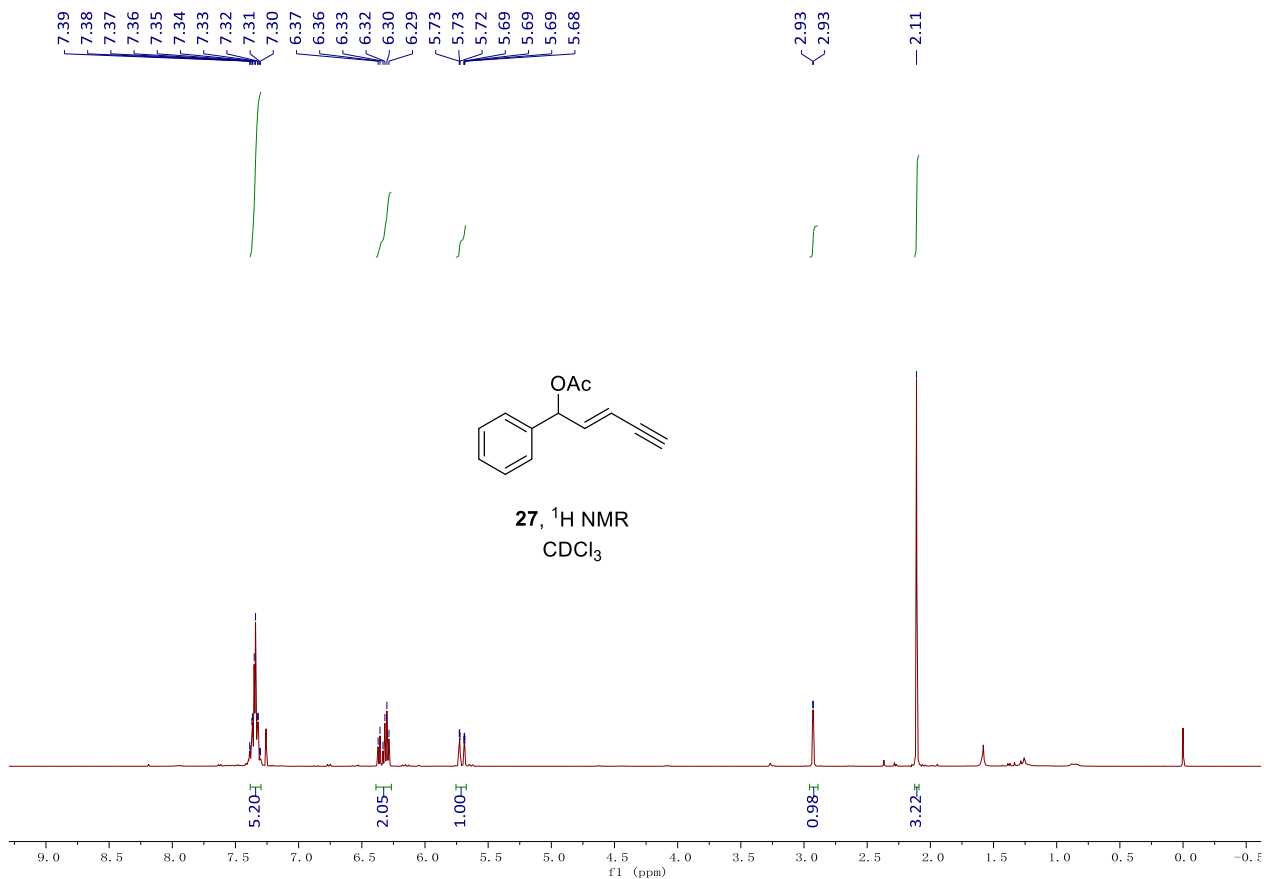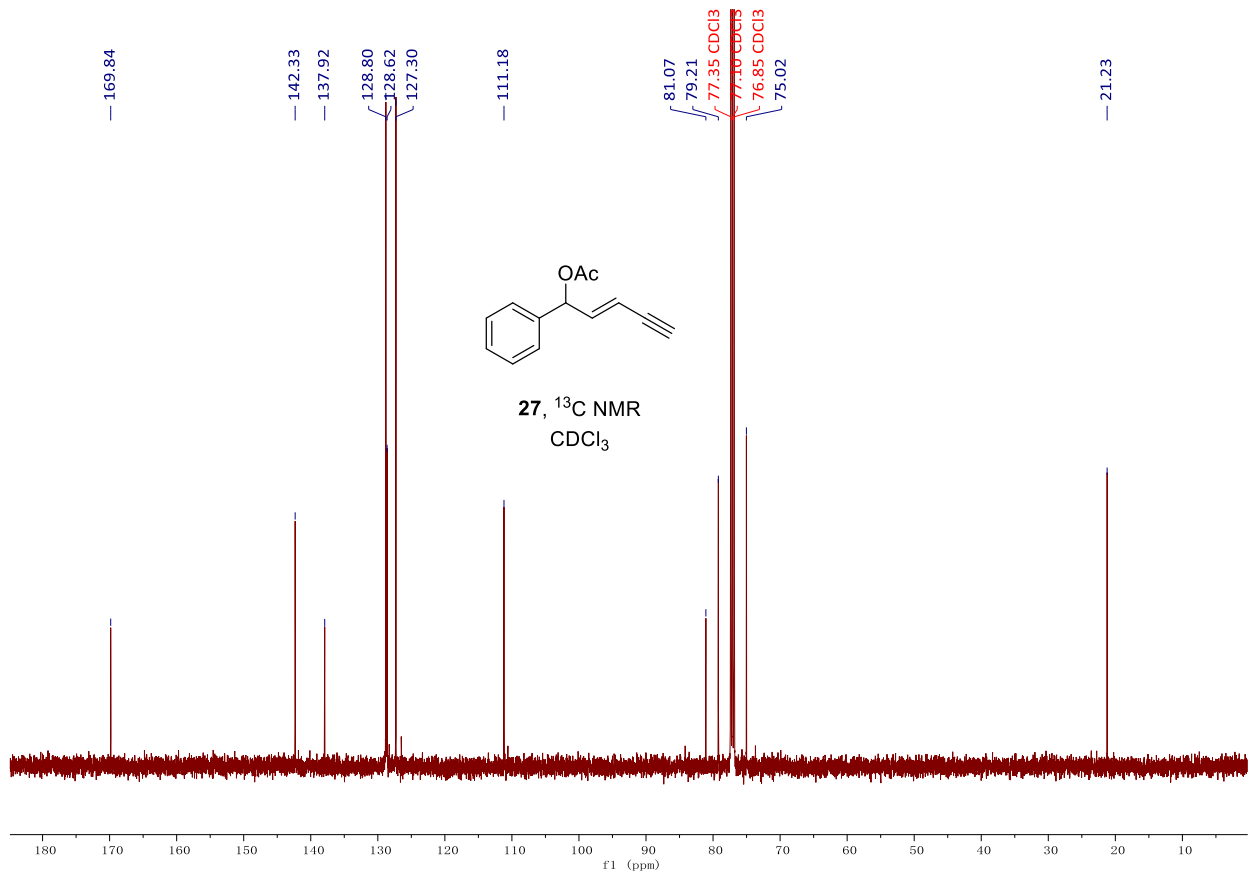

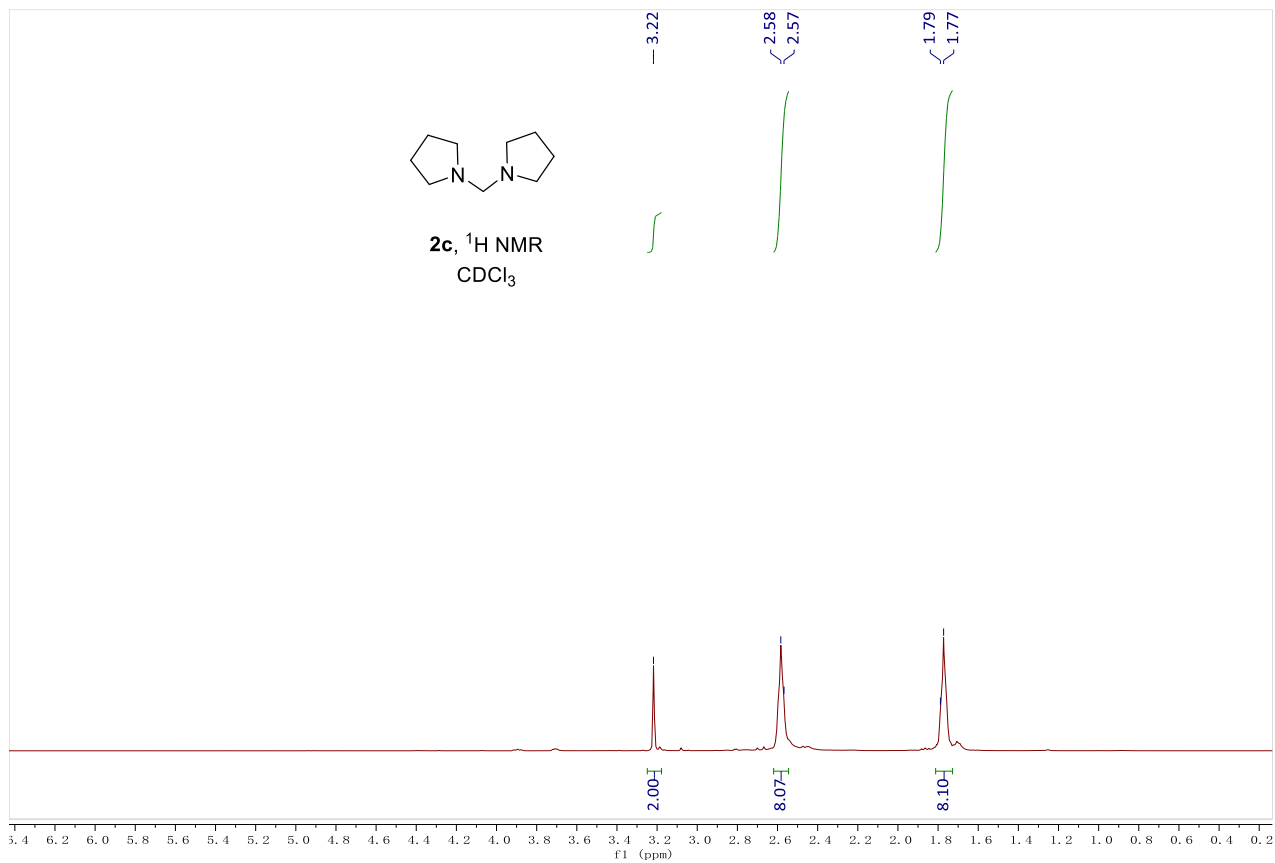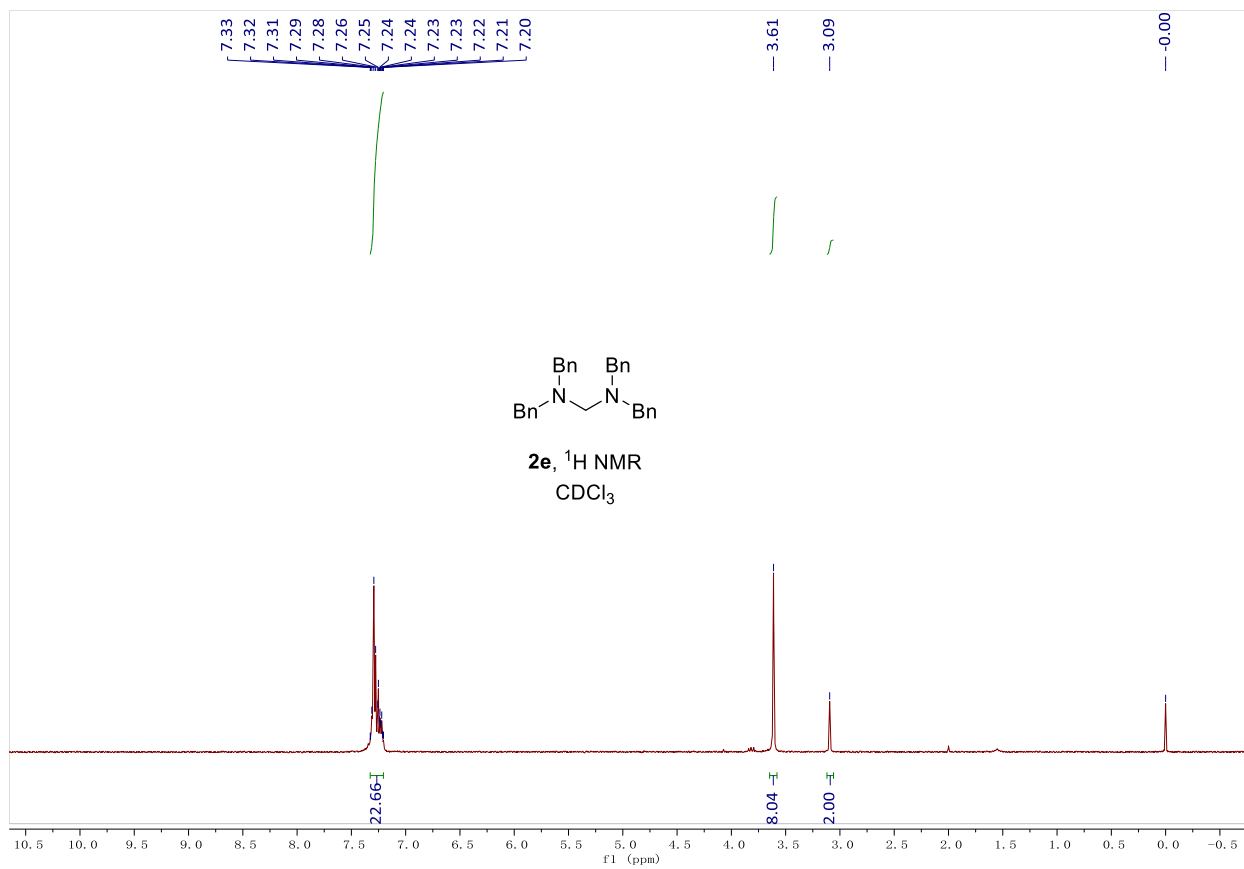



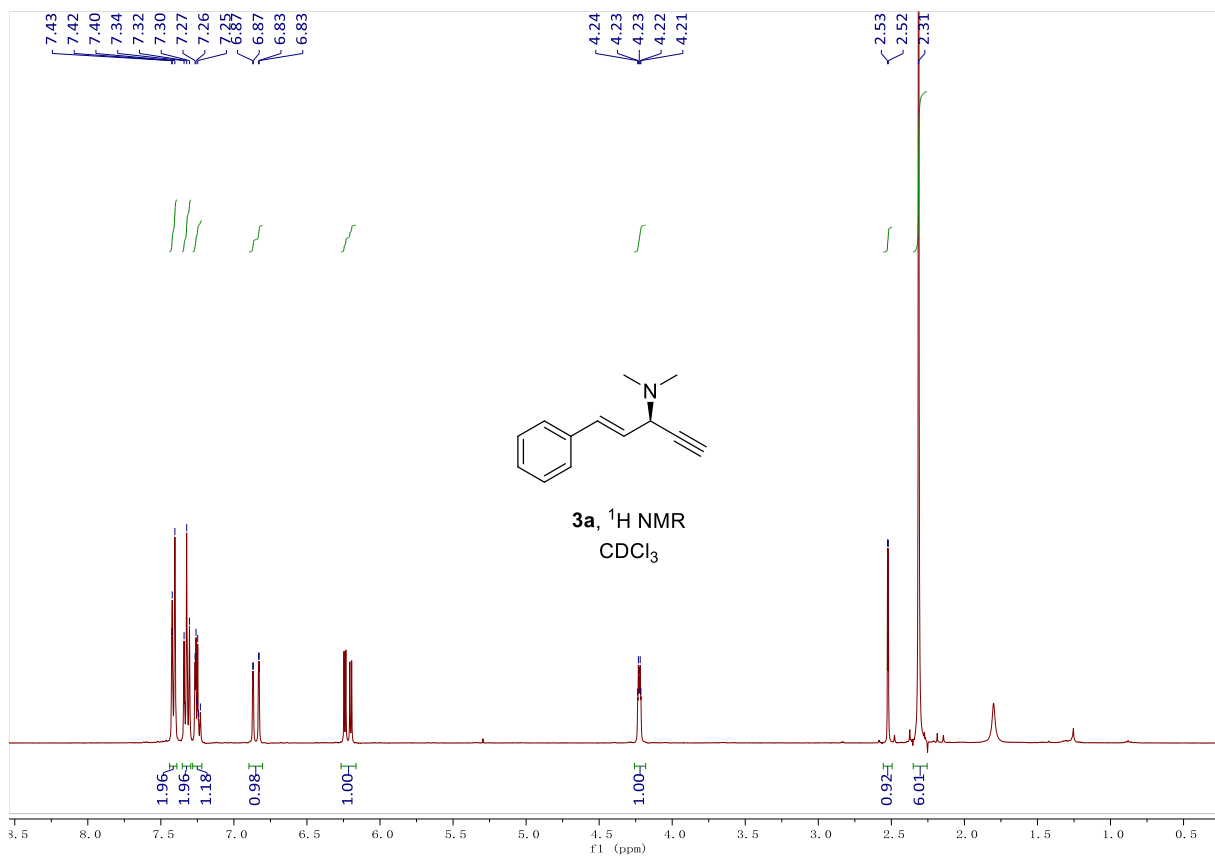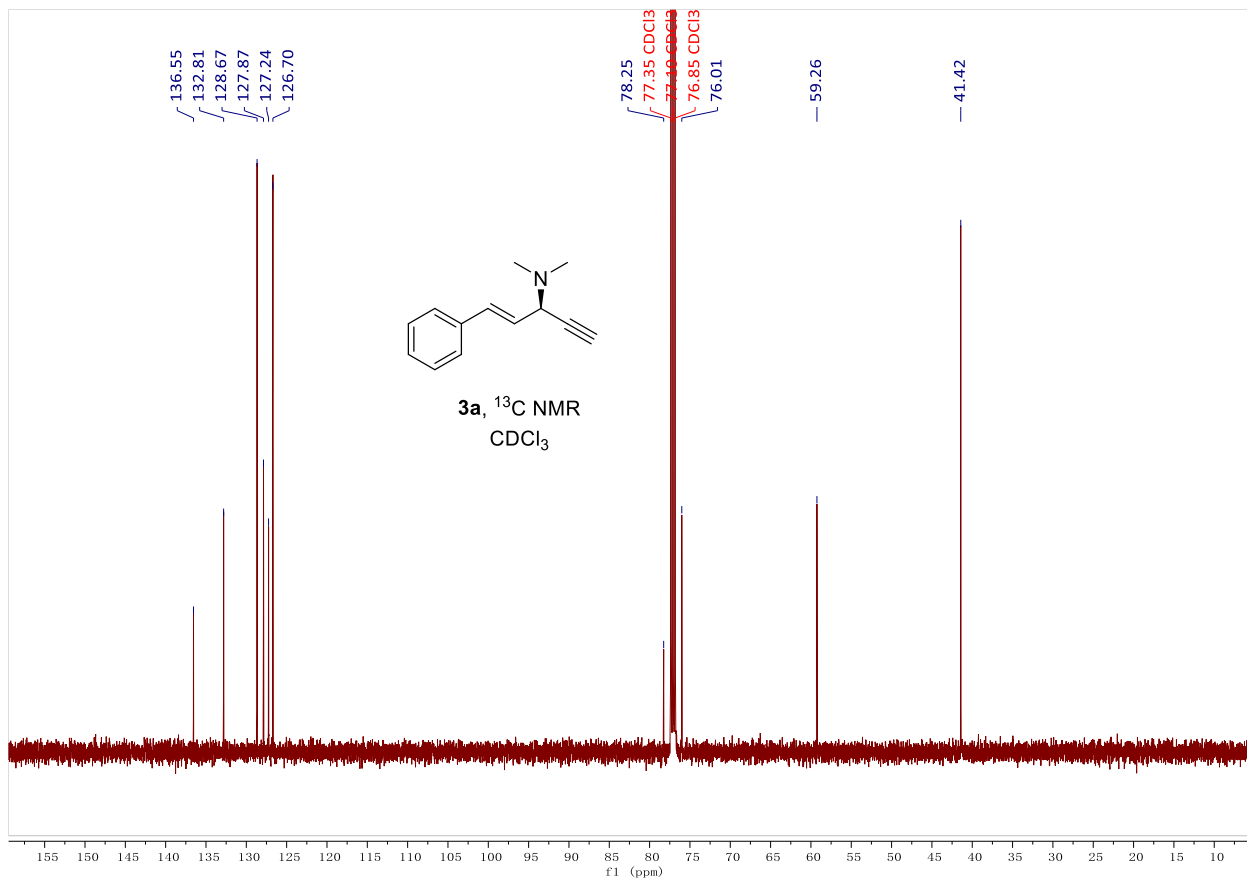

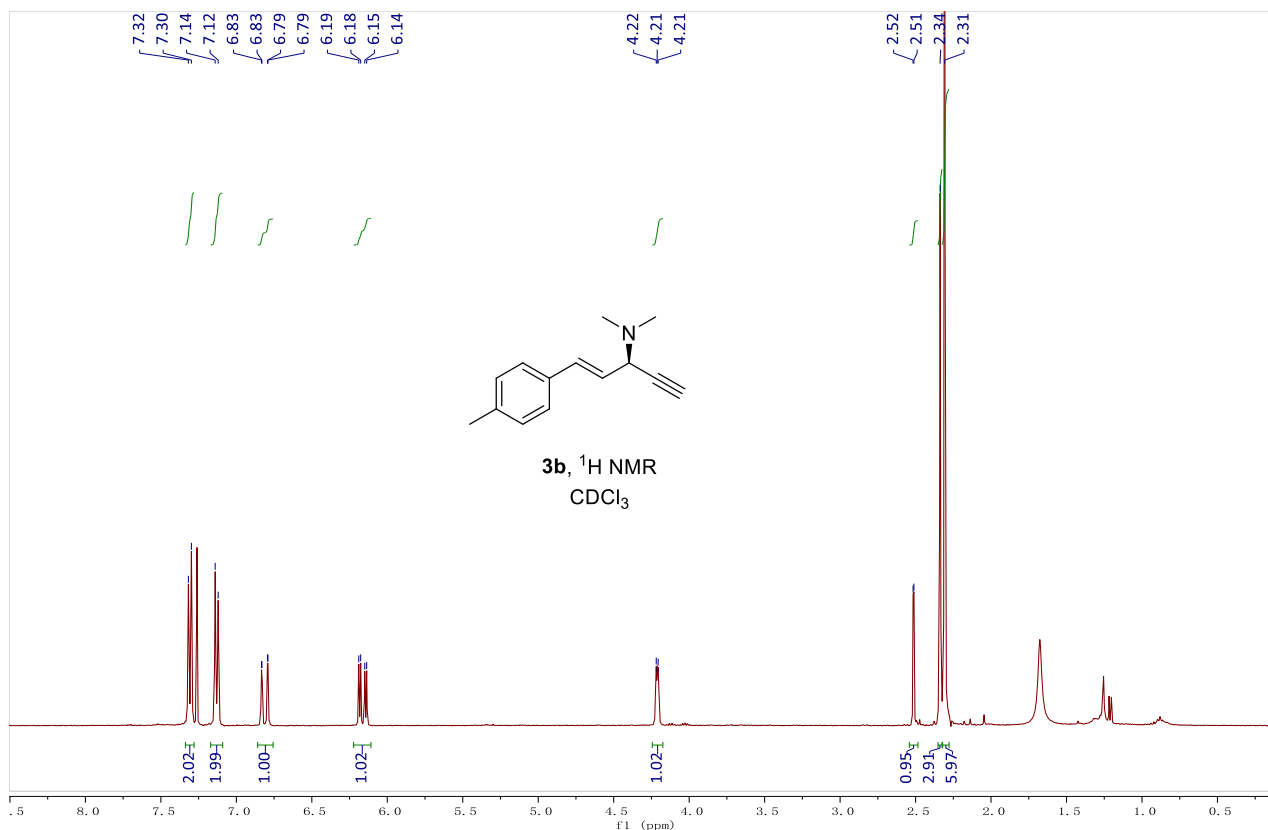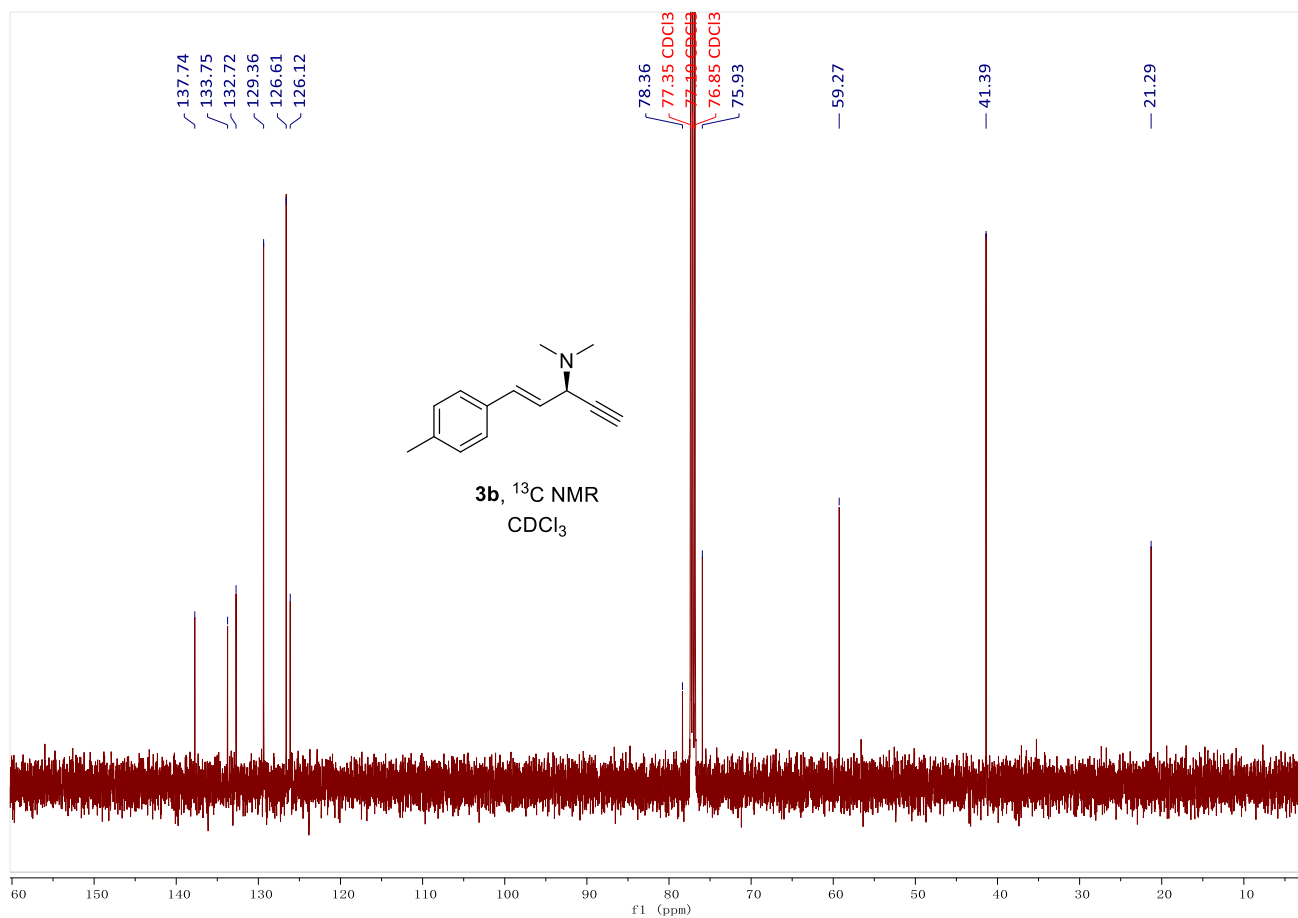

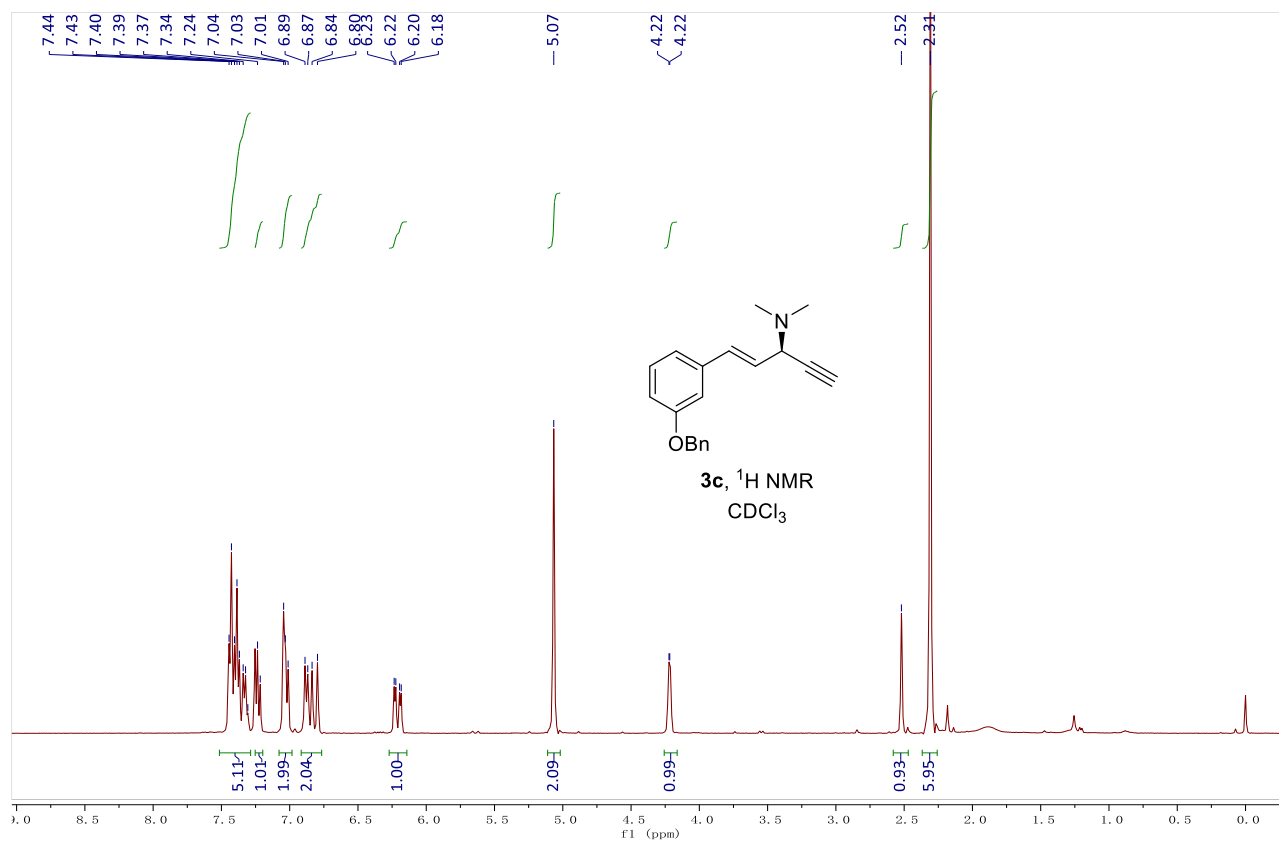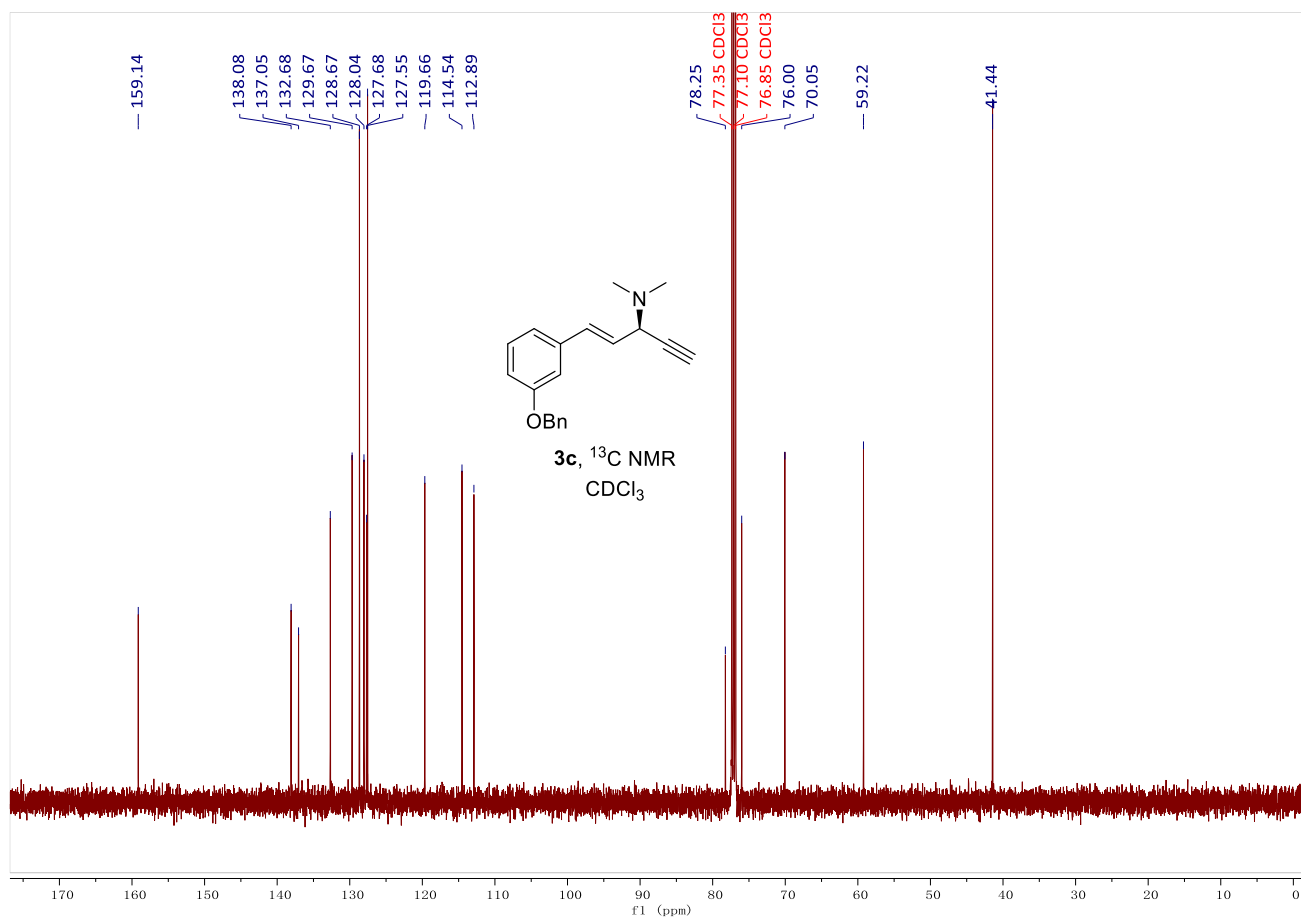



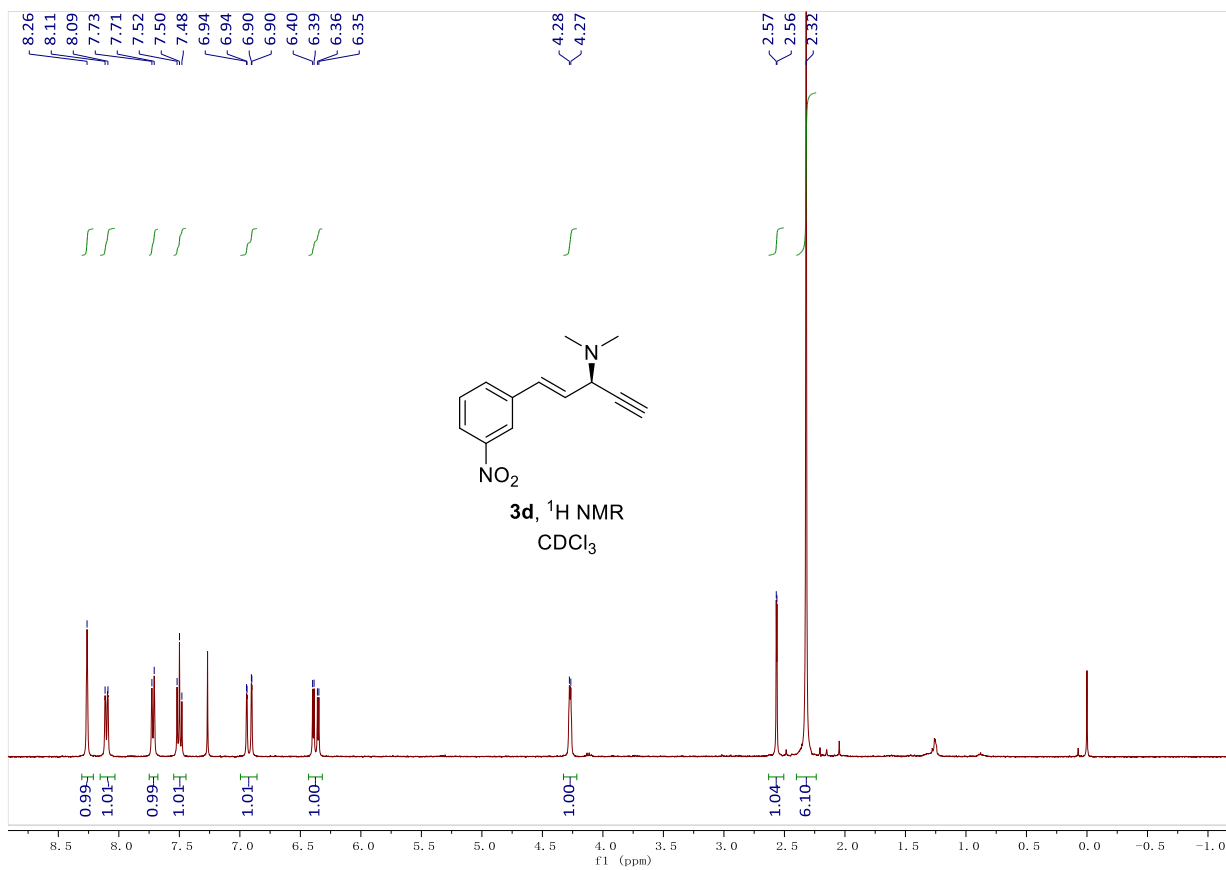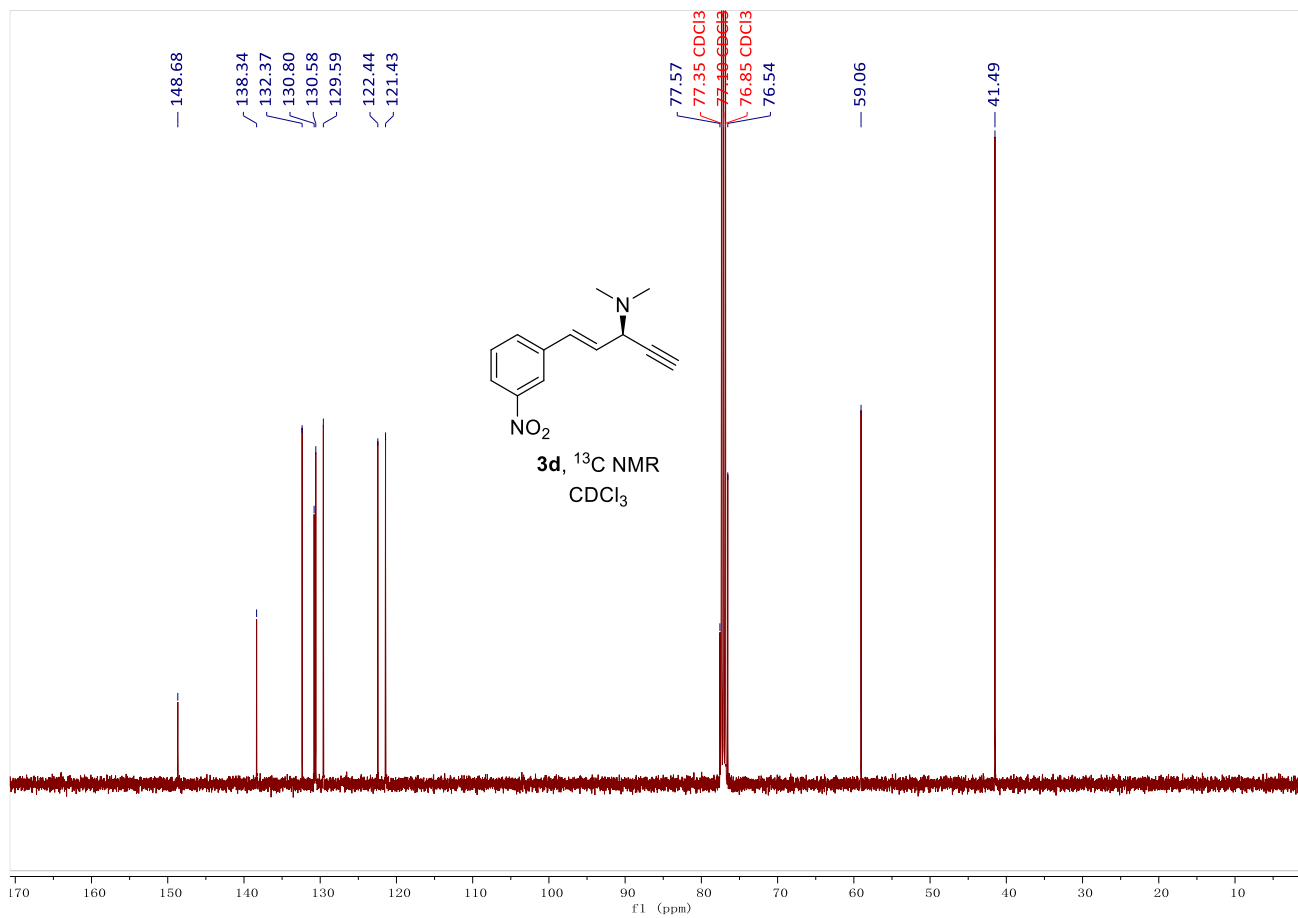

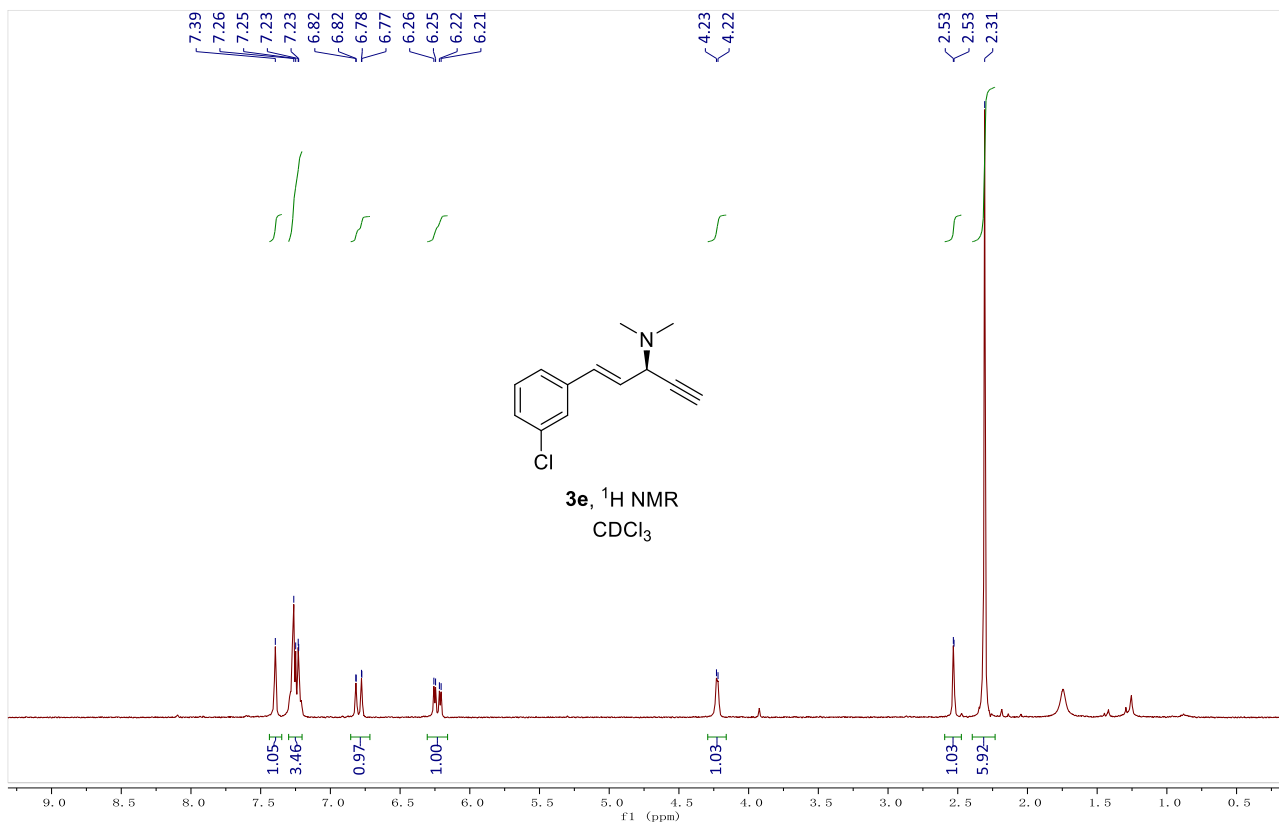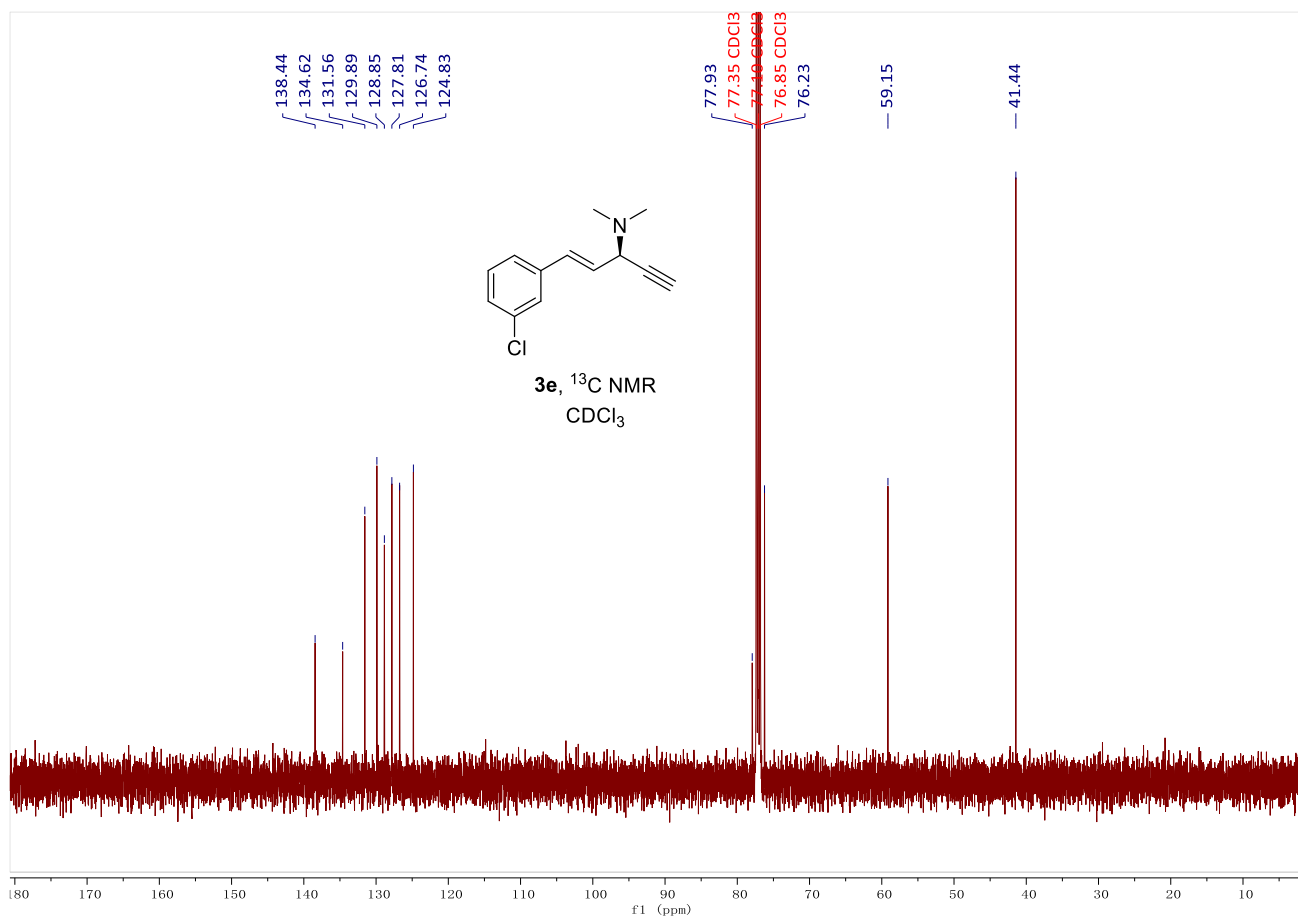

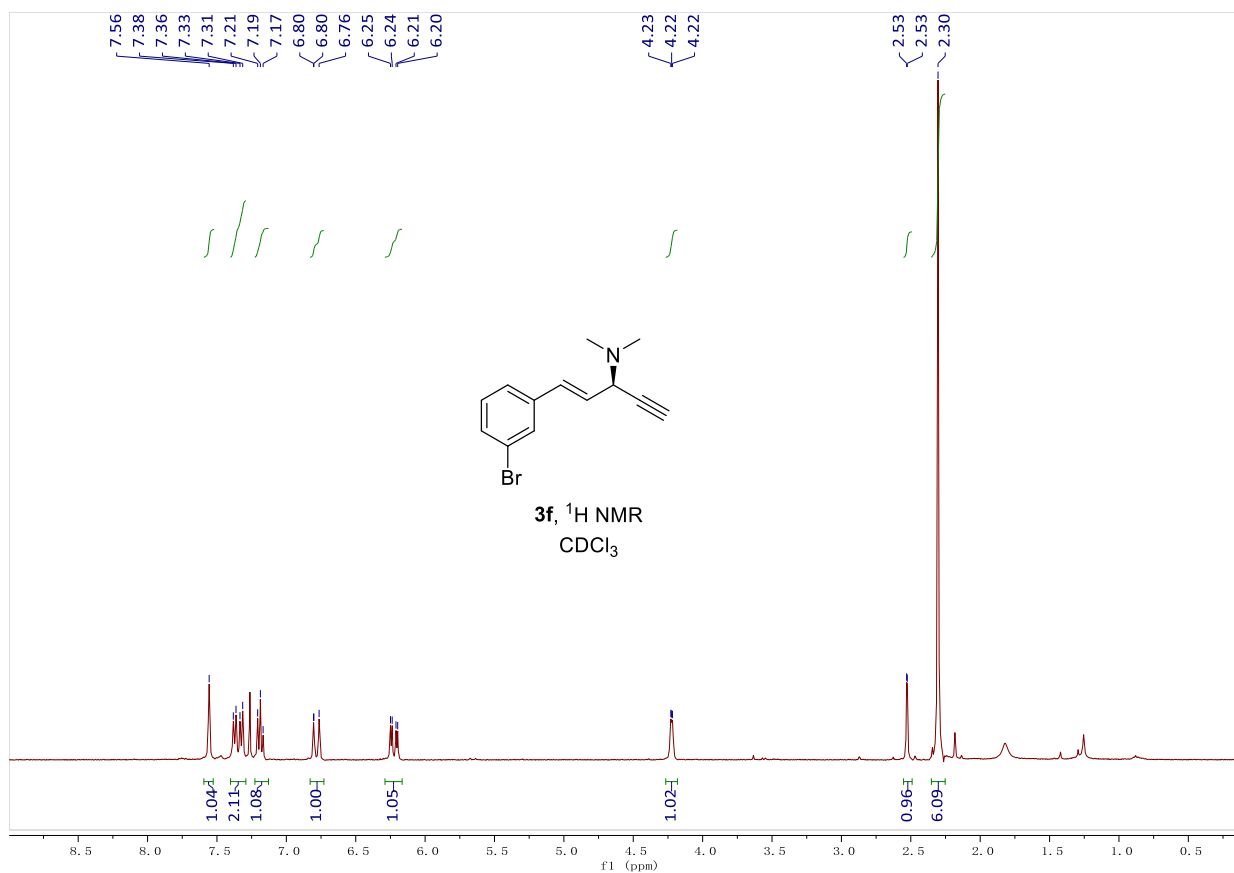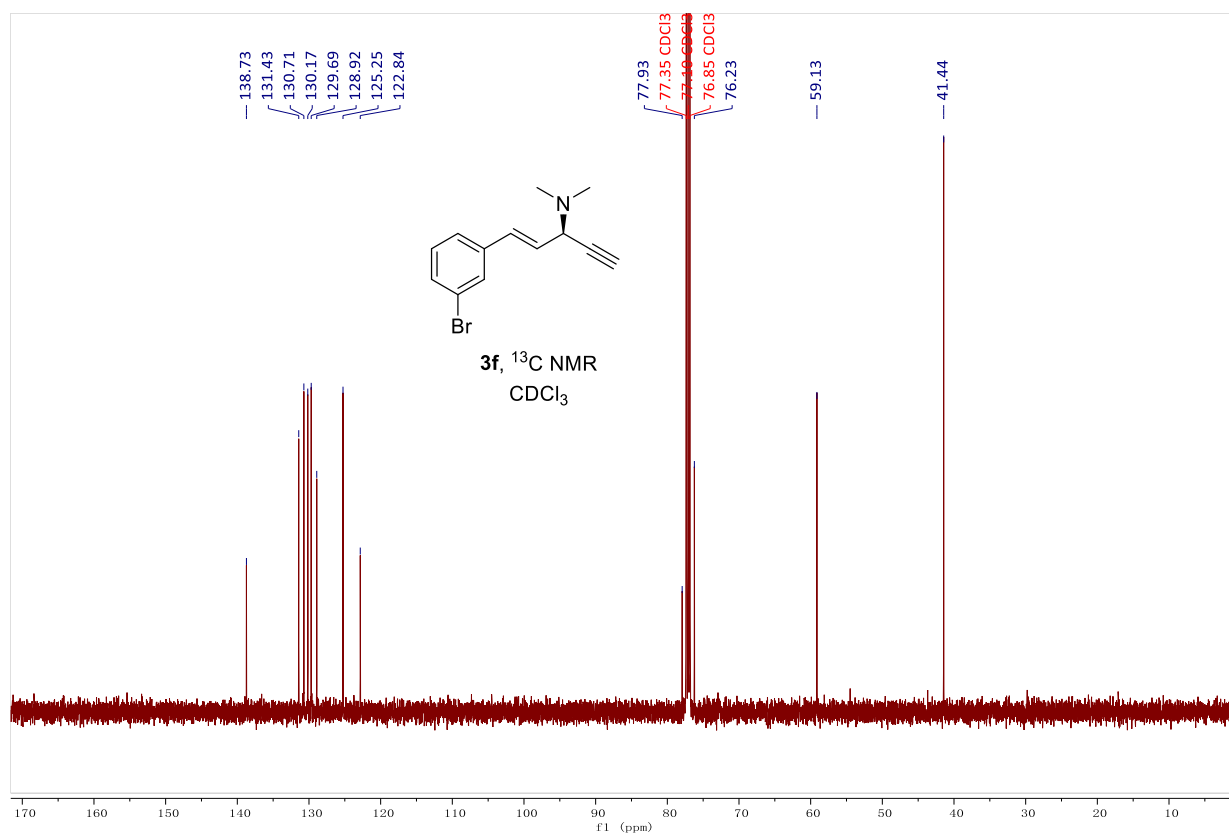

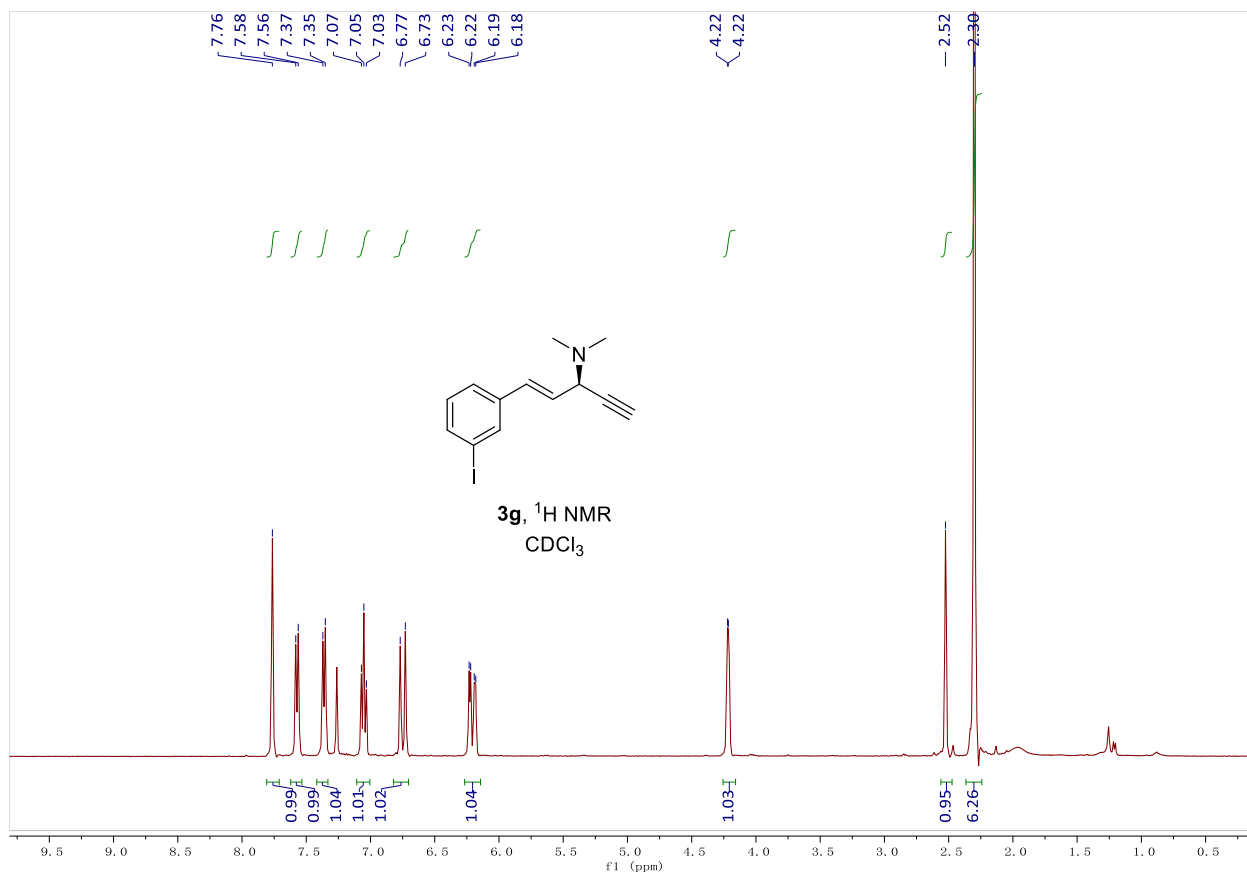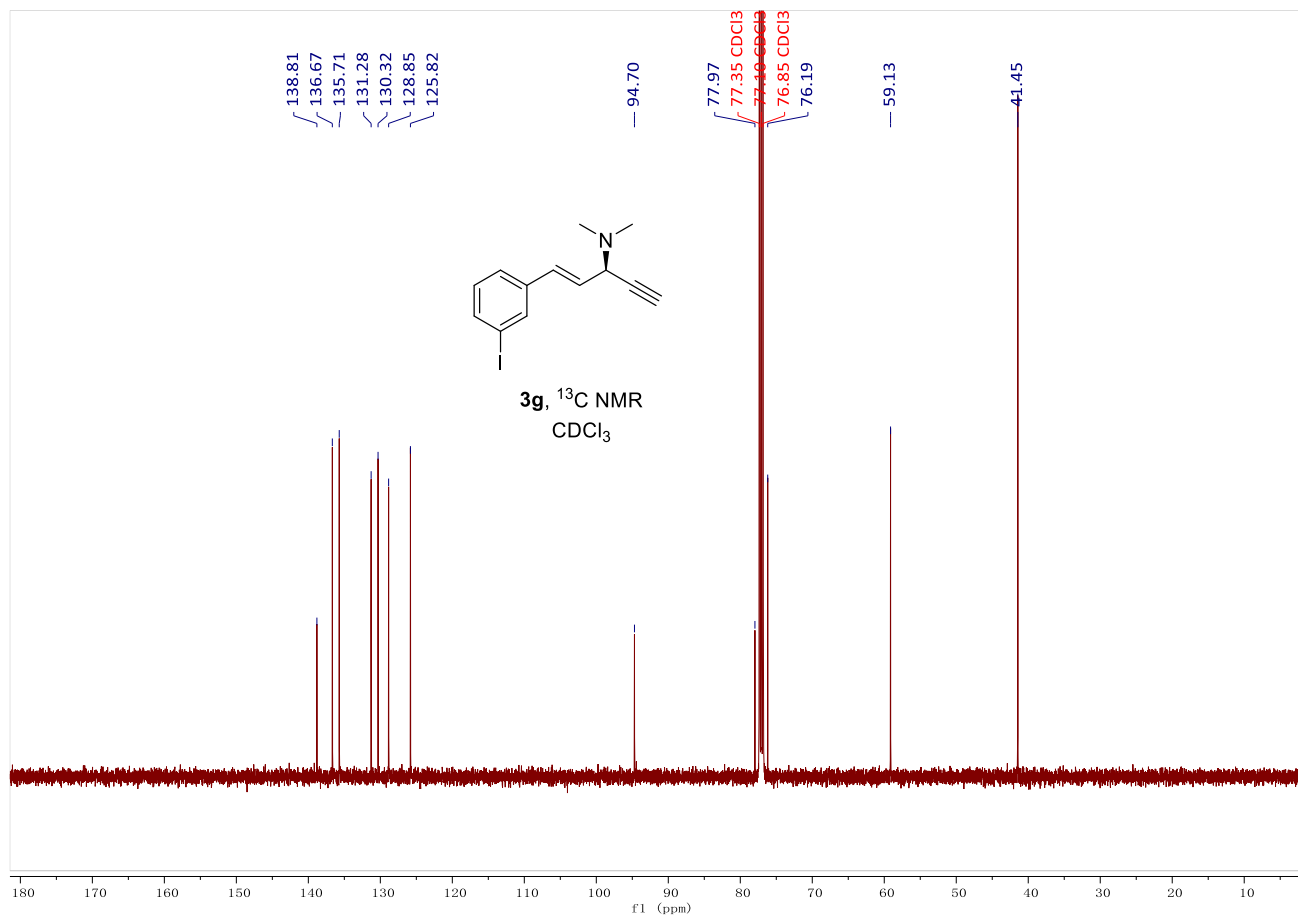

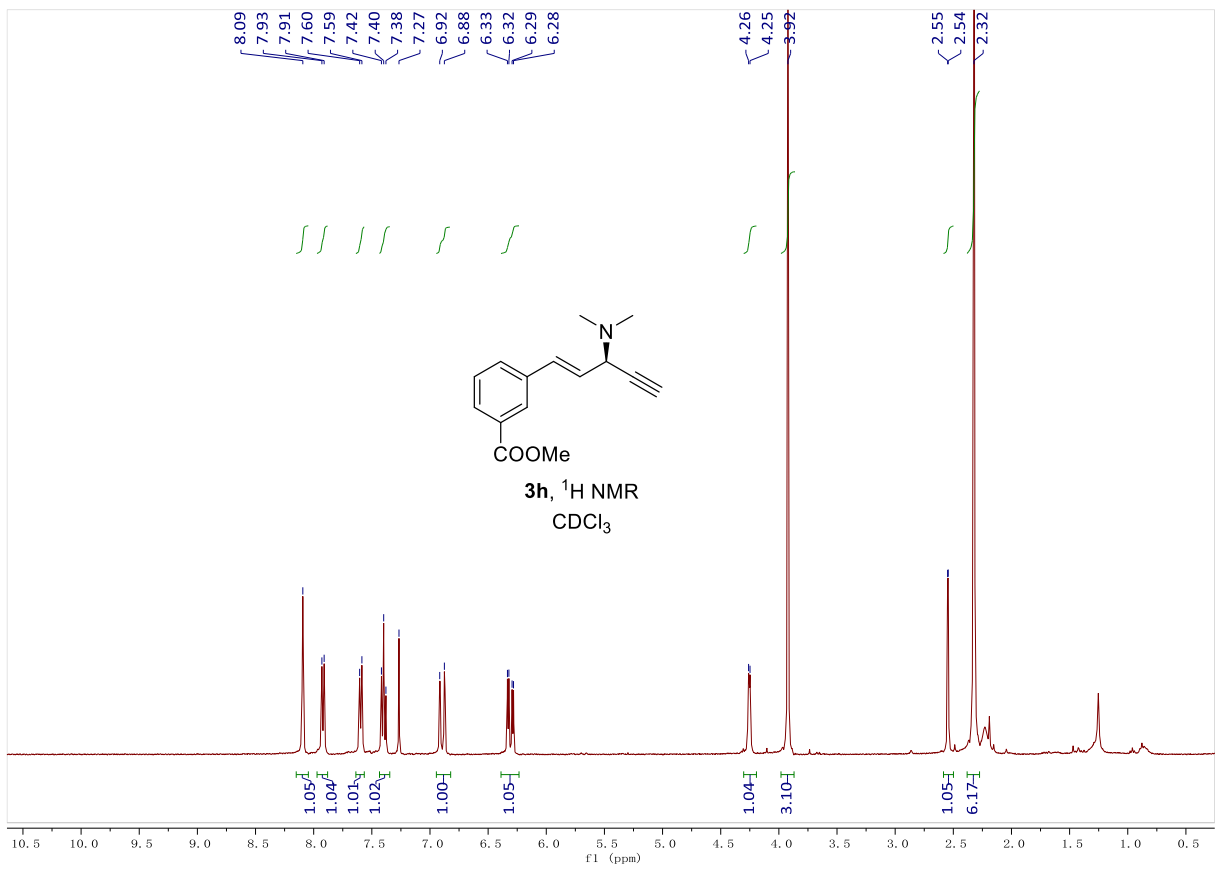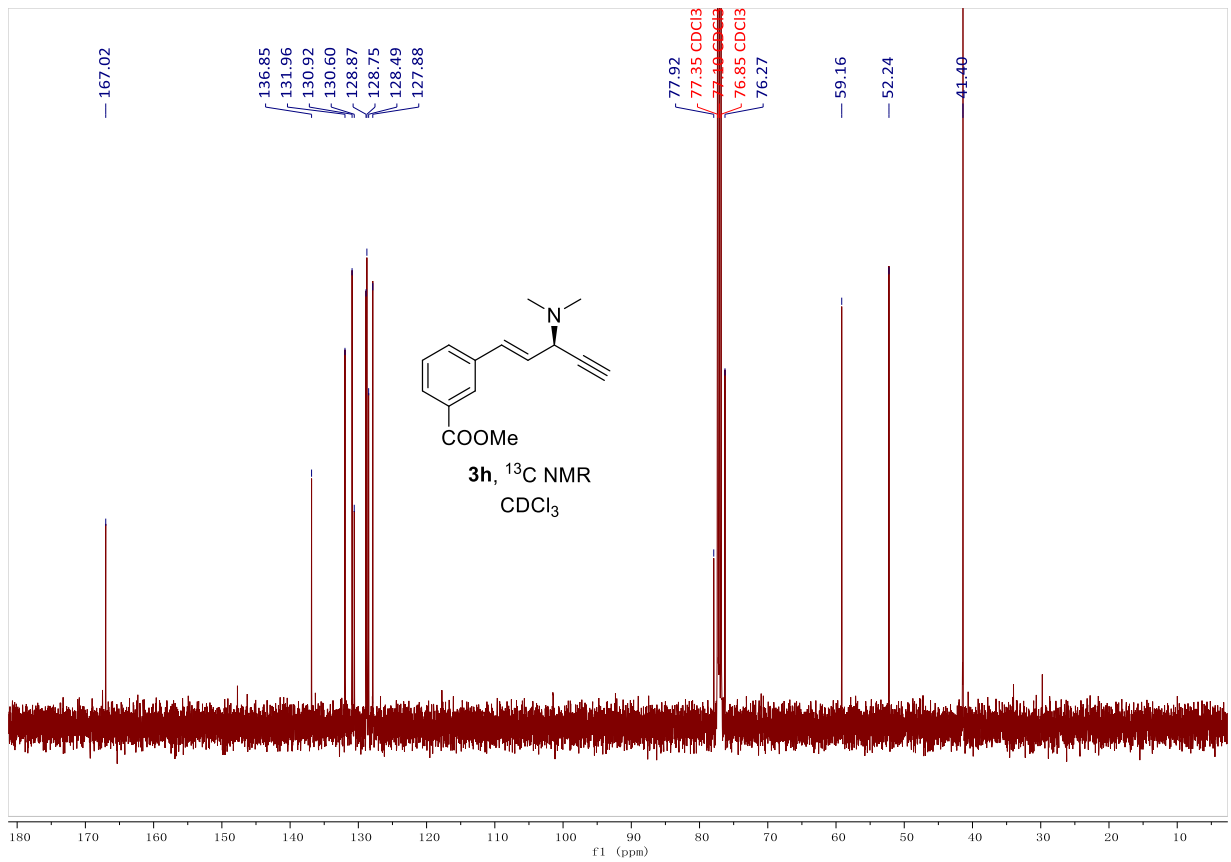

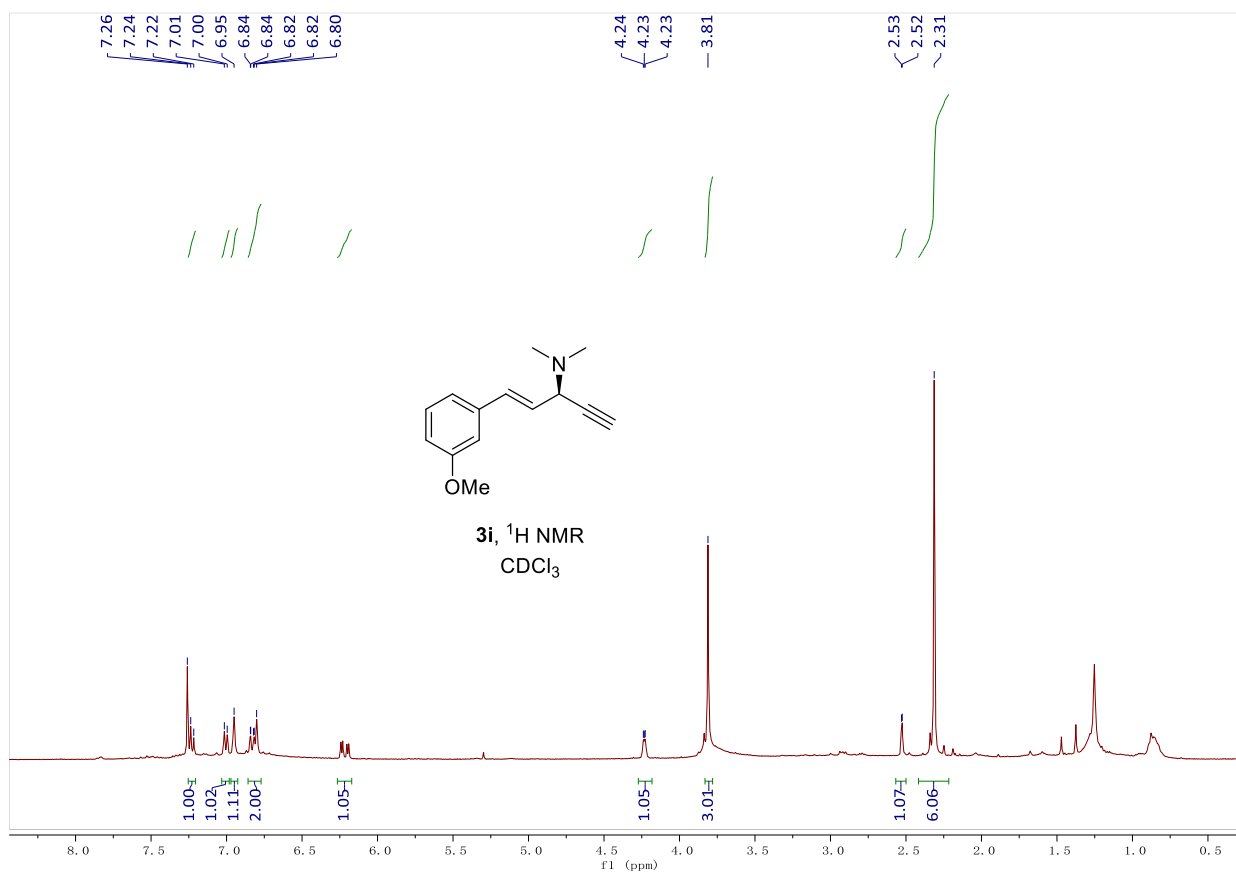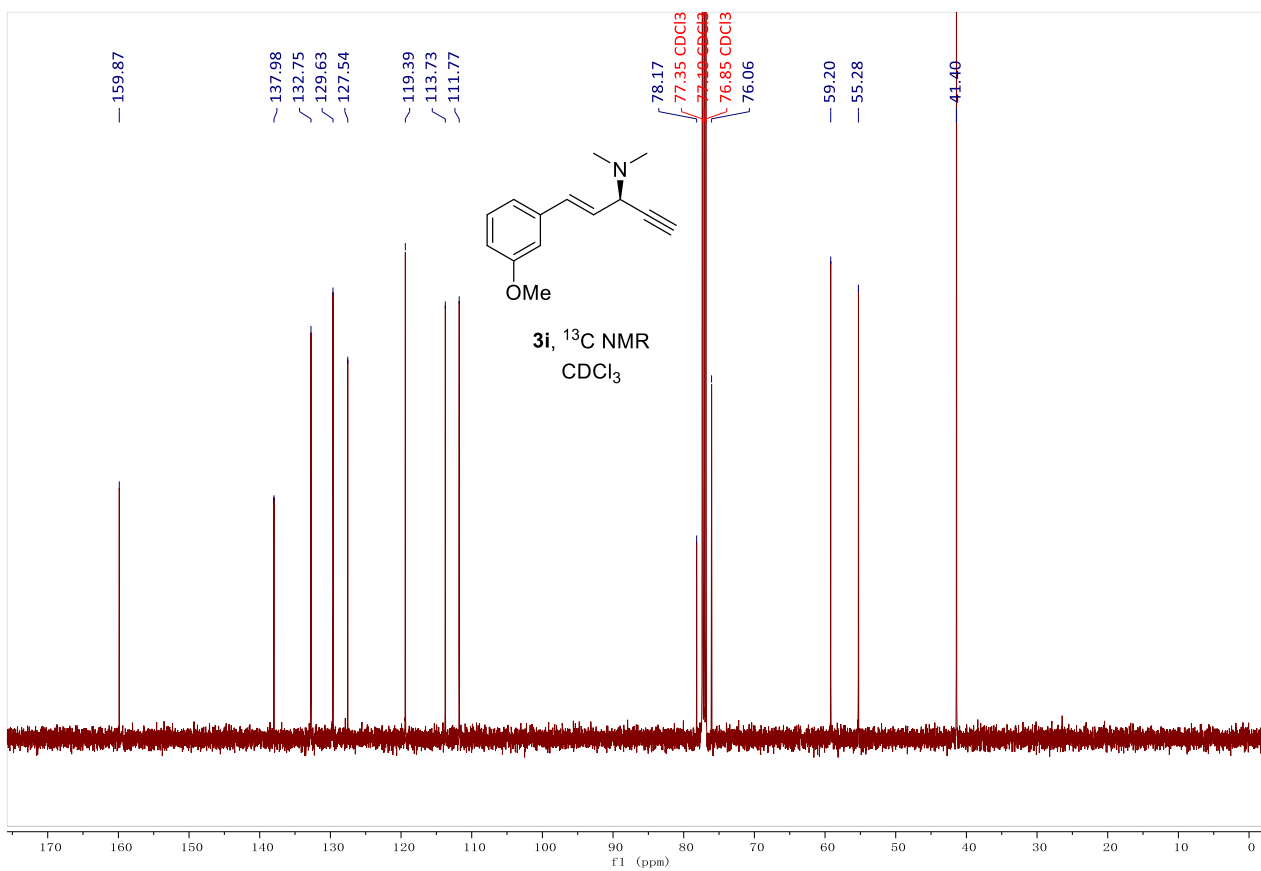



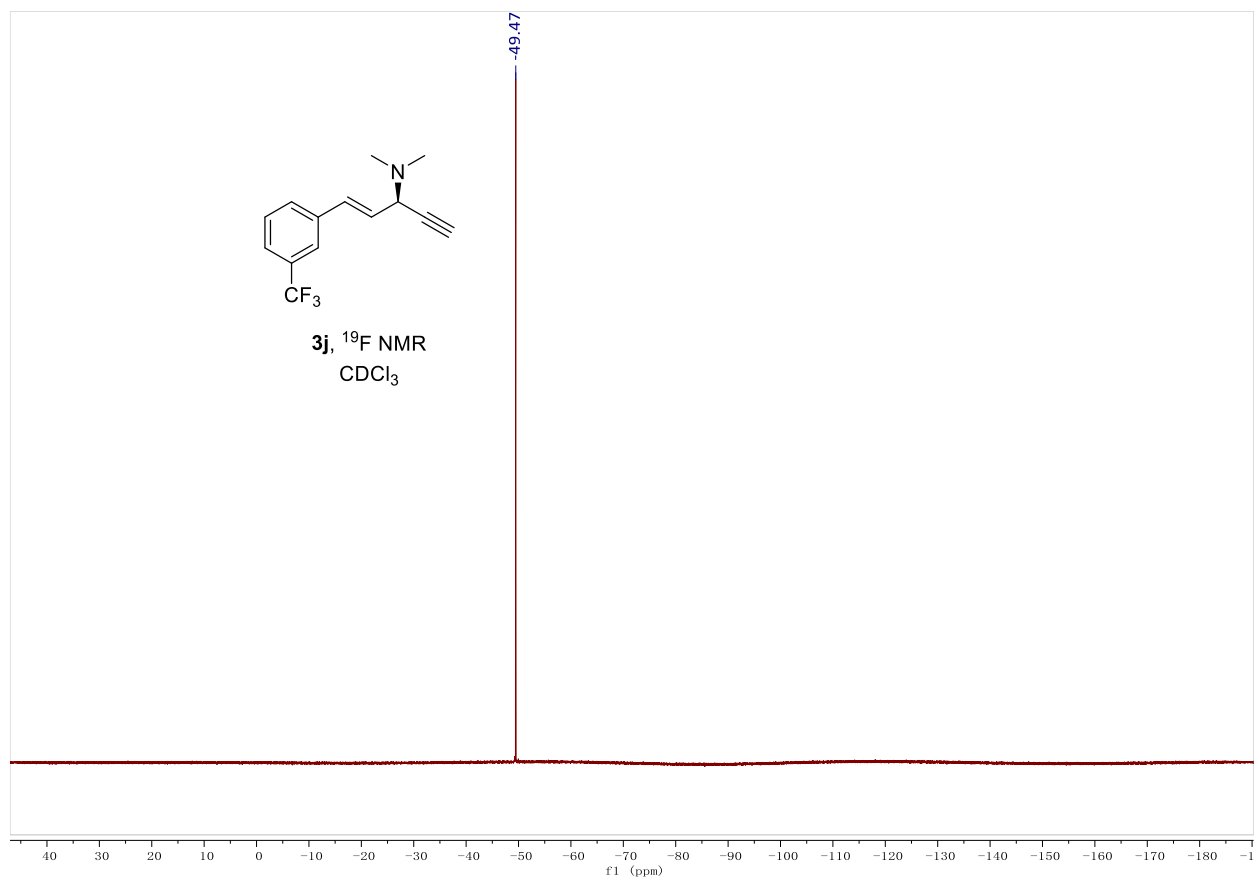



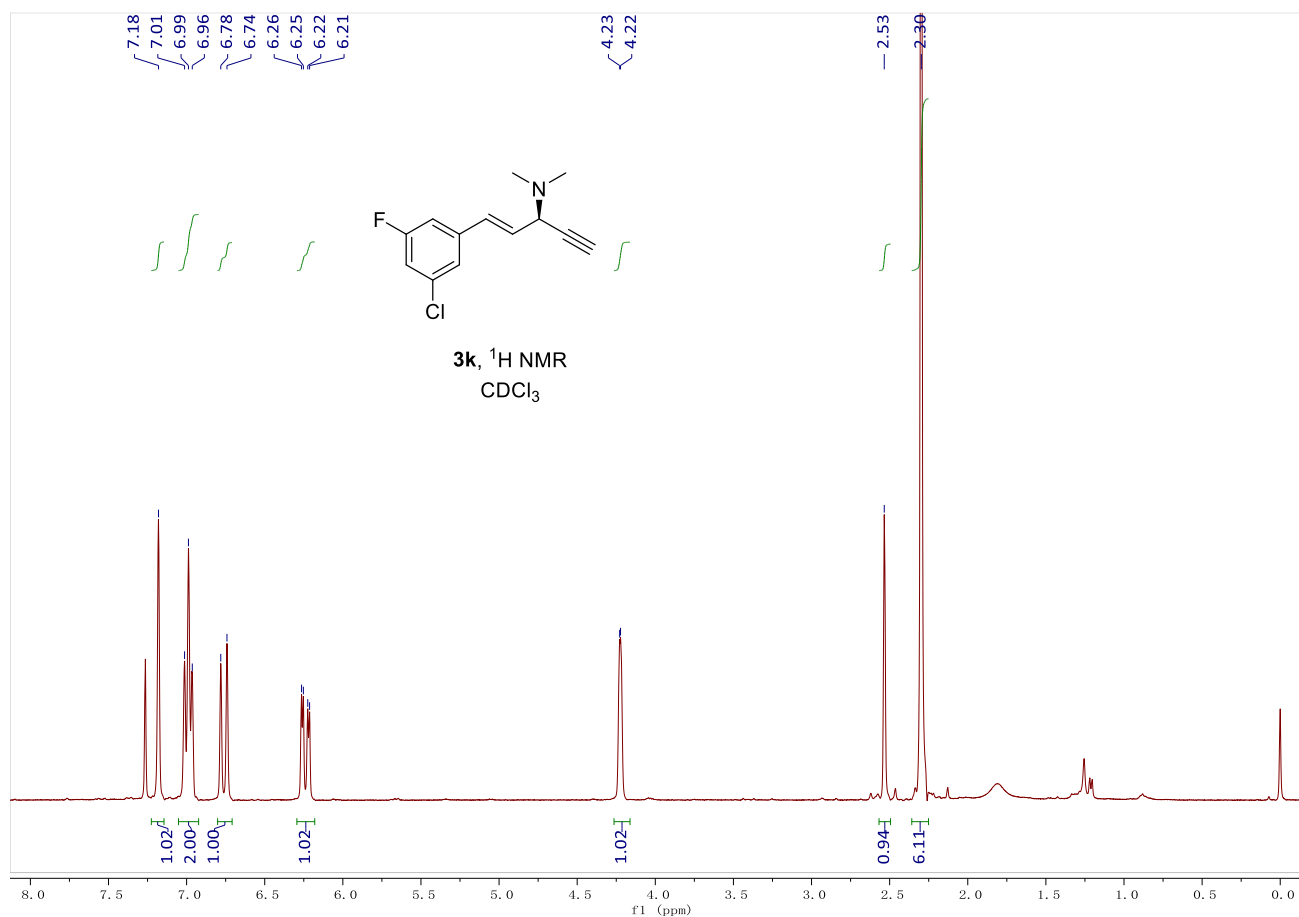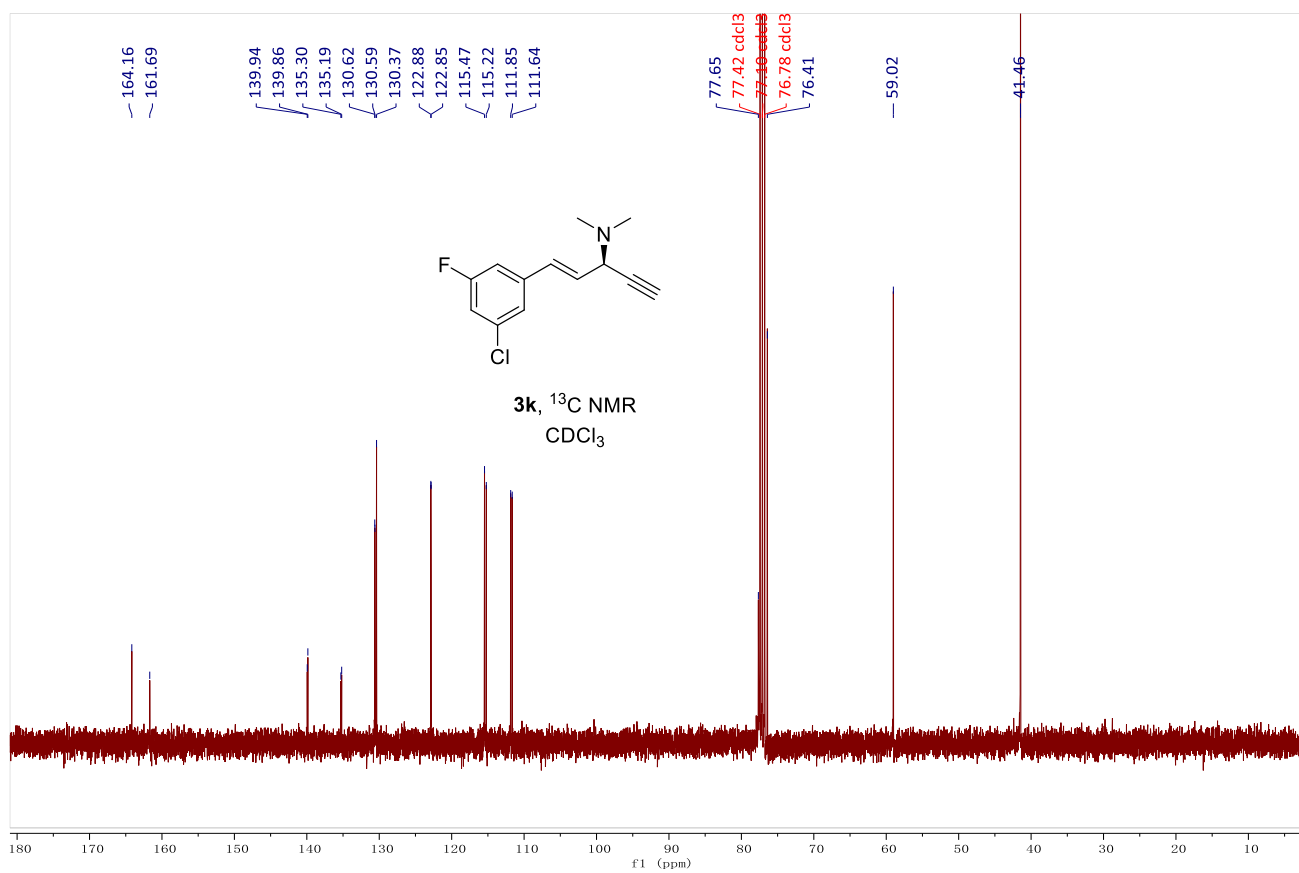

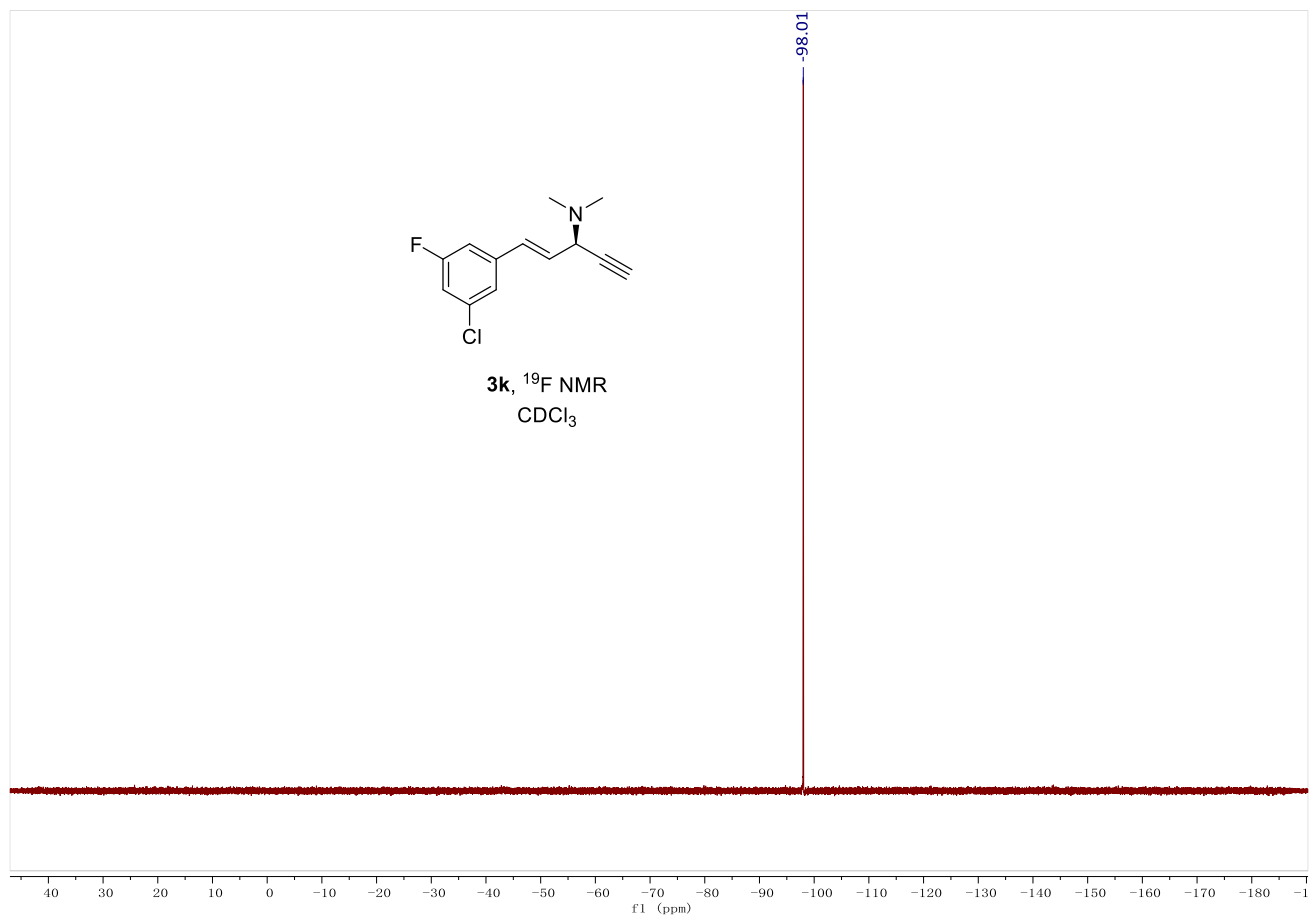

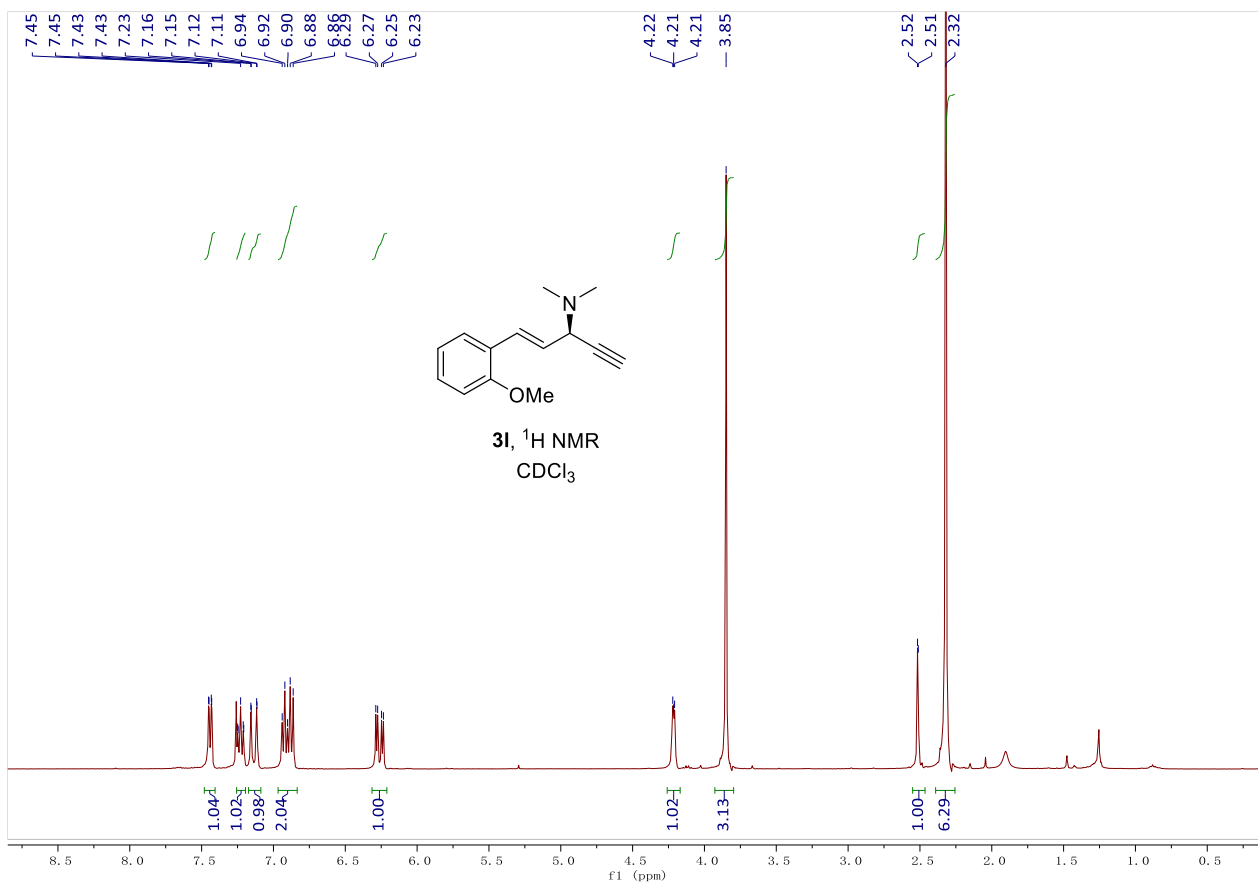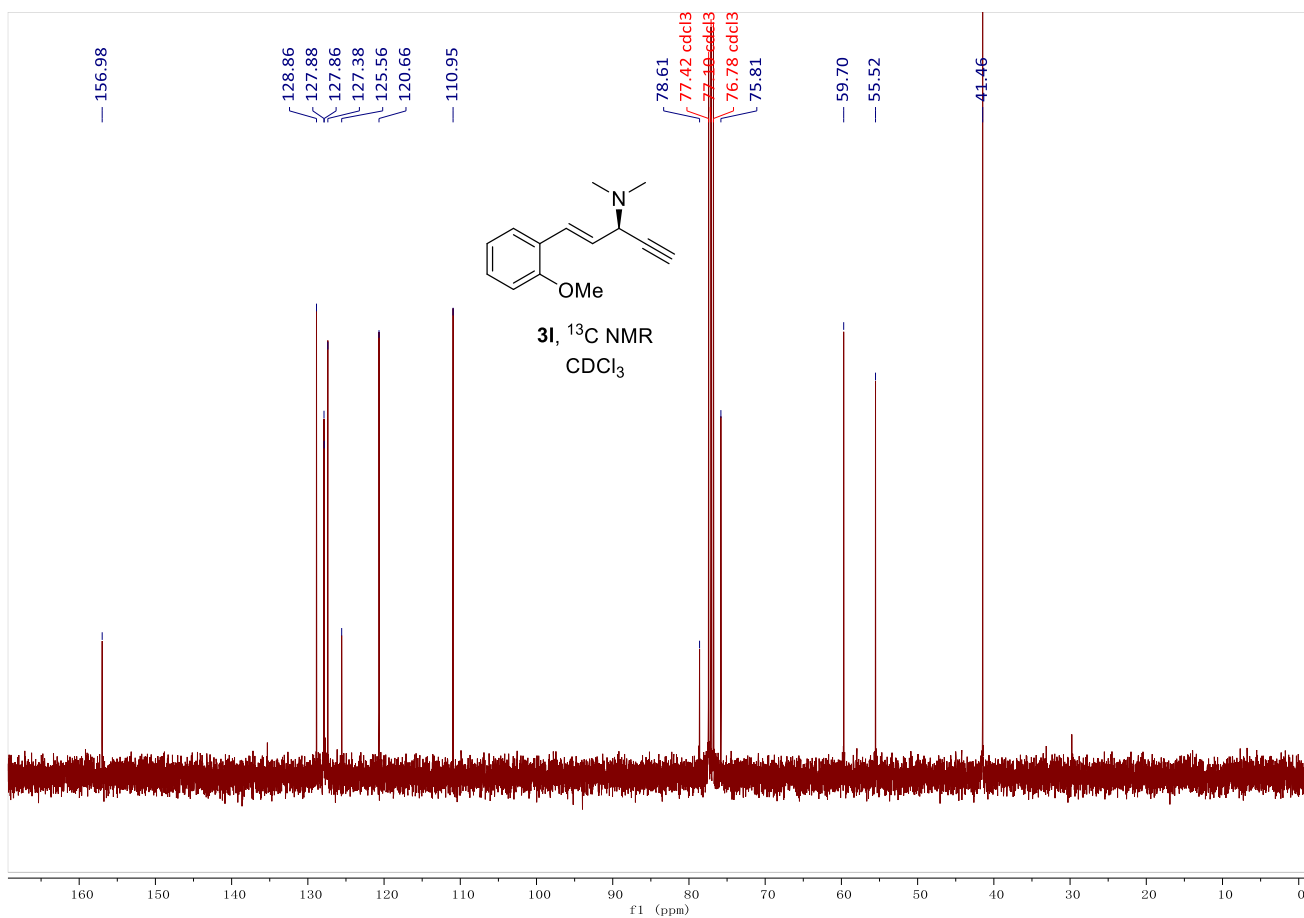

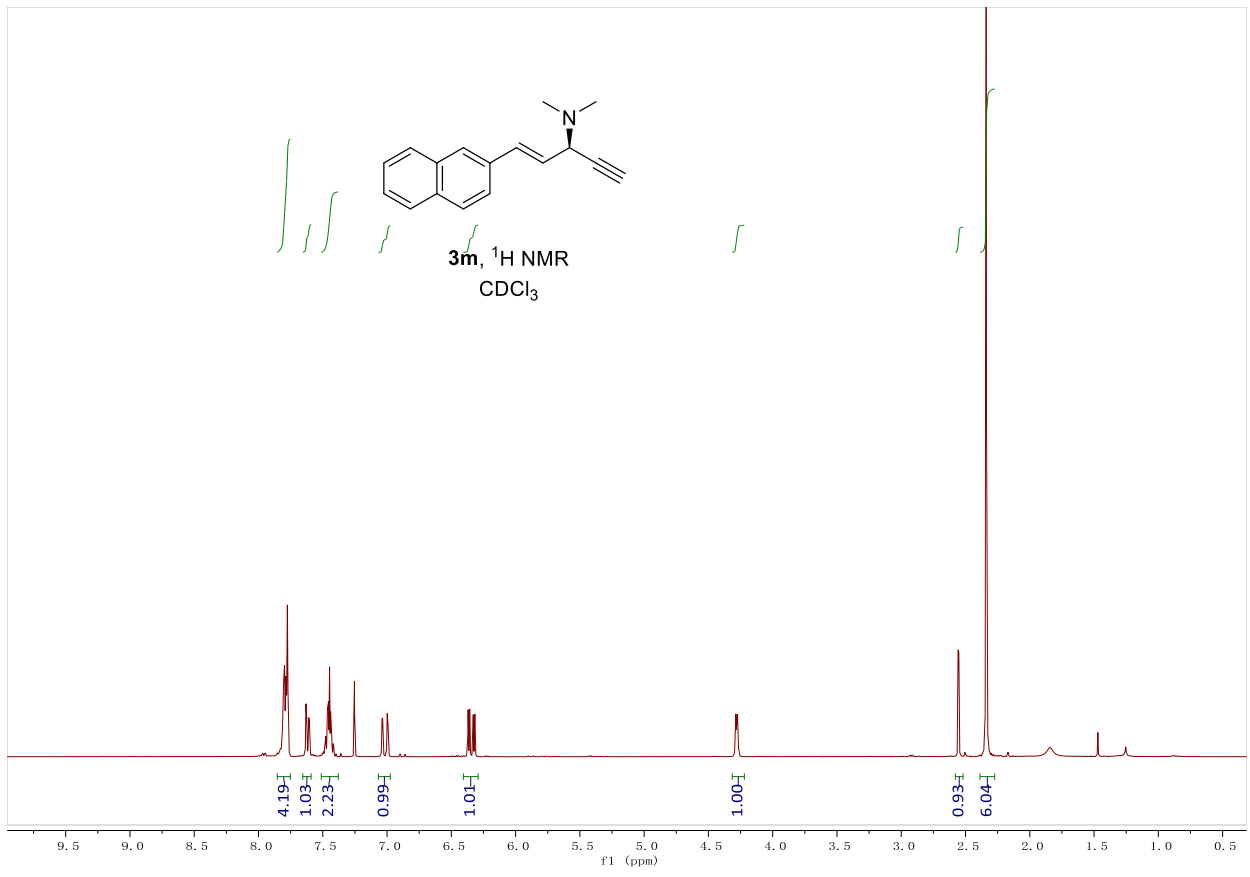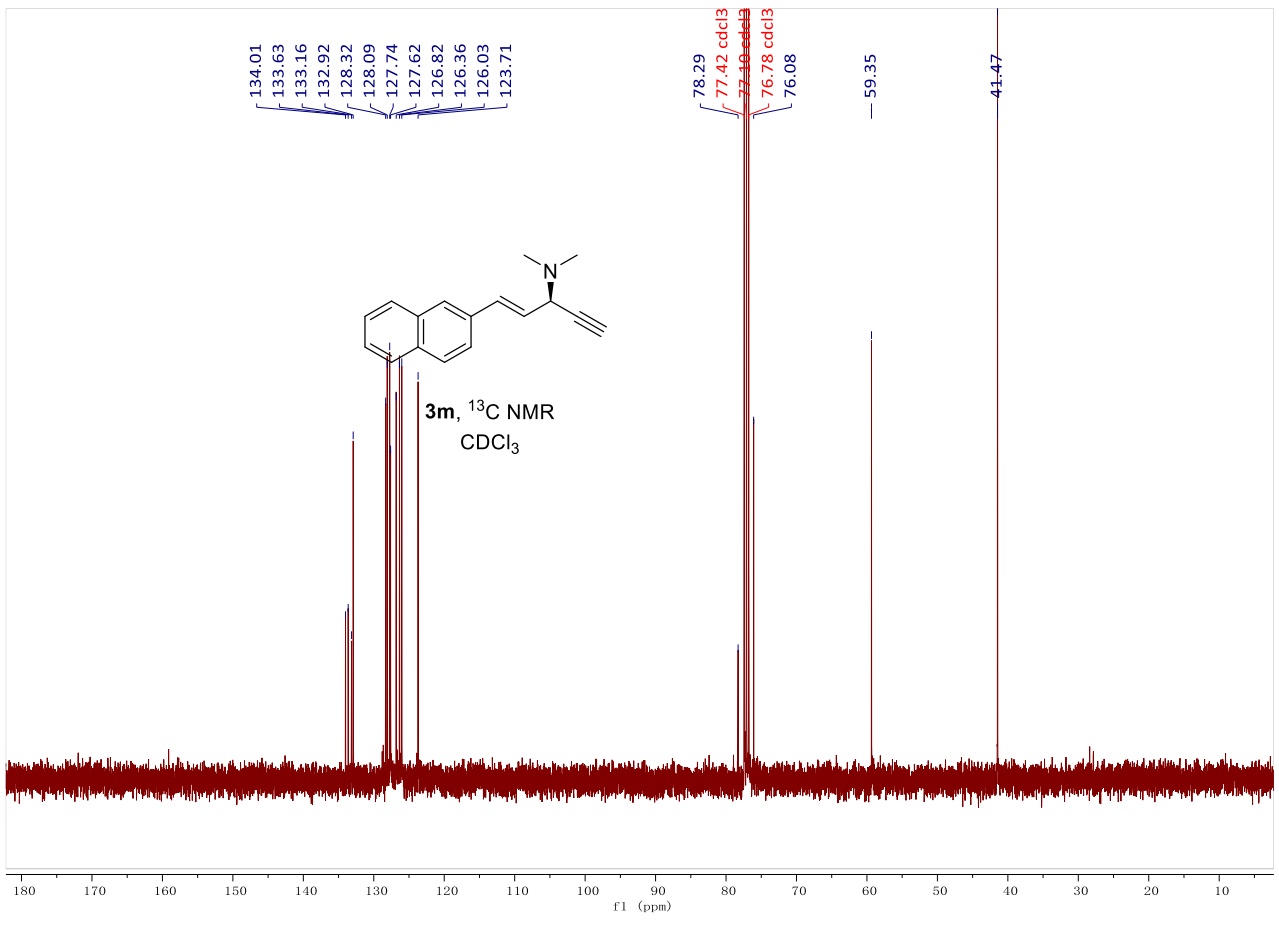

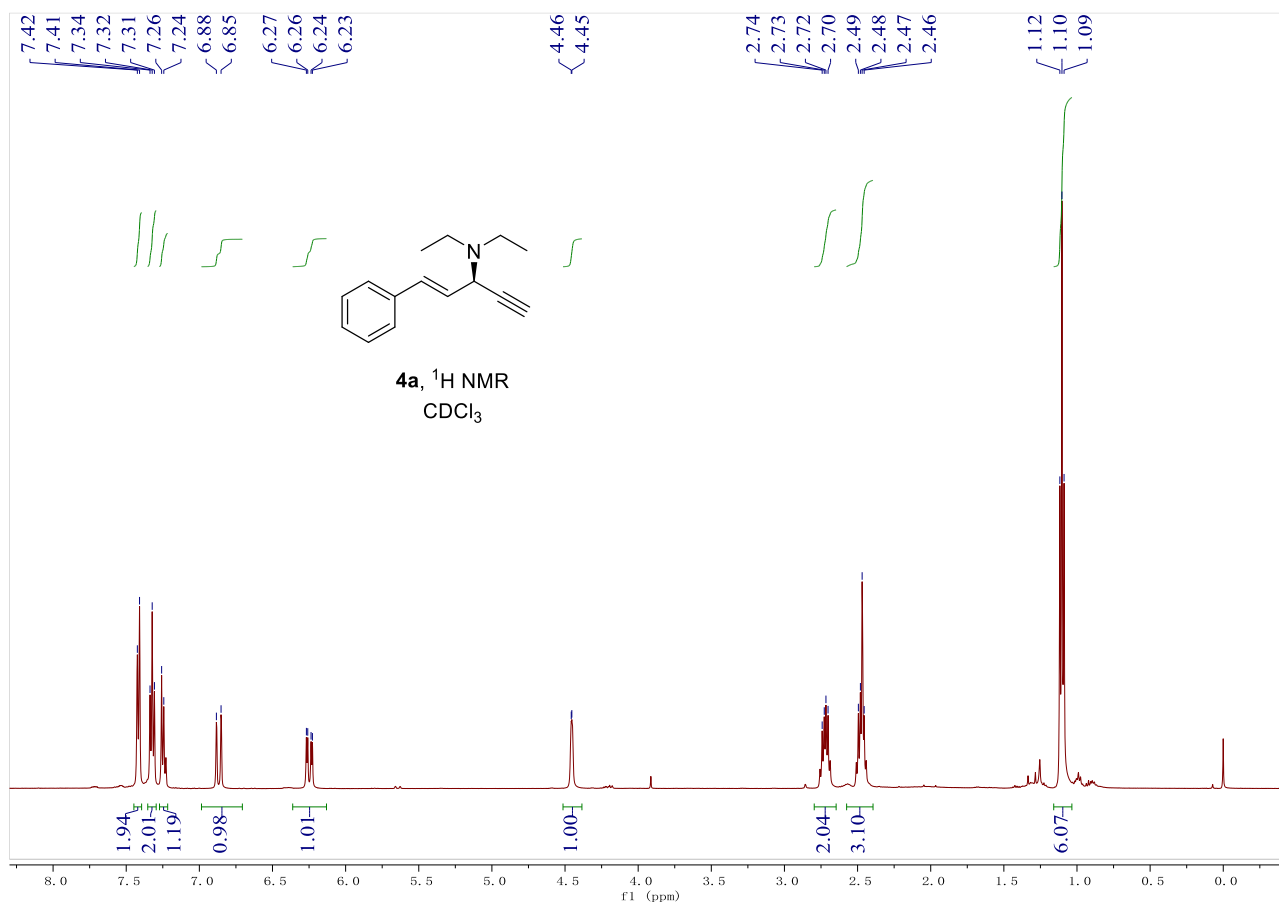

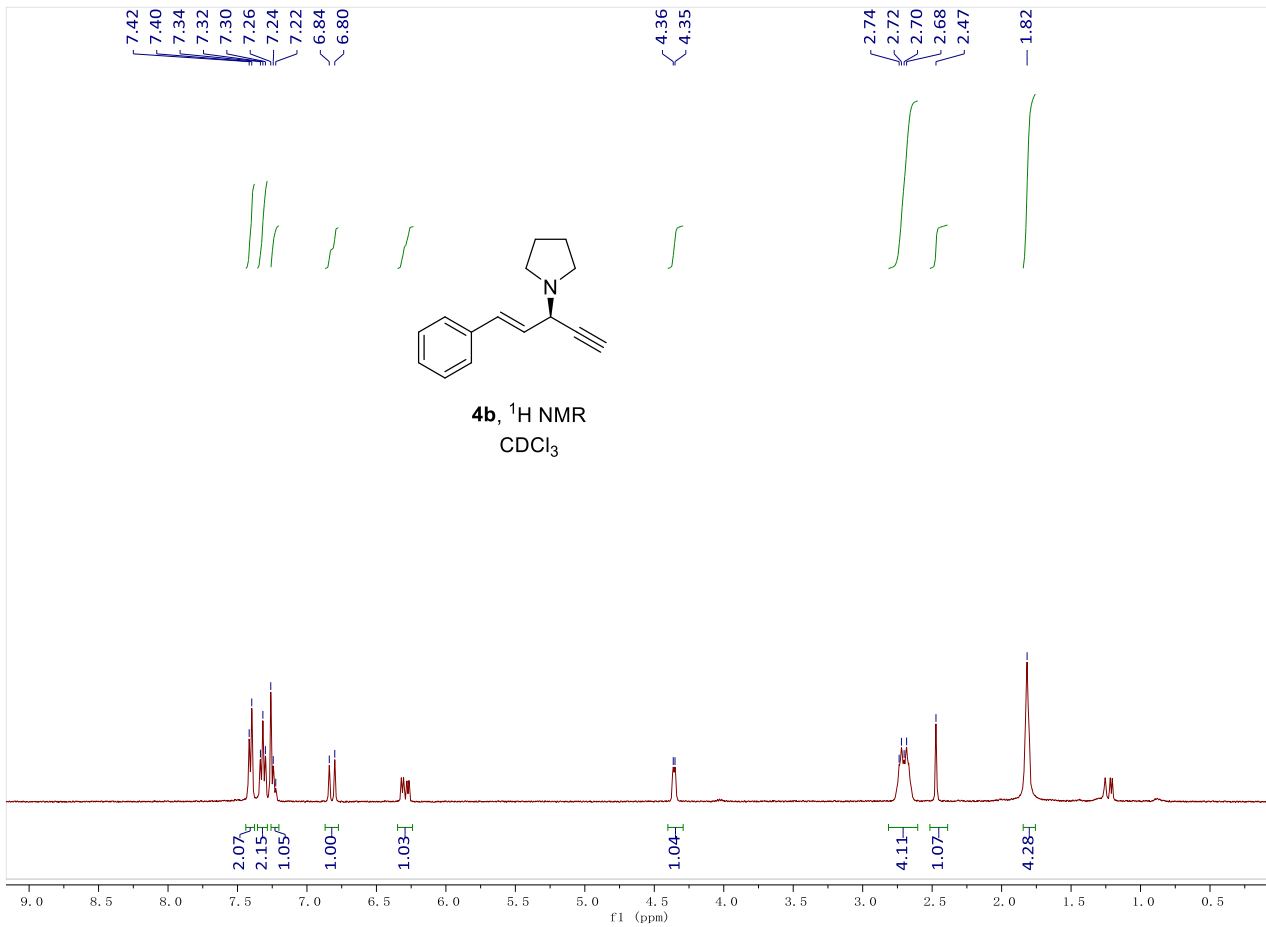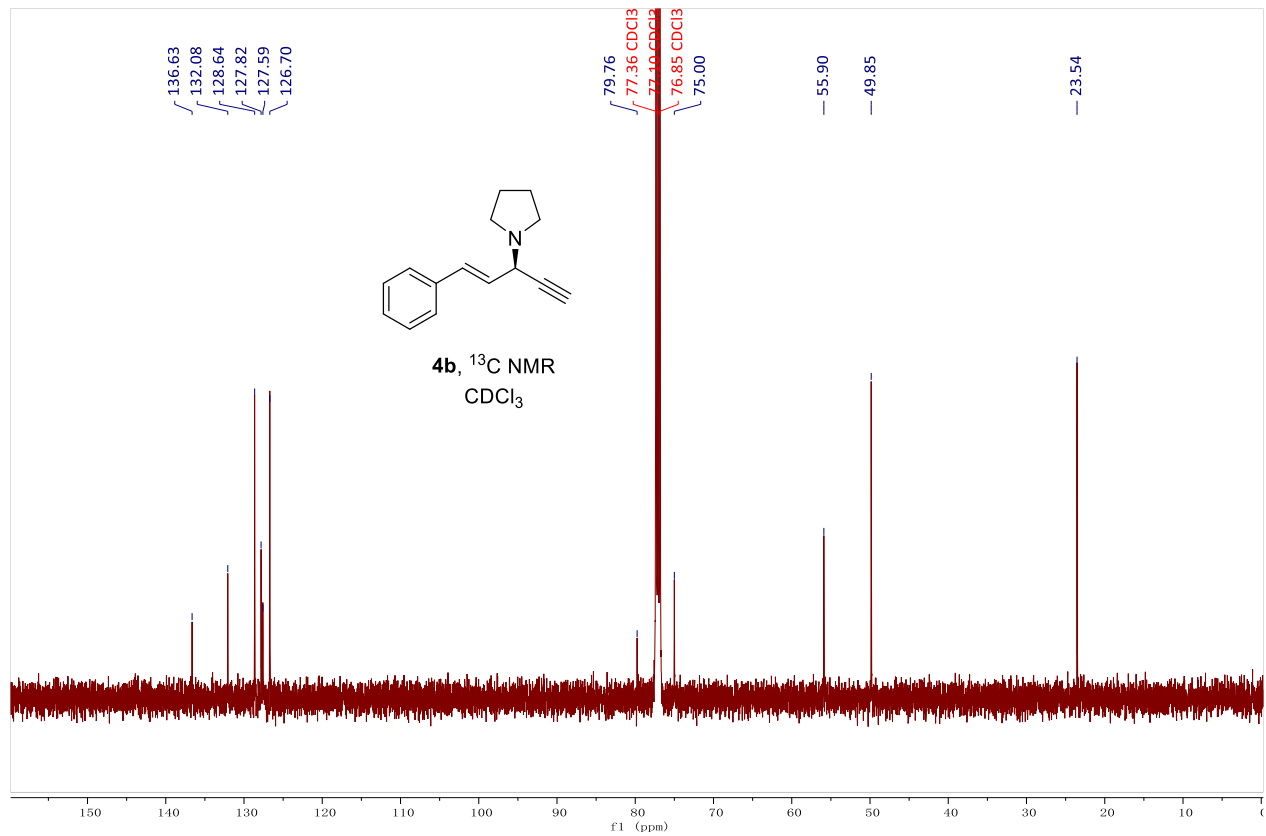

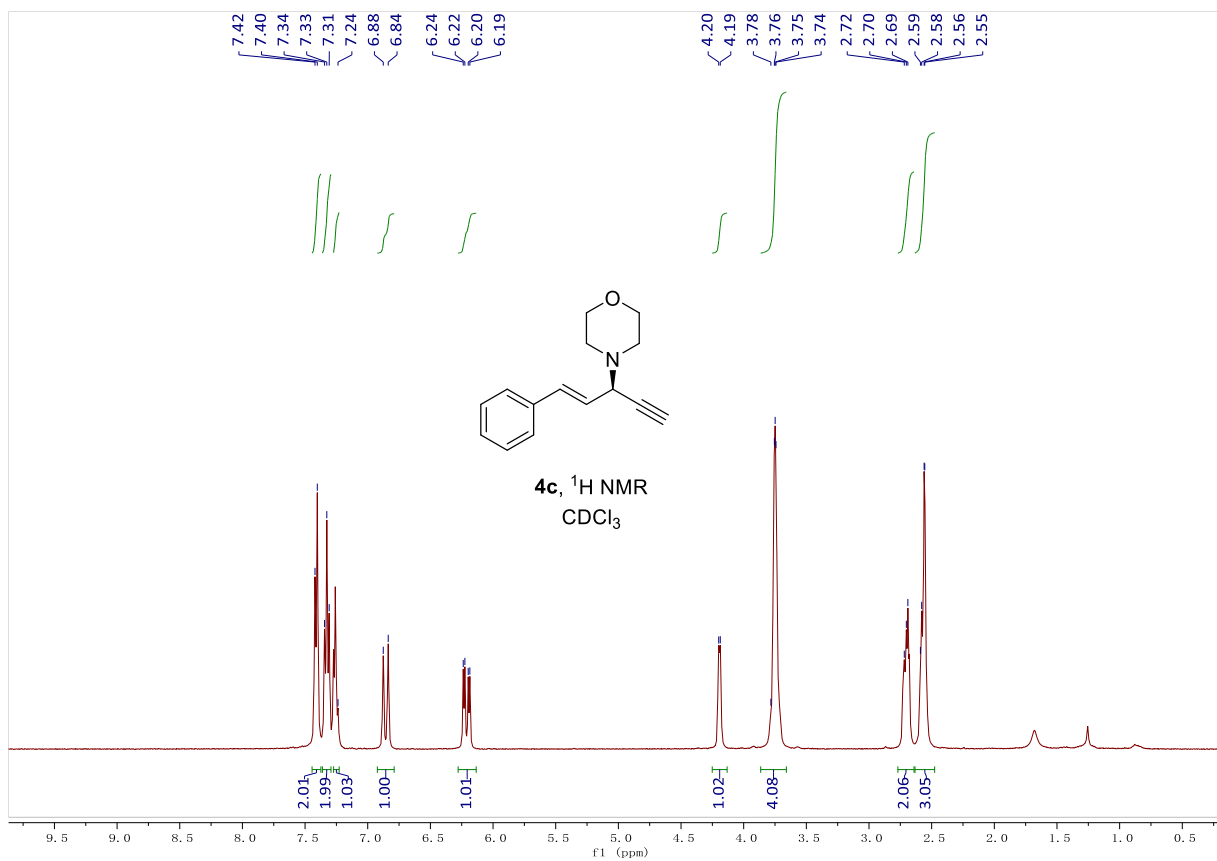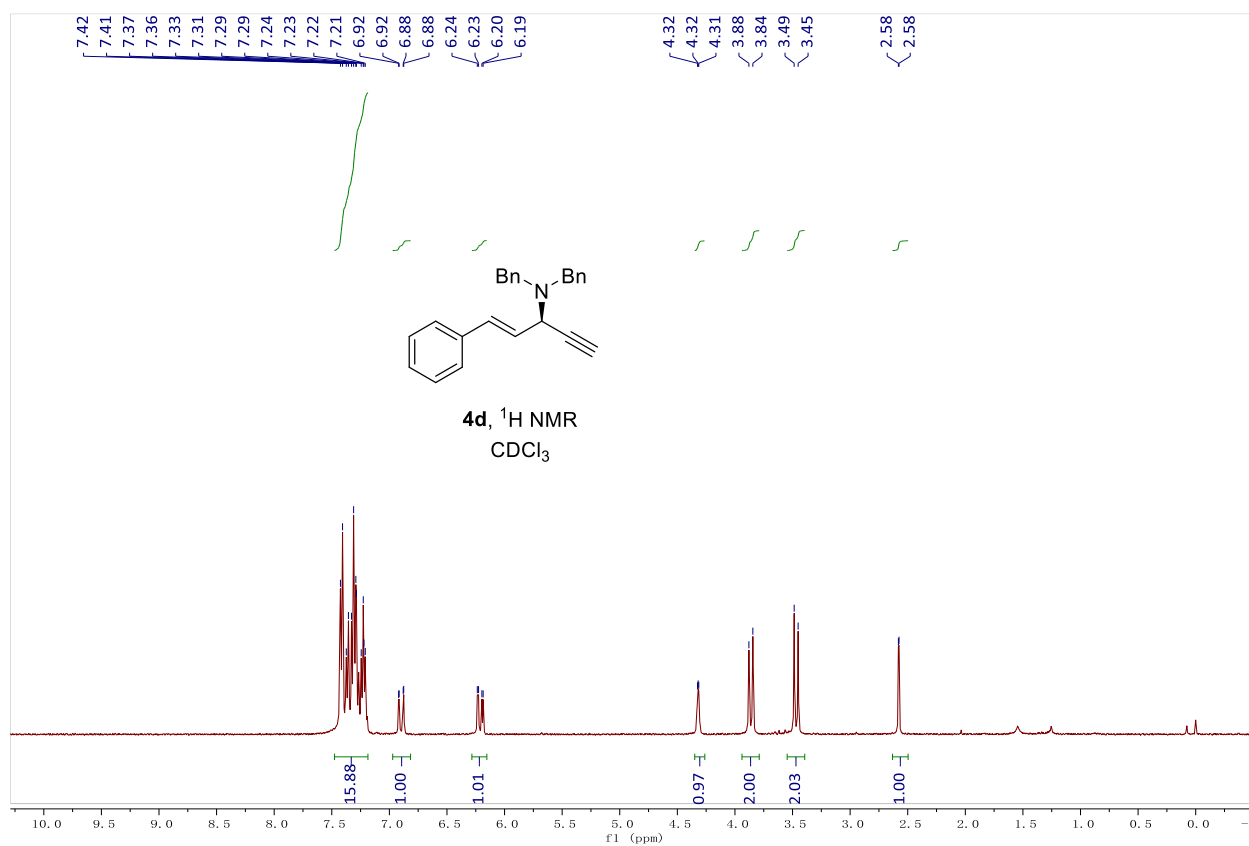

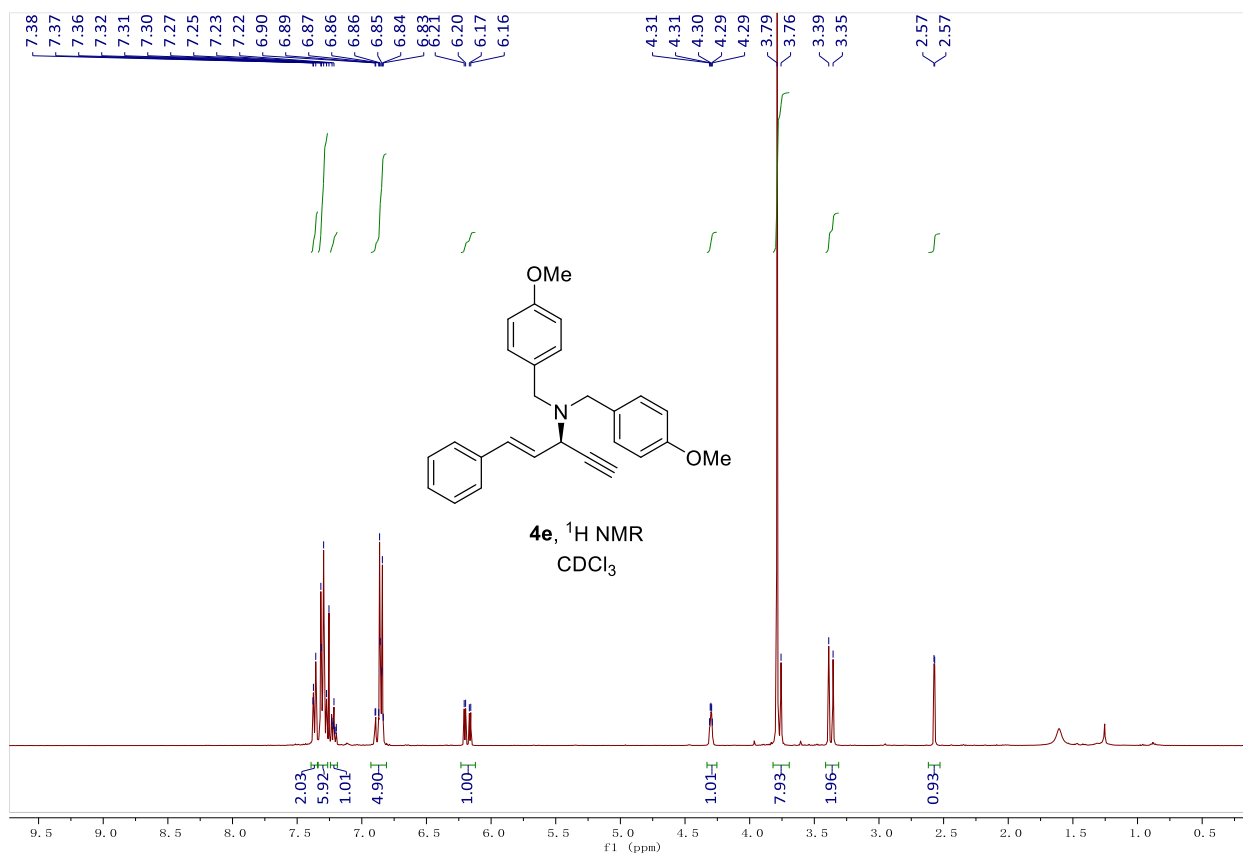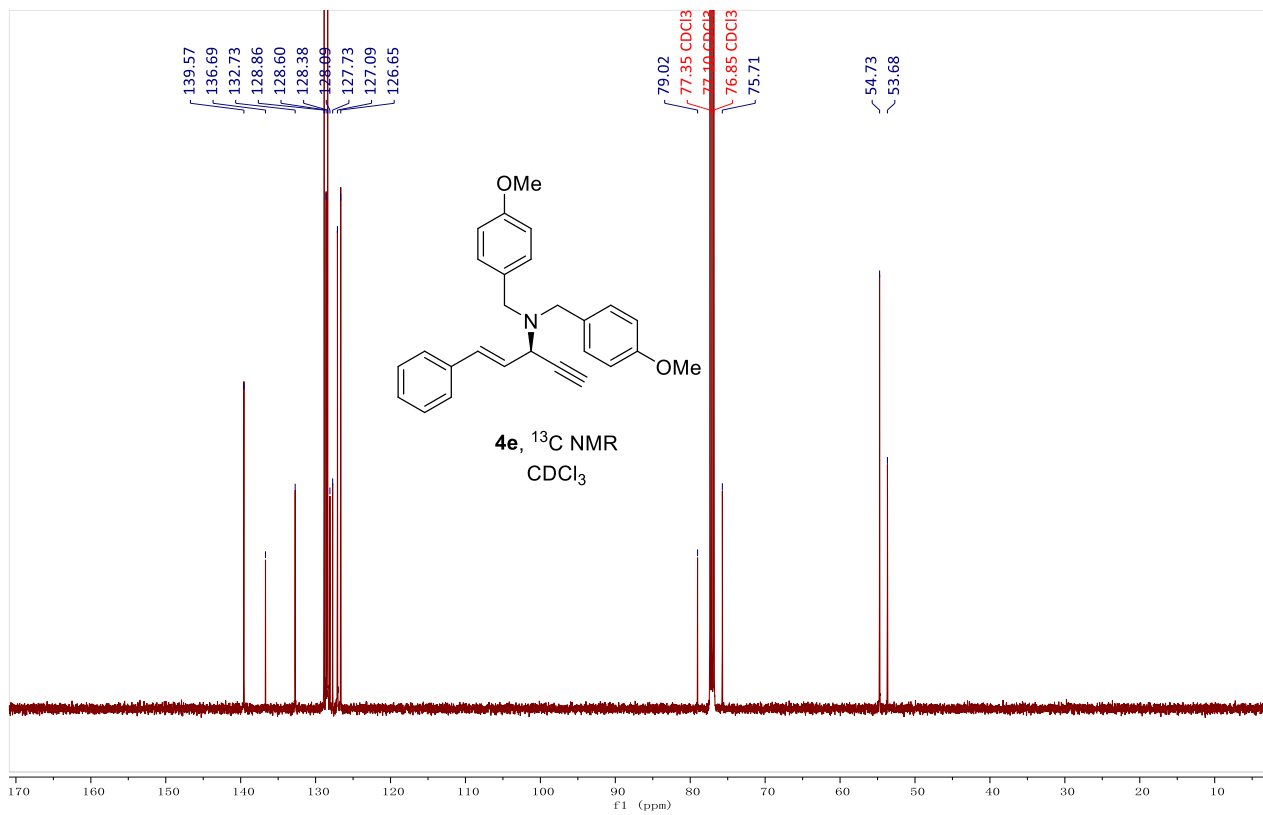

Supplement: d3qo01749d1.pdf [file d3qo01749d1.pdf]
